# Supplementary material for: Comparison of ultrasound-guided and traditional localisation in intraspinal anesthesia: a systematic review and network meta-analysis
Source: PubMed Central journal article supplement — BMJ Open. 2023 Nov 2;13(11):e071253. doi: 10.1136/bmjopen-2022-071253 (PMC10626869; doi:10.1136/bmjopen-2022-071253), 2023-11-02
Supplement: bmjopen-2022-071253.draft_revisions.pdf [file bmjopen-2022-071253.draft_revisions.pdf]

# BMJ Open

BMJ Open is committed to open peer review. As part of this commitment we make the peer review history of every article we publish publicly available.

When an article is published we post the peer reviewers' comments and the authors' responses online. We also post the versions of the paper that were used during peer review. These are the versions that the peer review comments apply to.

The versions of the paper that follow are the versions that were submitted during the peer review process. They are not the versions of record or the final published versions. They should not be cited or distributed as the published version of this manuscript.

BMJ Open is an open access journal and the full, final, typeset and author-corrected version of record of the manuscript is available on our site with no access controls, subscription charges or pay-per-view fees (<http://bmjopen.bmj.com>).

If you have any questions on BMJ Open's open peer review process please email [info.bmjopen@bmj.com](mailto:info.bmjopen@bmj.com)

# BMJ Open

## Comparison of ultrasound-guided and traditional localization in intraspinal anesthesia: a systematic review and network meta-analysis

|                               |                                                                                                                                                                                                                                                                                                                                                                                                                                                                                                                                                                                                                                                  |
|-------------------------------|--------------------------------------------------------------------------------------------------------------------------------------------------------------------------------------------------------------------------------------------------------------------------------------------------------------------------------------------------------------------------------------------------------------------------------------------------------------------------------------------------------------------------------------------------------------------------------------------------------------------------------------------------|
| Journal:                      | <i>BMJ Open</i>                                                                                                                                                                                                                                                                                                                                                                                                                                                                                                                                                                                                                                  |
| Manuscript ID                 | bmjopen-2022-071253                                                                                                                                                                                                                                                                                                                                                                                                                                                                                                                                                                                                                              |
| Article Type:                 | Original research                                                                                                                                                                                                                                                                                                                                                                                                                                                                                                                                                                                                                                |
| Date Submitted by the Author: | 31-Dec-2022                                                                                                                                                                                                                                                                                                                                                                                                                                                                                                                                                                                                                                      |
| Complete List of Authors:     | Zhang, Yinzhou; Guangzhou University of Traditional Chinese Medicine First Affiliated Hospital<br>Huang, Jieling; Guangzhou University of Traditional Chinese Medicine First Affiliated Hospital<br>Wei, Junying; Guangzhou University of Traditional Chinese Medicine First Affiliated Hospital<br>Ma, WuHua; Guangzhou University of Traditional Chinese Medicine First Affiliated Hospital, The First Affiliated Hospital of Guangzhou University of Chinese Medicine<br>Li, Yuhui; Guangzhou University of Traditional Chinese Medicine First Affiliated Hospital, The First Affiliated Hospital of Guangzhou University of Chinese Medicine |
| Keywords:                     | Ultrasonography < OBSTETRICS, Adult anaesthesia < ANAESTHETICS, Adult surgery < SURGERY                                                                                                                                                                                                                                                                                                                                                                                                                                                                                                                                                          |
|                               |                                                                                                                                                                                                                                                                                                                                                                                                                                                                                                                                                                                                                                                  |

SCHOLARONE™  
Manuscripts

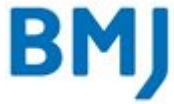

I, the Submitting Author has the right to grant and does grant on behalf of all authors of the Work (as defined in the below author licence), an exclusive licence and/or a non-exclusive licence for contributions from authors who are: i) UK Crown employees; ii) where BMJ has agreed a CC-BY licence shall apply, and/or iii) in accordance with the terms applicable for US Federal Government officers or employees acting as part of their official duties; on a worldwide, perpetual, irrevocable, royalty-free basis to BMJ Publishing Group Ltd ("BMJ") its licensees and where the relevant Journal is co-owned by BMJ to the co-owners of the Journal, to publish the Work in this journal and any other BMJ products and to exploit all rights, as set out in our [licence](#).

The Submitting Author accepts and understands that any supply made under these terms is made by BMJ to the Submitting Author unless you are acting as an employee on behalf of your employer or a postgraduate student of an affiliated institution which is paying any applicable article publishing charge ("APC") for Open Access articles. Where the Submitting Author wishes to make the Work available on an Open Access basis (and intends to pay the relevant APC), the terms of reuse of such Open Access shall be governed by a Creative Commons licence – details of these licences and which [Creative Commons](#) licence will apply to this Work are set out in our licence referred to above.

Other than as permitted in any relevant BMJ Author's Self Archiving Policies, I confirm this Work has not been accepted for publication elsewhere, is not being considered for publication elsewhere and does not duplicate material already published. I confirm all authors consent to publication of this Work and authorise the granting of this licence.

## Comparison of ultrasound-guided and traditional localization in intraspinal anesthesia: a systematic review and network meta-analysis

Yin-Zhou Zhang<sup>1†</sup>, Jie-ling Huang<sup>1†</sup>, Jun-ying Wei<sup>1</sup>, Wu-Hua Ma<sup>1</sup>, Yu-Hui Li<sup>1\*</sup>

1 .Department of Anesthesiology, The First Affiliated Hospital of Guangzhou

University of Chinese Medicine. † : Co-Author, \*: Corresponding Author

Corresponding author: Yuhui Li; E-mail: liliuyuhui@126.com

### Abstract

**Introduction:** The optimal puncture technique for intraspinal anesthesia in different populations is unclear. We attempted to obtain data from randomized controlled trials to compare the impact of ultrasound-guided techniques and traditional localization techniques on the success rate of intraspinal anesthesia puncture.

**Method:** In a systematic review and network meta-analysis, we searched trials in PubMed, Embase, Cochrane Library and Web of Science, from inception to 31 September 2022, for technique of intraspinal anesthesia. The primary outcome was the success rate of the first puncture. We used surface under the cumulative ranking curve (SUCRA) to establish the probability of an intervention ranking highest. A pairwise comparative analysis of various techniques was conducted using forest maps.

**Results:** Twenty-two randomized controlled trials containing 3 different interventions were included. The SUCRA values of the interventions for first-pass success rate were real-time guidance (82.8%), ultrasound-assisted (67.1%), traditional localization (0.1%). Compared with traditional localization, both ultrasound-assisted and real-time guidance could improve the success rate of the first puncture, but there was no statistical difference between them. In the subgroup analysis, first puncture success rate in pregnant women and obese patients. When compared with traditional positioning, real-time ultrasound guidance (mean difference, 2.33; 95% CrI, 1.27 to 4.27), and ultrasound-assisted (mean difference, 1.52; 95% CrI, 1.10 to 2.10). In terms of the success rate of the first puncture attempt in elderly patients with lumbar anatomic abnormalities, compared with traditional positioning, real-time ultrasound guidance (mean difference, 1.16; 95% CrI, 0.95 to 1.43), and ultrasound-assisted (mean difference, 1.88; 95% CrI, 1.55 to 2.28).

**Conclusion:** Compared with traditional positioning, ultrasound guidance technology can improve the success rate of the first puncture in intraspinal anesthesia, but there is no significant difference between ultrasound assistance and real-time guidance technology. In the subgroup analysis, in terms of the success rate of the first puncture, real-time ultrasound guidance technology is more suitable for pregnant women and obese patients, and ultrasound-assisted technology is more suitable for elderly patients with lumbar anatomic abnormalities.

**Keywords:** ultrasound guidance; landmark; spinal anesthesia; lower limb surgery

### 1. Introduction

As a common anesthesia method, the traditional operation method is to manually touch the body surface markers to determine the puncture position. Recently ultrasound is increasingly being used for intraspinal anesthesia<sup>[1]</sup>. Currently, there are two kinds of ultrasound techniques used in intraspinal anesthesia. On the one hand, preoperative ultrasound scan can help to determine the puncture point and estimate the puncture depth; on the other hand, real-time ultrasound guidance technology (needle insertion under ultrasound visualization) can more accurately estimate the location and trajectory of needle insertion. Among the existing studies,

1  
2  
3 some studies have compared the application of ultrasound-assisted technology with traditional  
4 positioning methods, and some studies have compared the real-time ultrasound guidance  
5 technology with traditional positioning methods. There are few studies between the two  
6 ultrasound techniques. A study by Chen pointed out that ultrasound-assisted spinal anesthesia is  
7 superior to real-time guidance in hip surgery of elderly patients<sup>[2]</sup>, while Parli pointed out that  
8 ultrasound-guided real-time spinal anesthesia has shorter operation time and higher success rate  
9 of the first puncture in lower limb surgery of obese patients<sup>[3]</sup>. At present, it is still controversial  
10 which of the three spinal anesthesia methods is the best. Therefore, we reviewed the articles  
11 comparing the application of traditional localization, ultrasound-assisted and real-time guidance  
12 techniques in spinal anesthesia. Through network meta-analysis, the three methods of spinal  
13 anesthesia were systematically evaluated.

## 14 2. Materials and methods

15 We adhered to the recommendations from the Preferred Reporting Items for Systematic  
16 Reviews and Meta-Analyses (PRISMA)<sup>[4]</sup> and registered the meta-analysis and systematic review  
17 in the PROSPERO database. We developed the protocol for this review and registered it in the  
18 PROSPERO network (registration number: CRD42022376041) on 28 November 2022. The present  
19 network meta-analysis (NMA) was conducted in accordance with the protocol recommended by  
20 the Cochrane Collaboration<sup>[5]</sup> and presented following the Preferred Reporting Items for  
21 Systematic Reviews and Meta-analyses guidelines<sup>[6]</sup>.

### 22 2.1 Search strategy

23 We searched PubMed, EMBASE, Web of Science and Cochrane Library databases to search  
24 for all relevant articles up to 31 September 2022. The key words are "ultrasound real-time  
25 guidance", "ultrasound assistance", "landmark palpation", "traditional positioning", "epidural  
26 anesthesia", "spinal anesthesia" and "combined spinal-epidural anesthesia". The search is  
27 conducted by the combination of subject words and free words.

### 28 2.2 Inclusion and exclusion criteria

29 We only included randomized controlled trials (RCT) and compared two or three auxiliary  
30 methods for intraspinal anesthesia. The PICO-SD information was as follows: patients (P): under  
31 intraspinal anesthesia included epidural anesthesia, spinal anesthesia and combined  
32 spinal-epidural anesthesia; intervention (I): traditional positioning, ultrasound-assisted localization  
33 or real-time ultrasound guidance; comparison (C): one auxiliary method for intraspinal  
34 anesthesia; outcome measures (O): the primary outcome was first-pass success rate (defined as  
35 the needle achieving successful dural puncture through a single attempt without redirection); the  
36 secondary outcomes were first-attempt success rate (defined as the needle reaching the  
37 subarachnoid space within a single insertion attempt and allowing redirection), identify time (the  
38 time from when the operator touched the patients' skin to the marking of the insertion point on  
39 the skin, and the time from when the probe was placed on the skin to the marking of the  
40 insertion point) and puncture time (interval between the contact of the skin with the needle, and  
41 the observation of cerebrospinal fluid from the spinal needle); and study design (SD): RCT.

42 The exclusion criteria were as follows: 1) review articles, case reports, case-series, letters to  
43 the editor, commentaries, proceedings, laboratory science studies, and any other non-relevant  
44 studies and 2) studies that did not report the outcomes of interest.

### 45 2.3. Study selection

46 Two authors individually scanned the titles and abstracts of the reports identified via the  
47  
48  
49  
50  
51  
52  
53  
54  
55  
56  
57  
58  
59  
60

1  
2  
3 search strategies described above. If a report was determined eligible from the title or abstract,  
4 the full paper was retrieved and evaluated. The same authors also discussed to arrive at a  
5 consensus as to whether a study should be included or excluded. Disagreement over inclusion or  
6 exclusion was settled in discussion with a third author.  
7

#### 8 2.4. Data extraction 9

10 All interrelated data from the included studies were independently extracted and entered  
11 into standardized forms by other two authors and then cross-checked. Any discrepancy was  
12 resolved through consultation. The standardized form included the following items: 1) title, 2)  
13 name of first author, 3) year of publication, 4) study design, 5) choice of anesthesia, 6) type of  
14 surgery, 7) risk of bias, 8) inclusion criteria, 9) exclusion criteria, 10) BMI, 11) age, 12) number of  
15 subjects, 13) first-pass success, 14) first attempt success, 15) identify time, 16) and procedure  
16 time.  
17

18  
19 The data were initially extracted from the tables or text. When it comes to transforming  
20 continuous variables that do not conform to normal distribution into the form of mean and  
21 standard deviation, we make the transformation according to the corresponding method<sup>[7-9]</sup>.  
22

#### 23 2.5. Risk of bias assessment

24 The quality of studies was independently assessed by two authors using the tool of 'risk of  
25 bias' according to Review Manager (version 5.3). The quality was evaluated using the following  
26 potential sources of bias: random sequence generation, allocation concealment, blinding of  
27 participants and personnel, blinding of outcome assessment, incomplete outcome data and  
28 selective reporting. The methodology for each study was graded as 'high', 'low', or 'unclear',  
29 which reflects the risk of bias<sup>[5]</sup>.  
30

#### 31 2.6. Statistical analysis

32 A multiple treatment comparison NMA is a meta-analysis generalization method that  
33 includes both direct and indirect RCT comparisons of treatments. A random-effects NMA based  
34 on a frequentist framework was performed using STATA 15 software and Review Manager  
35 (version 5.3).  
36

37  
38 Before conducting the NMA, we evaluated the transitivity assumption by examining the  
39 comparability of the risk of bias (all versus removing high risks of bias for randomization,  
40 allocation concealment, and blinding of outcome assessor) as a potential treatment-effect  
41 modifier across comparisons<sup>[4]</sup>.  
42

43 A network plot linking all the included research was formed to indicate the types of auxiliary  
44 methods for intraspinal anesthesia, number of patients under different research and amount of  
45 pair-wise comparison. The nodes showed auxiliary methods for intraspinal anesthesia being  
46 compared, and the edges showed available direct comparisons among auxiliary methods for  
47 intraspinal anesthesia. The nodes and edges were weighed on the basis of the numbers of  
48 patients and studies.  
49

50  
51 A rankogram and cumulative ranking curve were drawn for each auxiliary method for  
52 intraspinal anesthesia. A rankogram plots the probabilities for treatments to assume any of the  
53 possible ranks. We used the surface under the cumulative ranking curve (SUCRA) values to  
54 present the hierarchy of auxiliary methods for intraspinal anesthesia for first-pass success rate  
55 and the first-attempt success rate. The SUCRA is a relative ranking measure that accounts for the  
56 uncertainty in treatment order, that is, accounts both for the location and the variance of all  
57 relative treatment effects<sup>[10]</sup>. A higher SUCRA value was regarded as a better result for individual  
58  
59  
60

1  
2  
3 interventions.

4  
5 2.7. Patient and Public Involvement

6 No patients were involved in the study.

7  
8 3. Results

9 From the PubMed and EMBASE database search, 128 and 359 studies were initially  
10 evaluated. At the same time, we retrieved the Web of science and Cochrane Library  
11 database. After adjusting for duplicates, 148 studies remained. Of these, 92 studies were  
12 discharged because it appeared that these studies were out of our interest after reviewing the  
13 titles and abstracts. The full texts of the 56 remaining studies were reviewed in detail; 34 studies  
14 were excluded for the reasons: not set control (n=20), not report outcome of  
15 interest (n=14) (Fig.1).

16  
17 3.1. Study characteristics

18 The characteristics of the 22 studies are summarized in Table 1. All the experiments were  
19 two-arm or three-arm experiments. Among them, 13 studies compared ultrasound-assisted  
20 localization with traditional localization<sup>[11-23]</sup>, 5 studies compared ultrasound-assisted localization  
21 with traditional localization<sup>[24-28]</sup>, and 3 studies compared the application of ultrasound-assisted  
22 localization and real-time guidance in intraspinal anesthesia<sup>[2,19,3]</sup>. A study compared the  
23 application of three methods in spinal cord anesthesia<sup>[20]</sup>. Table 1 lists the first author and the  
24 year of publication in the literature, as well as basic information such as the mode of anesthesia,  
25 type of operation, sample size in each group, patient age, BMI, including maternal (including  
26 obese), orthopedic patients (including the elderly and patients with spinal anatomy  
27 abnormalities). In all of the included studies, the ultrasound probes used were portable  
28 low-frequency convex array probes and did not include special puncture probes.

29  
30 Table 1.

31 The characteristics of studies included in this analysis.

32  
33  
34  
35  
36

| The author           | Time of Publication | Type of patient | Type of surgery      | Method of anesthesia (E, S, CSE) | Age (&, #, *)              | BMI (&, #, *)                                                 | Sample size (&, #, *) |
|----------------------|---------------------|-----------------|----------------------|----------------------------------|----------------------------|---------------------------------------------------------------|-----------------------|
| Karthikeyan[11]      | 2018                | adult           | knee and hip surgery | S                                | 65.3±9.7#<br>68.2±10.3&    | 30.1±6.4#<br>30.6±4.7&                                        | 59#<br>60&            |
| Sangeeta Dhanger[12] | 2018                | maternal        | cesarean section     | S                                | 23.06±3.01#<br>24.03±3.43& | 27.2±3.8#<br>27.2±4.2&                                        | 50#<br>50&            |
| Cristian Arzola[13]  | 2015                | maternal        | childbirth           | E                                | 32.3±5.8#<br>32.7±4.7&     | 29±5.1#<br>29.3±6&                                            | 60#<br>68&            |
| Y. C. Lim[14]        | 2014                | adult           | lower limb surgery   | S                                | 61.1±13.3#<br>63.7±12.6&   | 25.4±5.6#<br>25.0±5.9                                         | 85#<br>85&            |
| Chin[15]             | 2018                | maternal        | cesarean section     | CSE                              | No                         | 30.2 <sup>a</sup> (27.0-<br>36.5)#<br>30.5 <sup>a</sup> (26.9 | 105#<br>110&          |

37  
38  
39  
40  
41  
42  
43  
44  
45  
46  
47  
48  
49  
50  
51  
52  
53  
54  
55  
56  
57  
58  
59  
60

|                            |      |                                      |                             |     |                                                                    |                          |            |
|----------------------------|------|--------------------------------------|-----------------------------|-----|--------------------------------------------------------------------|--------------------------|------------|
|                            |      |                                      |                             |     |                                                                    | - 34.2)&                 |            |
| Bingdong Tao[16]           | 2021 | maternal                             | cesarean section            | CSE | 32.3±5.2#<br>30.6±3.8&                                             | 28.3±3.0#<br>28.3±2.2&   | 64#<br>64& |
| Mohd Anas Khan[17]         | 2022 | orthopedic patient                   | lower limb surgery          | CSE | 54.5±12.8#<br>57.7±13.2&                                           | 29.3±4.6#<br>27.7±3.8&   | 50#<br>50& |
| Mengzhu Li[18]             | 2019 | obese patients                       | cesarean section            | CSE | 29.5±3.9#<br>30.1±4.5&                                             | No                       | 40#<br>40& |
| Sun-Kyung Park[19]         | 2019 | old age patient                      | lower limb surgery          | S   | 71.1±7.2#<br>71.2±6.1&                                             | 25.8±3.1#<br>25.8±3.1&   | 40#<br>40& |
| Mohamed Mohamed Tawfik[20] | 2017 | maternal                             | cesarean section            | CSE | 27.7±4#<br>26.7±3.8&                                               | 29.2±3#<br>29.2±2.9&     | 53#<br>55& |
| Sun-Kyung Park[21]         | 2020 | anatomic abnormality of lumbar spine | lower limb surgery          | S   | 70.5±8.8#<br>66.5±13.2&                                            | 26.1±3.2#<br>25.9±2.9&   | 22#<br>22& |
| Bo Qu[22]                  | 2020 | old age patient                      | hip surgery                 | CSE | 83.3±6.7#<br>82.3±7.1&                                             | 21.6±3.6#<br>20.6±3.0&   | 40#<br>40& |
| Xiu Ni[23]                 | 2021 | obese patients                       | cesarean section            | CSE | 31.8±4.8#<br>31.4±4.2&                                             | 33.5±2.1#<br>33.0±2.1&   | 40#<br>40& |
| Bertam[24]                 | 2017 | adult                                | lower limb surgery          | S   | No                                                                 | No                       | 30*<br>30& |
| Tanya Mital[25]            | 2021 | children                             | chest and abdominal surgery | E   | 2.4±1.3*<br>3.0±1.7&                                               | No                       | 23*<br>22& |
| Jatuporn Pakpirom [26]     | 2020 | adult                                | chest and abdominal surgery | E   | 60.0 <sup>a</sup> (51.0-67.0)*<br>58.5 <sup>a</sup> (53.75-70.25)& | 23.4±4.0*<br>22.8±3.5&   | 48*<br>48& |
| Jindi Jiang[27]            | 2021 | overweight mothers                   | childbirth                  | E   | 29.2±3.1*<br>28.4±3.4&                                             | 35.6±2.0*<br>35.2±2.4&   | 30*<br>30& |
| Hesham[28]                 | 2017 | anatomic abnormality of lumbar spine | knee and hip surgery        | S   | 69±10*<br>70±10&                                                   | 34±11*<br>33±8&          | 14*<br>18& |
| Luying Chen[2]             | 2021 | old age patient                      | hip surgery                 | S   | 82.7±6.6*<br>84.5±6.2#                                             | 21.9±3.1*<br>21.3±3.4#   | 57*<br>57# |
| Yasser Mohamed[29]         | 2020 | maternal                             | childbirth                  | E   | 25.4±5.1*<br>26.8±5.65#                                            | 37.9±4.3*<br>38.1±4.2#   | 50*<br>50# |
| Parli                      | 2021 | obese                                | lower limb                  | S   | 58.5 <sup>a</sup> (50.3, 6                                         | 34.9 <sup>a</sup> (33.1, | 40*        |



|                                                                                       |      |          |                    |   |                                             |                                             |                   |
|---------------------------------------------------------------------------------------|------|----------|--------------------|---|---------------------------------------------|---------------------------------------------|-------------------|
| Raghavan Ravi [3]                                                                     |      | patients | surgery            |   | 5.8)*<br>59.5 <sup>a</sup> (52.3, 65.8)#    | 36.35)*<br>34.9 <sup>a</sup> (33.1, 36.40)# | 40#               |
| Deepak Bhardwaj [30]                                                                  | 2022 | adult    | lower limb surgery | S | 39.66±13.27&<br>42.88±12.72#<br>43.6±15.24* | 22.8±2.8&<br>22.4±3.4#<br>23.9±3.0*         | 50&<br>50#<br>50* |
| <sup>a</sup> range                                                                    |      |          |                    |   |                                             |                                             |                   |
| &:landmark group #: ultrasound assisted group *:real time group                       |      |          |                    |   |                                             |                                             |                   |
| E:Epidural anesthesia S:Spinal anesthesia CSE:Combined spinal and epidural anesthesia |      |          |                    |   |                                             |                                             |                   |

### 3.2. Risk of bias assessment

The quality indicators of the included studies are described in Figure 2. All studies applied random sequence generation, and twelve studies included concealed allocation. Blinding of participants was not specified, except in five studies, which had a low risk. And one study had a high risk of bias in blinding of procedure performers which can be explained by the difficulty of blinding in procedure. Incomplete outcome data was also difficult to achieve; five studies had an unspecified risk. None of the studies had blinding of outcome and selective reporting.

### 3.3. Synthesis of results

For all the results of each specific data, we give the network map, the forest map of a single study, the forest map of pairwise comparison, and the cumulative ranking curve. A summary of the results is shown in figures 3 to 7.

### 3.4. First pass rate

The success rate of the first pass of the needle was recorded in 19 two-arm studies and one three-arm study, which were pooled for analysis<sup>[2,3,11-17,19-27,29,30]</sup>. In all studies, traditional positioning is the most frequent reference (Fig. 3A). In this study, the success rate of puncture in the ultrasound-assisted group and real-time guidance group seemed to be higher than that in the traditional localization group (Fig. 4A). However, there was no significant difference between ultrasound-assisted group and real-time guidance group (Fig. 5A). Draw a cumulative sorting chart to calculate the SUCRA probabilities of traditional positioning, auxiliary positioning and real-time guidance (Fig. 6A). According to SUCRA, real-time guidance had the highest success rate in the first puncture (82.8%), followed by ultrasound-assisted (67.1%), and finally traditional localization (0.1%). Funnels are roughly distributed on both sides of the midline, and publication bias is unlikely to occur (Fig. 7A).

### 3.5. First attempt rate

A total of 16 trials provided data on the pass rate of first attempts<sup>[2,3,11,12,14,18-22,24-28,30]</sup>. The forest map results show that the use of ultrasound is related to the pass rate of the first attempt (Fig. 4B). However, the combined network Meta analysis showed that there was no significant difference between ultrasound-assisted and real-time guidance (Fig. 5B). The cumulative ranking chart shows that ultrasound-assisted has the highest pass rate in the first attempt (75.3%), followed by real-time guidance (74.6%) and traditional positioning (0.1%). However, there was no significant statistical difference between ultrasound-assisted and real-time guidance in the pairwise comparison of the combined results (Fig. 6B). Funnel chart also shows that there is little

1  
2  
3 publication bias(Fig.7B).

### 4 3.6. Identify time

5 The results<sup>[2,3,11-12,17-19,21-23,26-27,30]</sup> of Meta analysis showed that the traditional location  
6 method had the shortest location time(Fig.6C), but there was no significant difference between  
7 ultrasound-assisted and real-time guided puncture location time(Fig.5C).The funnel is shown in  
8 figure 7C.

### 9 3.7. Procedure time of spinal anesthesia

10 A total of 9 studies, including 8 double-arm studies and 1 three-arm  
11 study<sup>[3,11,12,14,18,19,21,28,30]</sup>, were collected to compare the whole process of spinal anesthesia from  
12 puncture needle contact to cerebrospinal fluid outflow. The combined analysis showed that the  
13 ultrasound-assisted operation time was the shortest(Fig.6D), and there was no significant  
14 difference between the real-time guidance group and the traditional positioning  
15 group(Fig.5D).Funnel also shows that publication bias is unlikely(Fig.7D).

### 16 3.8. Subgroup analysis

17 In the first subgroup, we included nine studies of pregnant women and obese people with an  
18 average age of less than 60 years and a BMI greater than 33.The network diagram comparing the  
19 first pass rate<sup>[3,12,13,15,16,20,23,27,29]</sup> and the first attempt<sup>[3,12,18,20,27]</sup> rate is shown in figure 3E and  
20 figure 3F.The cumulative sorting chart shows that real-time guidance seems to be the  
21 recommended method in terms of the first puncture pass rate and the first attempt pass rate  
22 (Fig. 6E and 6F). The funnel chart indicates that a publication bias is unlikely(Fig. 7E and 7F).

23 In the second subgroup analysis, we included patients with an average age of over 70 years,  
24 including lumbar anatomical abnormalities (previous lumbar surgery or scoliosis)<sup>[2,19,21,22,28]</sup>.The  
25 results of meta analysis and merger show that the pass rate of the first attempt seems to be  
26 higher in the ultrasound-assisted group(Fig. 5G), and the cumulative ranking chart also shows  
27 that ultrasound-assisted is the most recommended(Fig. 6G). The funnel chart is symmetrical  
28 around the zero line, indicating that publication bias is unlikely(Fig. 7G).

## 29 Discussion

30 Recently, more and more people are interested in using ultrasound to guide or assist spinal  
31 anesthesia, epidural anesthesia or combined spinal-epidural anesthesia<sup>[31-33]</sup>.The research  
32 supports that the application of this technology can improve the success rate and reduce the  
33 number of attempts<sup>[34-35]</sup>.the National Institute for Health and Clinical Excellence (NICE) in the  
34 United Kingdom published guidelines<sup>[36]</sup>suggesting that ultrasound could be used both as a  
35 pre-procedural assessment tool and for real-time needle insertions.

36 The two main indicators to measure the difficulty of intraspinal anesthesia are the number of  
37 times needed to adjust the needle for successful puncture and the time required for the whole  
38 operation.Multiple acupuncture is an independent predictor of complications, such as  
39 unintentional dural puncture, vascular puncture and sensory abnormalities<sup>[37]</sup>.The ideal  
40 intraspinal anesthesia requires a single successful puncture<sup>[24]</sup>.Minimizing the number of  
41 attempts helps to reduce the risk of complications and improve patient satisfaction<sup>[38]</sup>.Previous  
42 studies have shown that pre-puncture ultrasound scan can improve the success rate of puncture  
43 and reduce the number of puncture<sup>[39]</sup>.The feature of real-time guidance technology is that the  
44 trajectory of needle can be observed in real time during puncture to improve the success rate of  
45 puncture<sup>[24,40-42]</sup>.This is consistent with our analysis.

46 However, the analysis results showed that there was no difference between ultrasound  
47  
48  
49  
50  
51  
52  
53  
54  
55  
56  
57  
58  
59  
60

1  
2  
3 assistance and real-time guidance in the success rate of the first puncture and the success rate of  
4 the first attempt. However, subgroup analysis found that real-time guidance technology had  
5 more advantages for puerpera and obese people. Ultrasound-assisted technique is more  
6 recommended in the elderly and patients with abnormal spinal anatomy.  
7

8 We analyze the reasons for this difference. It is difficult for pregnant women and obese  
9 patients to achieve the ideal puncture position in the process of intraspinal anesthesia, and the  
10 difficulty of palpation may lead to the increase of puncture times, resulting in patient discomfort  
11 or puncture failure<sup>[43]</sup>. During pregnancy, an increase in lumbar protrusion, enlargement and  
12 rotation of the pelvis results in a deeper and narrower epidural space and a narrowing of the  
13 "safe area" between the ligamentum flavum and the dura mater<sup>[44]</sup>. However, this kind of people  
14 are generally younger, the ligaments of the waist are relatively soft, the boundary between  
15 muscle and fat is obvious, the anterior and posterior complex can be clearly seen under  
16 ultrasound, and the number of needle redirection can be significantly reduced by using real-time  
17 guidance technology<sup>[34,45]</sup>. However, real-time puncture is difficult in elderly patients. Due to the  
18 hyperplasia of vertebral body and appendages and the narrowing of vertebral space in elderly  
19 patients, the ordinary ultrasonic probe is more likely to block the puncture needle entry path,  
20 thus affecting the observation of the real-time trajectory of the puncture needle. Another  
21 advantage of ultrasound-assisted localization is that it can shorten the anesthesia operation  
22 time. Studies have shown that real-time guidance technology is not superior to  
23 ultrasound-assisted localization, because real-time guidance requires longer operation time,  
24 especially for elderly patients, which will reduce the satisfaction score<sup>[2]</sup>.  
25

26 Of course, we can't ignore other factors that affect our results. The puncture path adopted by  
27 the researchers included in the literature is not completely consistent. According to previous  
28 studies<sup>[46]</sup>, the para-median puncture path is better than the median position, because  
29 supraspinous and interspinous ligaments are avoided, and the calcification of ligaments will  
30 make the operator inject more hard and increase the number of attempts. Another aspect that  
31 cannot be ignored is the operator's experience. In the included literature, the operators were  
32 almost anesthesiologists who were skilled in the application of ultrasound technology for  
33 intraspinal anesthesia. The seniority of the anesthesiologist is also a factor in the success rate, an  
34 effect that may exaggerate the advantages of ultrasound-guided technology<sup>[47]</sup>. In addition,  
35 real-time ultrasound guidance technology is very difficult, which requires the operator to hold  
36 the probe to ensure the stability of the image while observing the needle trajectory. It is also a  
37 challenge for anesthesiologists with years of experience in ultrasound-assisted localization. This  
38 technical difference also affects our results. On the other hand, the choice of ultrasound probe  
39 will also affect real-time guided puncture. Due to the appearance of the common low-frequency  
40 convex array probe, the contact surface of the probe cannot completely fit the skin, and the  
41 curved shell of the probe will block the Angle of the needle in the process of puncture. Recently,  
42 TranD operated with a new puncture probe<sup>[45]</sup>. The probe is equipped with an epidural needle  
43 holder on the side, and the needle Angle can be adjusted in the probe plane. According to the  
44 pre-positioned intervertebral space and the pre-set needle insertion Angle, the operator only  
45 needs to pay attention to the needle insertion depth to complete the puncture. This method  
46 keeps the needle in the same plane as the probe, making the needle's trajectory visible at all  
47 times.  
48

49 This study also has a few limitations. Due to the difficulty of real-time guidance technology,  
50  
51  
52  
53  
54  
55  
56  
57  
58  
59  
60

there are few researches on this aspect at present, and the sample size included is smaller than that of assisted positioning, which will also affect our analysis. Therefore, our result cannot be extrapolated to other relevant studies.

Conclusion:

Our study shows that ultrasound-guided technique has a significant advantage in improving the success rate of the first puncture during intraspinal anesthesia. In addition, subgroup analysis showed that in terms of the success rate of the first puncture, real-time ultrasound guidance technology is more suitable for pregnant women and obese patients, and ultrasound-assisted technology is more suitable for elderly patients with lumbar anatomic abnormalities. The evidence in the current study is insufficient, mainly due to the heterogeneity and inaccuracy of the comparison. Due to the difficulty of real-time guidance technology, there are few studies at present. Future studies should focus on real-time ultrasound guidance technology and expand the application of visualization technology in spinal anesthesia.

**Acknowledgements :** The authors would like to thank the teachers of the Department of Anesthesiology, the First Affiliated Hospital of Guangzhou University of Chinese Medicine for their support.

**Contributors:** Yinzhou Zhang, Jieling Huang, Junying Wei, Wuhua Ma and Yuhui Li were involved in the design and conception of the research scheme. Yinzhou Zhang and Jieling Huang will screen the title, abstract and full text. If disagreement arises on inclusion or exclusion, it will be resolved through discussion with all authors (Junying Wei, Wuhua Ma and/or Yuhui Li). Yinzhou Zhang and Jieling Huang will extract data from the article independently, and third party reviewers (Junying Wei and/or Wuhua Ma) will check the integrity and correctness of the extracted data in the results evaluation. All authors drafted and revised this research protocol and approved it for publication.

**Funding:** This work was fully supported by the Department of Anesthesiology, the First Affiliated Hospital of Guangzhou University of Chinese Medicine.

**Competing interests:** None declared.

**Data availability statement:** No additional data available.

**Provenance and peer review :** Not commissioned; externally peer reviewed.

**Ethics and dissemination:** Formal ethical approval is not required as primary data will not be collected.

PROSPERO registration number: CRD42022376041

#### **Figure explanation**

**Fig.1.** Flow diagram

**Fig.2.** Consensus risk-of-bias assessment of the included studies.

Green = low risk; yellow = unclear; red = high risk.

**Fig3:** Network plot of the direct comparisons of the outcomes for all included studies. The width of the lines is proportional to the number of trials comparing every pair of treatments, and the size of every node is proportional to the number of randomized participants (sample size). 1: Traditional positioning, 2: Ultrasound assistance, 3: Real-time guidance; A) First pass rate, B) First attempt rate; C) Identify time; D) Procedure time of spinal anesthesia; E) Subgroup 1 first pass rate; F) Subgroup 1 first attempt rate; G) Subgroup 2 first attempt rate

**Fig4:** Forest plot for all included studies. 1: Traditional positioning, 2: Ultrasound assistance, 3: Real-time guidance. A) First pass rate, B) First attempt rate; C) Identify time; D) Procedure time

of spinal anesthesia; E) Subgroup 1 first pass rate; F) Subgroup 1 first attempt rate; G) Subgroup 2 first attempt rate

**Fig5:**Two-comparison forest diagram for all included studies.LAN:Traditional positioning,ULT:Ultrasound assistance, REA: Real-time guidance; A) First pass rate, B) First attempt rate; C) Identify time; D) Procedure time of spinal anesthesia; E) Subgroup 1 first pass rate; F) Subgroup 1 first attempt rate; G) Subgroup 2 first attempt rate

**Fig6:**Cumulative ranking curve of all included studies.landmark:Traditional positioning,ultrasound:Ultrasound assistance, real: Real-time guidance; A) First pass rate, B) First attempt rate; C) Identify time; D) Procedure time of spinal anesthesia; E) Subgroup 1 first pass rate; F) Subgroup 1 first attempt rate; G) Subgroup 2 first attempt rate

**Fig7:**funnel plots A) First pass rate, B) First attempt rate; C) Identify time; D) Procedure time of spinal anesthesia; E) Subgroup 1 first pass rate; F) Subgroup 1 first attempt rate; G) Subgroup 2 first attempt rate

#### Reference:

- [1].Tran D, Kamani AA, Lessoway VA, Peterson C, Hor KW, Rohling RN.Preinsertion paramedian ultrasound guidance for epidural anesthesia. *Anesth Analg* 2009; 109: 661 – 7
- [2].Chen L, Huang J, Zhang Y, Qu B, Wu X, Ma W, Li Y. Real-Time Ultrasound-Guided Versus Ultrasound-Assisted Spinal Anesthesia in Elderly Patients With Hip Fractures: A Randomized Controlled Trial. *Anesth Analg*. 2022 Feb 1;134(2):400-409.
- [3].Ravi PR, Naik S, Joshi MC, Singh S. Real-time ultrasound-guided spinal anaesthesia vs pre-procedural ultrasound-guided spinal anaesthesia in obese patients. *Indian J Anaesth*. 2021 May;65(5):356-361.
- [4].Salanti G. Indirect and mixed-treatment comparison, network, or multiple-treatments meta-analysis: many names, many benefits, many concerns for the next generation evidence synthesis tool. *Res Synth Methods* 2012;3:80–97.
- [5].Higgins JPT, Green S. *Cochrane Collaboration. Cochrane handbook for systematic reviews of interventions*. Chichester, England; Hoboken, NJ: Wiley-Blackwell; 2008.
- [6].Hutton B, Salanti G, Caldwell DM, Chaimani A, Schmid CH, Cameron C, et al. The PRISMA extension statement for reporting of systematic reviews incorporating network meta-analyses of health care interventions: checklist and explanations. *Ann Intern Med* 2015;162:777 – 84.
- [7].J. Shi, D. Luo, H. Weng, X. Zeng, L. Lin, H. Chu and T. Tong\* (2020), "Optimally estimating the sample standard deviation from the five-number summary", *Research Synthesis Methods*, 11: 641-654.
- [8].D. Luo, X. Wan, J. Liu and T. Tong\* (2018), "Optimally estimating the sample mean from the sample size, median, mid-range and/or mid-quartile range", *Statistical Methods in Medical Research*, 27: 1785-1805.
- [9].X. Wan, W. Wang, J. Liu and T. Tong\* (2014), "Estimating the sample mean and standard deviation from the sample size, median, range and/or interquartile range", *BMC Medical Research Methodology*, 14: 135.
- [10].Salanti G, Ades AE, Ioannidis JP. Graphical methods and numerical summaries for presenting results from multiple-treatment meta-analysis: an overview and tutorial. *J Clin Epidemiol* 2011;64:163–71.
- [11].Srinivasan KK, Leo AM, Iohom G, Loughnane F, Lee PJ. Pre-procedure ultrasound-guided

1  
2  
3 paramedian spinal anaesthesia at L5-S1: Is this better than landmark-guided midline approach? A  
4 randomised controlled trial. *Indian J Anaesth.* 2018 Jan;62(1):53-60.

5  
6 [12].Dhanger S, Vinayagam S, Vaidhyanathan B, Rajesh IJ, Tripathy DK. Comparison of landmark  
7 versus pre-procedural ultrasonography-assisted midline approach for identification of  
8 subarachnoid space in elective caesarean section: A randomised controlled trial. *Indian J*  
9 *Anaesth.* 2018 Apr;62(4):280-284.

10  
11 [13].Arzola C, Mikhael R, Margarido C, Carvalho JC. Spinal ultrasound versus palpation for  
12 epidural catheter insertion in labour: A randomised controlled trial. *Eur J Anaesthesiol.* 2015  
13 Jul;32(7):499-505.

14  
15 [14].Lim YC, Choo CY, Tan KT. A randomised controlled trial of ultrasound-assisted spinal  
16 anaesthesia. *Anaesth Intensive Care.* 2014 Mar;42(2):191-8.

17  
18 [15].Chin A, Crooke B, Heywood L, Brijball R, Pelecanos AM, Abeyapala W. A randomised  
19 controlled trial comparing needle movements during combined spinal-epidural anaesthesia with  
20 and without ultrasound assistance. *Anaesthesia.* 2018 Apr;73(4):466-473.

21  
22 [16].Tao B, Liu K, Ding M, Xue H, Li X, Zhao P. Ultrasound increases the success rate of spinal  
23 needle placement through the epidural needle during combined spinal-epidural anaesthesia: A  
24 randomised controlled study. *Eur J Anaesthesiol.* 2021 Mar 1;38(3):251-258.

25  
26 [17].Khan MA, Gupta M, Sharma S, Kasaudhan S. A comparative study of ultrasound assisted  
27 versus landmark technique for combined spinal-epidural anaesthesia in patients undergoing  
28 lower limb orthopaedic surgery. *Indian J Anaesth.* 2022 Apr;66(4):272-277.

29  
30 [18].Li M, Ni X, Xu Z, Shen F, Song Y, Li Q, Liu Z. Ultrasound-Assisted Technology Versus the  
31 Conventional Landmark Location Method in Spinal Anesthesia for Cesarean Delivery in Obese  
32 Parturients: A Randomized Controlled Trial. *Anesth Analg.* 2019 Jul;129(1):155-161.

33  
34 [19].Park SK, Yoo S, Kim WH, Lim YJ, Bahk JH, Kim JT. Ultrasound-assisted vs. landmark-guided  
35 paramedian spinal anaesthesia in the elderly: A randomised controlled trial. *Eur J Anaesthesiol.*  
36 2019 Oct;36(10):763-771.

37  
38 [20].Tawfik MM, Atallah MM, Elkhaboutly WS, Allakkany NS, Abdelkhalek M. Does  
39 Preprocedural Ultrasound Increase the First-Pass Success Rate of Epidural Catheterization Before  
40 Cesarean Delivery? A Randomized Controlled Trial. *Anesth Analg.* 2017 Mar;124(3):851-856.

41  
42 [21].Park SK, Bae J, Yoo S, Kim WH, Lim YJ, Bahk JH, Kim JT. Ultrasound-Assisted Versus  
43 Landmark-Guided Spinal Anesthesia in Patients With Abnormal Spinal Anatomy: A Randomized  
44 Controlled Trial. *Anesth Analg.* 2020 Mar;130(3):787-795.

45  
46 [22].Qu B, Chen L, Zhang Y, Jiang M, Wu C, Ma W, Li Y. Correction to: Landmark-guided versus  
47 modified ultrasound-assisted Paramedian techniques in combined spinal-epidural anesthesia for  
48 elderly patients with hip fractures: a randomized controlled trial. *BMC Anesthesiol.* 2020 Oct  
49 23;20(1):268.

50  
51 [23].Ni X, Li MZ, Zhou SQ, Xu ZD, Zhang YQ, Yu YB, Su J, Zhang LM, Liu ZQ. Accuro  
52 ultrasound-based system with computer-aided image interpretation compared to traditional  
53 palpation technique for neuraxial anesthesia placement in obese parturients undergoing  
54 cesarean delivery: a randomized controlled trial. *J Anesth.* 2021 Aug;35(4):475-482.

55  
56 [24].Chong SE, Mohd Nikman A, Saedah A, Wan Mohd Nazaruddin WH, Kueh YC, Lim JA, Shamsul  
57 Kamalrujan H. Real-time ultrasound-guided paramedian spinal anaesthesia: evaluation of the  
58 efficacy and the success rate of single needle pass. *Br J Anaesth.* 2017 May 1;118(5):799-801.

59  
60 [25].Mital T, Kamal M, Kumar M, Kumar R, Bhatia P, Singariya G. Comparison of landmark and



1  
2  
3 real-time ultrasound-guided epidural catheter placement in the pediatric population: a  
4 prospective randomized comparative trial. *Anesth Pain Med (Seoul)*. 2021 Oct;16(4):368-376.

5 [26].Pakpirom J, Thatsanapornsathit K, Kovitwanawong N, Petsakul S, Benjhawaleemas P,  
6 Narunart K, Boonchuduang S, Karmakar MK. Real-time ultrasound-guided versus anatomic  
7 landmark-based thoracic epidural placement: a prospective, randomized, superiority trial. *BMC*  
8 *Anesthesiol*. 2022 Jun 25;22(1):198.

9 [27].Jindi Jiang, Yujie Xu, Mingfeng He. Real-time ultrasound-guided vs. anatomical  
10 landmark-guided paramedian epidural anesthesia in overweight parturients undergoing  
11 analgesic labor: a randomized controlled trial. *Signa Vitae*. 2021. 17(6);66-73.

12 [28].Elsharkawy H, Maheshwari A, Babazade R, Perlas A, Zaky S, Mounir-Soliman L. Real-time  
13 ultrasound-guided spinal anesthesia in patients with predicted difficult anatomy. *Minerva*  
14 *Anesthesiol*. 2017 May;83(5):465-473.

15 [29].Yasser Mohamed Mohamed Osman.Comparing between ultrasound-assisted epidural  
16 catheter placement using Accuro and the use of ultrasound real time with acoustic  
17 puncture-assisted device to confirm epidural space end point, *Egyptian Journal of*  
18 *Anaesthesia*.2020,36:1, 140-146

19 [30].Bhardwaj D, Thakur L, Sharma S, Rana S, Gupta B, Sharma C. Comparative evaluation of  
20 three techniques for paramedian subarachnoid block: Point-of-care preprocedural ultrasound  
21 assisted, real-time ultrasound guided and landmark based. *Indian J Anaesth*. 2022 Mar;66(Suppl  
22 2):S102-S107.

23 [31]. Nassar M, Abdelazim IA. Pre-puncture ultrasound guided epidural insertion before vaginal  
24 delivery. *J Clin Monit Comput* 2015;29:573-7.

25 [32]. Rasoulia A, Lohser J, Najafi M, Rafii- Tari H, Tran D, Kamani AA, et al. Utility of prepuncture  
26 ultrasound for localization of the thoracic epidural space. *Can J Anaesth* 2011;58:815-23.

27 [33]. Hurdle MF. Ultrasound-Guided Spinal Procedures for Pain: A Review. *Phys Med Rehabil Clin*  
28 *N Am* 2016;27:673-86.

29 [34].Grau T, Leipold RW, Conradi R, Martin E, Motsch J. Efficacy of ultrasound imaging in  
30 obstetric epidural anesthesia. *J Clin Anesth* 2002; 14: 169-75.

31 [35].Grau T, Leipold RW, Conradi R, Martin E, Motsch J. Ultrasound imaging facilitates localization  
32 of the epidural space during combined spinal and epidural anesthesia. *Reg Anesth Pain Med*  
33 2001; 26: 64-7.

34 [36].National Institute of Health and Clinical Excellence. Ultrasound Guided Regional Nerve Block  
35 (IPG285).January 2013.

36 [37].Chin KJ, Ramlogan R, Arzola C, Singh M, Chan V. The utility of ultrasound imaging in  
37 predicting ease of performance of spinal anaesthesia in an orthopedic patient population. *Reg*  
38 *Anesth Pain Med* 2013;38:34-8.

39 [38]. Vogt M, van Gerwen DJ, Lubbers W, et al. Optimal point of insertion and needle angle in  
40 neuraxial blockade using a midline approach: a study in computed tomography scans of adult  
41 patients. *Reg Anesth Pain Med* 2017; 42:600 – 608.

42 [39].Kim H, Won D, Chang JE, et al. Ultrasound assessment of the anatomic landmarks for spinal  
43 anesthesia in elderly patients with hip fracture: a prospective observational study. *Medicine*  
44 (Baltimore). 2019;98:e16388.

45 [40].Karmakar MK, Li X, Ho AM, Kwok WH, Chui PT. Real-time ultrasound-guided paramedian  
46 epidural access:evaluation of a novel in-plane technique. *Br J Anaesth*.2009;102:845 – 854.

- 1  
2  
3 [41].Conroy PH, Luyet C, McCartney CJ, McHardy PG. Real-time ultrasound-guided spinal  
4 anaesthesia: a prospective observational study of a new approach. *Anesthesiol Res Pract.*  
5 2013;2013:525818.  
6  
7 [42].Liu Y, Qian W, Ke XJ, Mei W. Real-time ultrasound-guided spinal anesthesia using a new  
8 paramedian transverse approach. *Curr Med Sci.* 2018;38:910 – 913.  
9  
10 [43].Shaikh F, Brzezinski J, Alexander S, Arzola C, Jose CA, Carvalho JCA, et al. Ultrasound imaging  
11 for lumbar punctures and epidural catheterisations: systematic review and meta-analysis. *BMJ*  
12 2013;346:f1720.  
13  
14 [44].Celleno D, Gollo E, Uskok M. *Analgesia anestesia terapia intensiva in ostetricia.* Torino:  
15 Edizioni Minerva Medica; 2006.  
16  
17 [45].Tran D, Kamani AA, Al-Attas E, et al. Single-operator real-time ultrasound-guidance to aim  
18 and insert alubar epidural needle. *Canad J Anesth* 2010;57(4):313 – 21.  
19  
20 [46].Park SK, Cheun H, Kim YW, Bae J, Yoo S, Kim WH, Lim YJ, Kim JT. Ultrasound-assisted spinal  
21 anesthesia: A randomized comparison between midline and paramedian approaches. *J Clin*  
22 *Anesth.* 2022 Sep;80:110823.  
23  
24 [47].Perna P, Gioia A, Ragazzi R, Volta CA, Innamorato M. Can pre-procedure neuroaxial  
25 ultrasound improve the identification of the potential epidural space when compared with  
26 anatomical landmarks? A prospective randomized study. *Minerva Anesthesiol.* 2017  
27 Jan;83(1):41-49.  
28  
29  
30  
31  
32  
33  
34  
35  
36  
37  
38  
39  
40  
41  
42  
43  
44  
45  
46  
47  
48  
49  
50  
51  
52  
53  
54  
55  
56  
57  
58  
59  
60



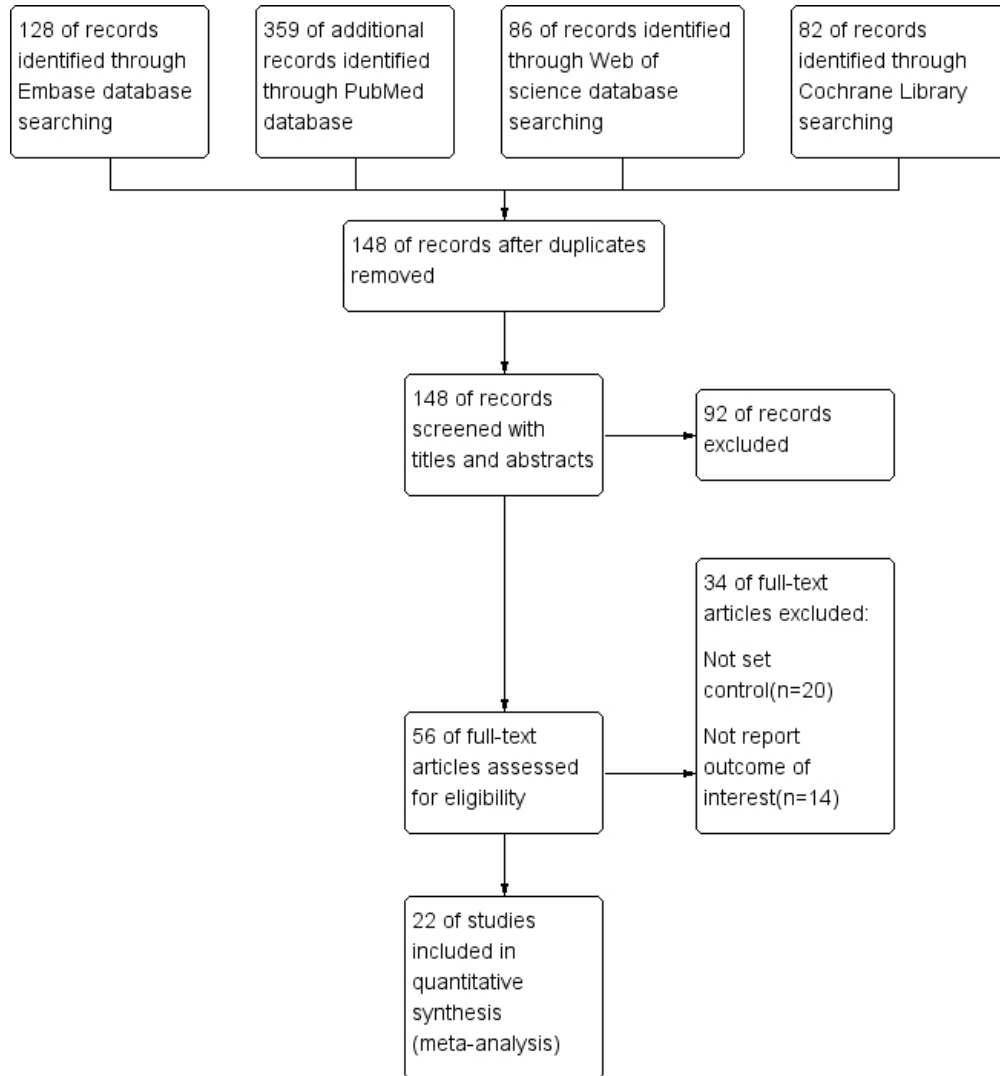

Fig.1.Flow diagram

230x246mm (72 x 72 DPI)

|                            | Random sequence generation (selection bias) | Allocation concealment (selection bias) | Blinding of participants and personnel (performance bias) | Blinding of outcome assessment (detection bias) | Incomplete outcome data (attrition bias) | Selective reporting (reporting bias) | Other bias |
|----------------------------|---------------------------------------------|-----------------------------------------|-----------------------------------------------------------|-------------------------------------------------|------------------------------------------|--------------------------------------|------------|
| A. Chin 2018               | +                                           | +                                       | ?                                                         | +                                               | ?                                        | +                                    | ?          |
| Bertam 2017                | ?                                           | ?                                       | ?                                                         | ?                                               | +                                        | +                                    | ?          |
| Bingdong Tao2021           | +                                           | +                                       | +                                                         | +                                               | ?                                        | +                                    | ?          |
| Bo Qu2020                  | +                                           | +                                       | ?                                                         | +                                               | +                                        | +                                    | ?          |
| Cristian Arzola 2015       | +                                           | ?                                       | +                                                         | ?                                               | +                                        | +                                    | ?          |
| Deepak Bhardwaj 2022       | +                                           | +                                       | +                                                         | ?                                               | +                                        | +                                    | ?          |
| Hesham2017                 | +                                           | +                                       | ?                                                         | +                                               | ?                                        | +                                    | ?          |
| Jatuporn Pakpirom2020      | +                                           | +                                       | +                                                         | +                                               | ?                                        | +                                    | ?          |
| Jindi Jiang2021            | +                                           | +                                       | +                                                         | +                                               | +                                        | +                                    | +          |
| Karthikeyan 2018           | +                                           | +                                       | ?                                                         | ?                                               | +                                        | +                                    | ?          |
| Luying Chen2021            | +                                           | ?                                       | ?                                                         | +                                               | +                                        | +                                    | ?          |
| Mengzhu Li2019             | +                                           | +                                       | +                                                         | +                                               | +                                        | +                                    | ?          |
| Mohamed Mohamed Tawfik2017 | +                                           | +                                       | +                                                         | +                                               | ?                                        | +                                    | ?          |
| Mohd Anas Khan2022         | +                                           | +                                       | +                                                         | +                                               | +                                        | +                                    | ?          |
| Parli Raghavan Ravi2021    | +                                           | ?                                       | ?                                                         | +                                               | +                                        | +                                    | ?          |
| Sangeeta Dhanger 2018      | +                                           | +                                       | ?                                                         | +                                               | +                                        | +                                    | ?          |
| Sun-Kyung Park2019         | +                                           | +                                       | ?                                                         | +                                               | +                                        | +                                    | ?          |
| Sun-Kyung Park2020         | +                                           | +                                       | ?                                                         | +                                               | +                                        | +                                    | ?          |
| Tanya Mital2021            | +                                           | +                                       | ?                                                         | +                                               | +                                        | +                                    | ?          |
| Xiu Ni 2021                | +                                           | +                                       | +                                                         | ?                                               | +                                        | +                                    | ?          |
| Y. C. Lim 2014             | +                                           | +                                       | ?                                                         | ?                                               | +                                        | +                                    | ?          |
| Yasser Mohamed 2020        | +                                           | ?                                       | ?                                                         | ?                                               | +                                        | +                                    | ?          |

Fig.2.Consensus risk-of-bias assessment of the included studies.  
Green = low risk; yellow = unclear; red =high risk.

146x353mm (72 x 72 DPI)

1  
2  
3  
4  
5  
6  
7  
8  
9  
10  
11  
12  
13  
14  
15  
16  
17  
18  
19  
20  
21  
22  
23  
24  
25  
26  
27  
28  
29  
30  
31  
32  
33  
34  
35  
36  
37  
38  
39  
40  
41  
42  
43  
44  
45  
46  
47  
48  
49  
50  
51  
52  
53  
54  
55  
56  
57  
58  
59  
60

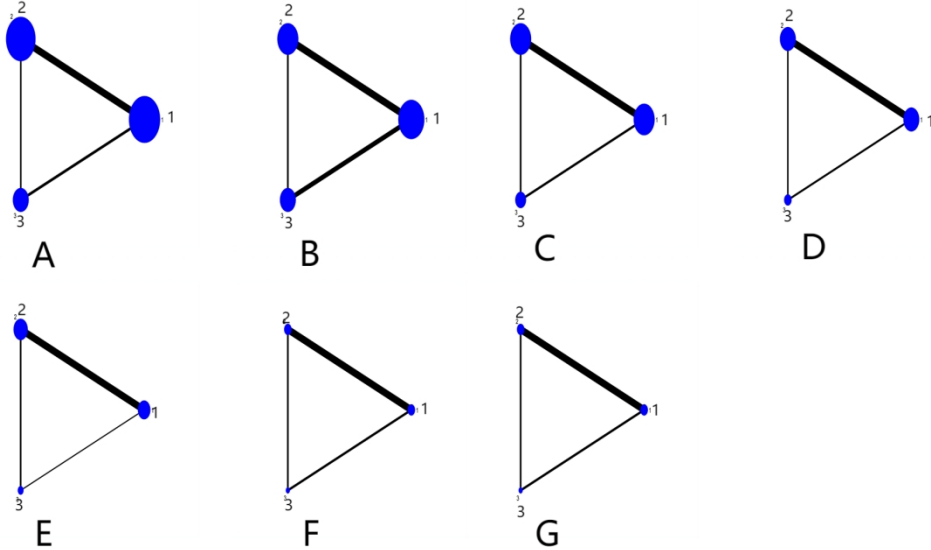

Fig3: Network plot of the direct comparisons of the outcomes for all included studies. The width of the lines is proportional to the number of trials comparing every pair of treatments, and the size of every node is proportional to the number of randomized participants (sample size). 1: Traditional positioning, 2: Ultrasound assistance, 3: Real-time guidance; A) First pass rate, B) First attempt rate; C) Identify time; D) Procedure time of spinal anesthesia; E) Subgroup 1 first pass rate; F) Subgroup 1 first attempt rate; G) Subgroup 2 first attempt rate

666x388mm (72 x 72 DPI)

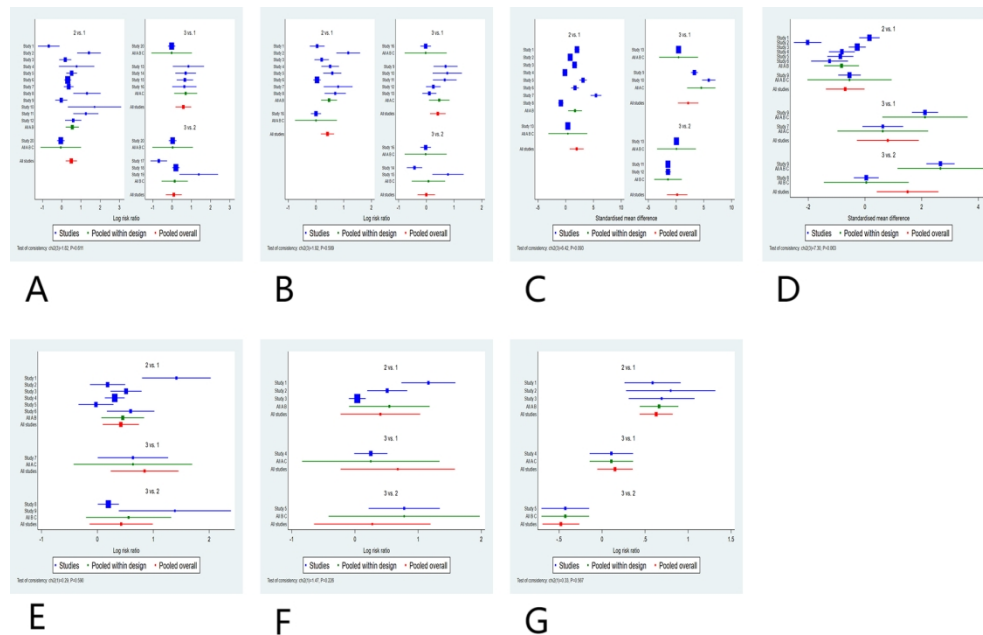

Fig4:Forest plot for all included studies.1: Traditional positioning,2:Ultrasound assistance, 3: Real-time guidance. A) First pass rate, B) First attempt rate; C) Identify time; D) Procedure time of spinal anaesthesia; E) Subgroup 1 first pass rate; F) Subgroup 1 first attempt rate; G) Subgroup 2 first attempt rate

666x423mm (72 x 72 DPI)

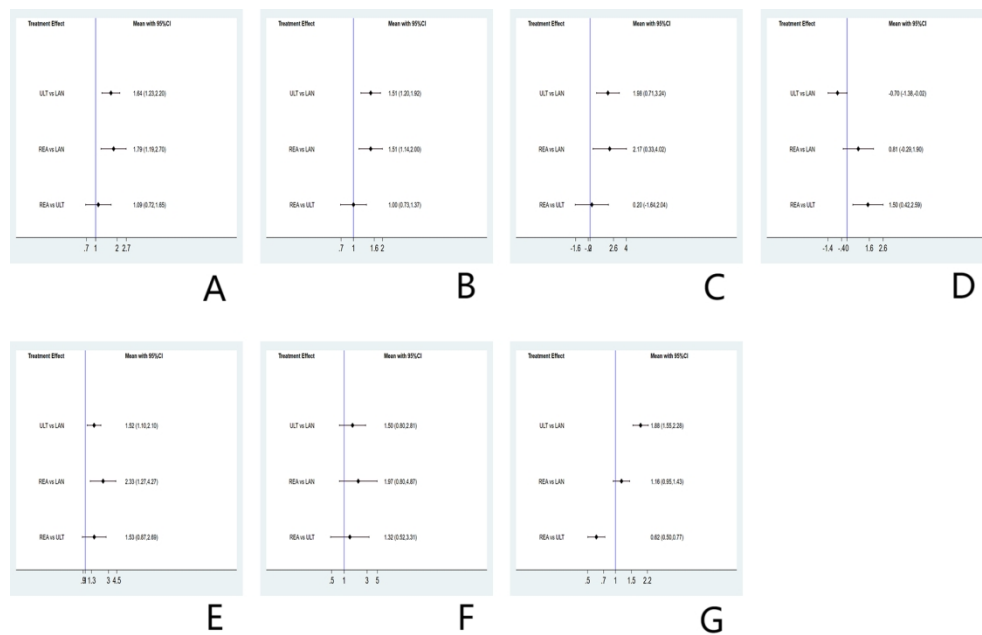

Fig5:Two-comparison forest diagram for all included studies.LAN:Traditional positioning,ULT:Ultrasound assistance, REA: Real-time guidance; A) First pass rate, B) First attempt rate; C) Identify time; D) Procedure time of spinal anesthesia; E) Subgroup 1 first pass rate; F) Subgroup 1 first attempt rate; G) Subgroup 2 first attempt rate

666x423mm (72 x 72 DPI)

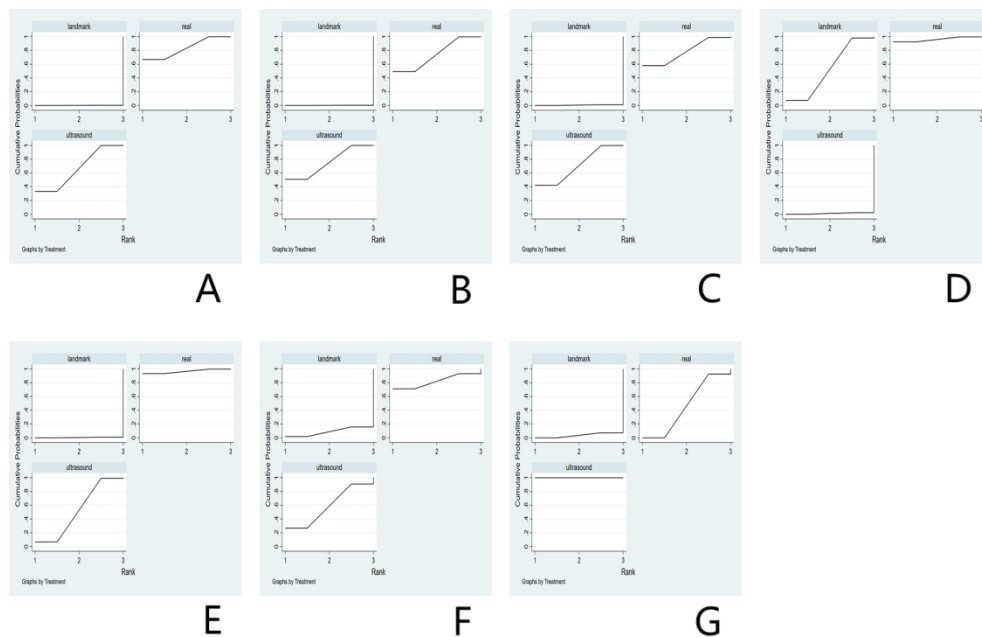

Fig6: Cumulative ranking curve of all included studies. landmark: Traditional positioning, ultrasound: Ultrasound assistance, real: Real-time guidance; A) First pass rate, B) First attempt rate; C) Identify time; D) Procedure time of spinal anesthesia; E) Subgroup 1 first pass rate; F) Subgroup 1 first attempt rate; G) Subgroup 2 first attempt rate

666x423mm (72 x 72 DPI)

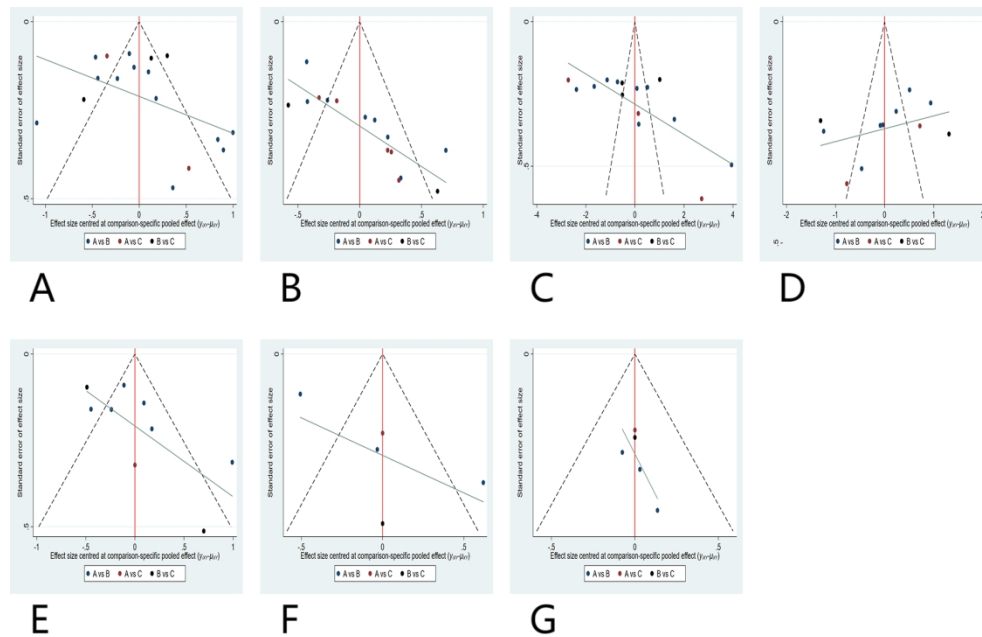

Fig7:funnel plots A) First pass rate, B) First attempt rate; C) Identify time; D) Procedure time of spinal anaesthesia; E) Subgroup 1 first pass rate; F) Subgroup 1 first attempt rate; G) Subgroup 2 first attempt rate

666x423mm (72 x 72 DPI)

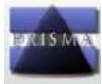

# PRISMA 2020 Checklist

| Section and Topic             | Item # | Checklist item                                                                                                                                                                                                                                                                                       | Location where item is reported |
|-------------------------------|--------|------------------------------------------------------------------------------------------------------------------------------------------------------------------------------------------------------------------------------------------------------------------------------------------------------|---------------------------------|
| <b>TITLE</b>                  |        |                                                                                                                                                                                                                                                                                                      |                                 |
| Title                         | 1      | Identify the report as a systematic review.                                                                                                                                                                                                                                                          | Page1                           |
| <b>ABSTRACT</b>               |        |                                                                                                                                                                                                                                                                                                      |                                 |
| Abstract                      | 2      | See the PRISMA 2020 for Abstracts checklist.                                                                                                                                                                                                                                                         | Page1                           |
| <b>INTRODUCTION</b>           |        |                                                                                                                                                                                                                                                                                                      |                                 |
| Rationale                     | 3      | Describe the rationale for the review in the context of existing knowledge.                                                                                                                                                                                                                          | Page1                           |
| Objectives                    | 4      | Provide an explicit statement of the objective(s) or question(s) the review addresses.                                                                                                                                                                                                               | Page1                           |
| <b>METHODS</b>                |        |                                                                                                                                                                                                                                                                                                      |                                 |
| Eligibility criteria          | 5      | Specify the inclusion and exclusion criteria for the review and how studies were grouped for the syntheses.                                                                                                                                                                                          | Page2                           |
| Information sources           | 6      | Specify all databases, registers, websites, organisations, reference lists and other sources searched or consulted to identify studies. Specify the date when each source was last searched or consulted.                                                                                            | Page2                           |
| Search strategy               | 7      | Present the full search strategies for all databases, registers and websites, including any filters and limits used.                                                                                                                                                                                 | Page2                           |
| Selection process             | 8      | Specify the methods used to decide whether a study met the inclusion criteria of the review, including how many reviewers screened each record and each report retrieved, whether they worked independently, and if applicable, details of automation tools used in the process.                     | Page3                           |
| Data collection process       | 9      | Specify the methods used to collect data from reports, including how many reviewers collected data from each report, whether they worked independently, any processes for obtaining or confirming data from study investigators, and if applicable, details of automation tools used in the process. | Page3                           |
| Data items                    | 10a    | List and define all outcomes for which data were sought. Specify whether all results that were compatible with each outcome domain in each study were sought (e.g. for all measures, time points, analyses), and if not, the methods used to decide which results to collect.                        | Page3                           |
|                               | 10b    | List and define all other variables for which data were sought (e.g. participant and intervention characteristics, funding sources). Describe any assumptions made about any missing or unclear information.                                                                                         | Page3                           |
| Study risk of bias assessment | 11     | Specify the methods used to assess risk of bias in the included studies, including details of the tool(s) used, how many reviewers assessed each study and whether they worked independently, and if applicable, details of automation tools used in the process.                                    | Page3                           |
| Effect measures               | 12     | Specify for each outcome the effect measure(s) (e.g. risk ratio, mean difference) used in the synthesis or presentation of results.                                                                                                                                                                  | Page3                           |
| Synthesis methods             | 13a    | Describe the processes used to decide which studies were eligible for each synthesis (e.g. tabulating the study intervention characteristics and comparing against the planned groups for each synthesis (item #5)).                                                                                 | Page3                           |
|                               | 13b    | Describe any methods required to prepare the data for presentation or synthesis, such as handling of missing summary statistics, or data conversions.                                                                                                                                                | Page3                           |
|                               | 13c    | Describe any methods used to tabulate or visually display results of individual studies and syntheses.                                                                                                                                                                                               |                                 |
|                               | 13d    | Describe any methods used to synthesize results and provide a rationale for the choice(s). If meta-analysis was performed, describe the model(s), method(s) to identify the presence and extent of statistical heterogeneity, and software package(s) used.                                          | Page3                           |
|                               | 13e    | Describe any methods used to explore possible causes of heterogeneity among study results (e.g. subgroup analysis, meta-regression).                                                                                                                                                                 | Page3                           |
|                               | 13f    | Describe any sensitivity analyses conducted to assess robustness of the synthesized results.                                                                                                                                                                                                         |                                 |
| Reporting bias assessment     | 14     | Describe any methods used to assess risk of bias due to missing results in a synthesis (arising from reporting biases).                                                                                                                                                                              | Page6                           |
| Certainty assessment          | 15     | Describe any methods used to assess certainty (or confidence) in the body of evidence for an outcome.                                                                                                                                                                                                | Page6                           |



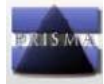

## PRISMA 2020 Checklist

| Section and Topic                              | Item # | Checklist item                                                                                                                                                                                                                                                                       | Location where item is reported |
|------------------------------------------------|--------|--------------------------------------------------------------------------------------------------------------------------------------------------------------------------------------------------------------------------------------------------------------------------------------|---------------------------------|
| <b>RESULTS</b>                                 |        |                                                                                                                                                                                                                                                                                      |                                 |
| Study selection                                | 16a    | Describe the results of the search and selection process, from the number of records identified in the search to the number of studies included in the review, ideally using a flow diagram.                                                                                         | Page4                           |
|                                                | 16b    | Cite studies that might appear to meet the inclusion criteria, but which were excluded, and explain why they were excluded.                                                                                                                                                          |                                 |
| Study characteristics                          | 17     | Cite each included study and present its characteristics.                                                                                                                                                                                                                            | Page5                           |
| Risk of bias in studies                        | 18     | Present assessments of risk of bias for each included study.                                                                                                                                                                                                                         | Page6                           |
| Results of individual studies                  | 19     | For all outcomes, present, for each study: (a) summary statistics for each group (where appropriate) and (b) an effect estimate and its precision (e.g. confidence/credible interval), ideally using structured tables or plots.                                                     | Page6                           |
| Results of syntheses                           | 20a    | For each synthesis, briefly summarise the characteristics and risk of bias among contributing studies.                                                                                                                                                                               | Page7                           |
|                                                | 20b    | Present results of all statistical syntheses conducted. If meta-analysis was done, present for each the summary estimate and its precision (e.g. confidence/credible interval) and measures of statistical heterogeneity. If comparing groups, describe the direction of the effect. | Page7                           |
|                                                | 20c    | Present results of all investigations of possible causes of heterogeneity among study results.                                                                                                                                                                                       | Page7                           |
|                                                | 20d    | Present results of all sensitivity analyses conducted to assess the robustness of the synthesized results.                                                                                                                                                                           |                                 |
| Reporting biases                               | 21     | Present assessments of risk of bias due to missing results (arising from reporting biases) for each synthesis assessed.                                                                                                                                                              |                                 |
| Certainty of evidence                          | 22     | Present assessments of certainty (or confidence) in the body of evidence for each outcome assessed.                                                                                                                                                                                  | Page7                           |
| <b>DISCUSSION</b>                              |        |                                                                                                                                                                                                                                                                                      |                                 |
| Discussion                                     | 23a    | Provide a general interpretation of the results in the context of other evidence.                                                                                                                                                                                                    | Page8                           |
|                                                | 23b    | Discuss any limitations of the evidence included in the review.                                                                                                                                                                                                                      | Page8                           |
|                                                | 23c    | Discuss any limitations of the review processes used.                                                                                                                                                                                                                                |                                 |
|                                                | 23d    | Discuss implications of the results for practice, policy, and future research.                                                                                                                                                                                                       | Page8                           |
| <b>OTHER INFORMATION</b>                       |        |                                                                                                                                                                                                                                                                                      |                                 |
| Registration and protocol                      | 24a    | Provide registration information for the review, including register name and registration number, or state that the review was not registered.                                                                                                                                       | Page9                           |
|                                                | 24b    | Indicate where the review protocol can be accessed, or state that a protocol was not prepared.                                                                                                                                                                                       | Page9                           |
|                                                | 24c    | Describe and explain any amendments to information provided at registration or in the protocol.                                                                                                                                                                                      |                                 |
| Support                                        | 25     | Describe sources of financial or non-financial support for the review, and the role of the funders or sponsors in the review.                                                                                                                                                        | Page9                           |
| Competing interests                            | 26     | Declare any competing interests of review authors.                                                                                                                                                                                                                                   | Page9                           |
| Availability of data, code and other materials | 27     | Report which of the following are publicly available and where they can be found: template data collection forms; data extracted from included studies; data used for all analyses; analytic code; any other materials used in the review.                                           | Page9                           |

# BMJ Open

## Comparison of ultrasound-guided and traditional localization in intraspinal anesthesia: a systematic review and network meta-analysis

|                                 |                                                                                                                                                                                                                                                                                                                                                                                                                                                                                                                                                                                                                                                  |
|---------------------------------|--------------------------------------------------------------------------------------------------------------------------------------------------------------------------------------------------------------------------------------------------------------------------------------------------------------------------------------------------------------------------------------------------------------------------------------------------------------------------------------------------------------------------------------------------------------------------------------------------------------------------------------------------|
| Journal:                        | <i>BMJ Open</i>                                                                                                                                                                                                                                                                                                                                                                                                                                                                                                                                                                                                                                  |
| Manuscript ID                   | bmjopen-2022-071253.R1                                                                                                                                                                                                                                                                                                                                                                                                                                                                                                                                                                                                                           |
| Article Type:                   | Original research                                                                                                                                                                                                                                                                                                                                                                                                                                                                                                                                                                                                                                |
| Date Submitted by the Author:   | 13-Jul-2023                                                                                                                                                                                                                                                                                                                                                                                                                                                                                                                                                                                                                                      |
| Complete List of Authors:       | Zhang, Yinzhou; Guangzhou University of Traditional Chinese Medicine First Affiliated Hospital<br>Wei, Junying; Guangzhou University of Traditional Chinese Medicine First Affiliated Hospital<br>Huang, Jieling; Guangzhou University of Traditional Chinese Medicine First Affiliated Hospital<br>Ma, WuHua; Guangzhou University of Traditional Chinese Medicine First Affiliated Hospital, The First Affiliated Hospital of Guangzhou University of Chinese Medicine<br>Li, Yuhui; Guangzhou University of Traditional Chinese Medicine First Affiliated Hospital, The First Affiliated Hospital of Guangzhou University of Chinese Medicine |
| <b>Primary Subject Heading</b>: | Anaesthesia                                                                                                                                                                                                                                                                                                                                                                                                                                                                                                                                                                                                                                      |
| Secondary Subject Heading:      | Anaesthesia                                                                                                                                                                                                                                                                                                                                                                                                                                                                                                                                                                                                                                      |
| Keywords:                       | Ultrasonography, Adult anaesthesia < ANAESTHETICS, Adult surgery < SURGERY                                                                                                                                                                                                                                                                                                                                                                                                                                                                                                                                                                       |
|                                 |                                                                                                                                                                                                                                                                                                                                                                                                                                                                                                                                                                                                                                                  |

SCHOLARONE™  
Manuscripts

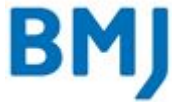

I, the Submitting Author has the right to grant and does grant on behalf of all authors of the Work (as defined in the below author licence), an exclusive licence and/or a non-exclusive licence for contributions from authors who are: i) UK Crown employees; ii) where BMJ has agreed a CC-BY licence shall apply, and/or iii) in accordance with the terms applicable for US Federal Government officers or employees acting as part of their official duties; on a worldwide, perpetual, irrevocable, royalty-free basis to BMJ Publishing Group Ltd ("BMJ") its licensees and where the relevant Journal is co-owned by BMJ to the co-owners of the Journal, to publish the Work in this journal and any other BMJ products and to exploit all rights, as set out in our [licence](#).

The Submitting Author accepts and understands that any supply made under these terms is made by BMJ to the Submitting Author unless you are acting as an employee on behalf of your employer or a postgraduate student of an affiliated institution which is paying any applicable article publishing charge ("APC") for Open Access articles. Where the Submitting Author wishes to make the Work available on an Open Access basis (and intends to pay the relevant APC), the terms of reuse of such Open Access shall be governed by a Creative Commons licence – details of these licences and which [Creative Commons](#) licence will apply to this Work are set out in our licence referred to above.

Other than as permitted in any relevant BMJ Author's Self Archiving Policies, I confirm this Work has not been accepted for publication elsewhere, is not being considered for publication elsewhere and does not duplicate material already published. I confirm all authors consent to publication of this Work and authorise the granting of this licence.

Comparison of ultrasound-guided and traditional localization in intraspinal anesthesia: a systematic review and network meta-analysis

Yin-Zhou Zhang 1†, Jun-ying Wei 1†, Jie-ling Huang 1, Wu-Hua Ma 1, Yu-Hui Li 1\*

1. Department of Anesthesiology, The First Affiliated Hospital of Guangzhou

University of Chinese Medicine. † : Co-first author, \* : Corresponding Author

Corresponding author: Yuhui Li; E-mail: liliuyuhui@126.com

### Abstract

**Objectives:** The optimal puncture technique for intraspinal anesthesia in different populations is unknown. We sought to obtain data from a randomized controlled trial comparing the effect of ultrasound-guided techniques and conventional positioning techniques on the success rate of puncture for intraspinal anesthesia.

**Design:** Systematic evaluation and network meta-analysis using study population, interventions, comparison of interventions, outcome indicators, and study type.

**Data sources:** PubMed, Embase, Cochrane Library, and Web of science were searched for through September 31, 2022.

**Eligibility Criteria:** We included randomized controlled trials comparing three types of intraspinal anesthesia: ultrasound-assisted, ultrasound real-time guided, and conventional positioning, to describe which is best for patients undergoing intraspinal anesthesia and the recommended intraspinal anesthesia for different populations.

**Data extraction and synthesis:** five independent reviewers used standardized methods to retrieve, screen, and edit the included studies. Risk bias was assessed using the Cochrane Collaboration and Evidence Project tools. Network meta-analysis was performed using STATA 15 statistical software.

**Results:** Twenty-two studies containing three different interventions were included. The SUCRA values for first-pass success rates for the three intraspinal anesthesia methods were real-time guidance (82.8%), ultrasound-assisted (67.1%), and conventional positioning (0.1%). Compared with traditional positioning, two ultrasound techniques improve the first-pass success rate, but there was no significant difference between them. Subgroup analysis showed that the use of ultrasound real-time guided spinal anesthesia in pregnant women and obese patients improved the first-pass success rate. The success rate of first attempt in elderly patients with lumbar anatomical abnormalities can be improved by ultrasound-assisted techniques.

**Conclusion:** Compared with conventional positioning, ultrasound-guided technique can improve the success rate of the first puncture of intraspinal anesthesia, but there was no significant difference between ultrasound-assisted and real-time guidance techniques. The results of subgroup analysis tell us that the most suitable intraspinal anesthesia methods are different for different populations.

PROSPERO number: CRD42022376041

### Strengths and limitations of this study:

1. To the best of our knowledge, this is the first study to compare three types of intraspinal anesthesia with a systematic review and network meta-analysis.

2. This study will help clinical anesthesiologists to choose the appropriate intraspinal anesthesia

1  
2  
3 for different populations

4 3. Due to the technical difficulty of real-time ultrasound guidance and the lack of evidence from  
5 clinically relevant studies, this may be one of the main limitations of this meta-analysis.  
6

## 7 1. Introduction

8 As a commonly used method of anesthesia, intraspinal anesthesia is traditionally performed  
9 by manually touching the body markers to determine the puncture location. In recent years  
10 ultrasound techniques have been increasingly used in intraspinal anesthesia [1]. There are two  
11 types of ultrasound techniques currently used in intraspinal anesthesia: ultrasound-assisted and  
12 ultrasound real-time guidance techniques. The preoperative ultrasound scan helps to identify the  
13 puncture point and estimate the depth of puncture, while the ultrasound real-time guidance  
14 technique (puncture under ultrasound visualization) allows a more accurate observation of the  
15 position and trajectory of the needle entry. Some of the existing studies have compared the use  
16 of ultrasound-assisted techniques with conventional localization methods, and some studies  
17 have compared ultrasound real-time guidance techniques with conventional localization  
18 methods. However, few studies have compared between these two ultrasound techniques.  
19 Chen's study noted a higher first puncture success rate and higher patient satisfaction with  
20 ultrasound-assisted intraspinal anesthesia than real-time guidance techniques in hip surgery in  
21 elderly patients [2], while Parli noted a shorter operative time and higher first puncture success  
22 rate with ultrasound real-time guidance for intraspinal anesthesia in lower extremity surgery in  
23 obese patients [3]. There is controversy as to which of these three methods of endotracheal  
24 anesthesia is most effective. Therefore, we reviewed articles comparing conventional  
25 positioning, ultrasound-assisted, and real-time guidance techniques used in intraspinal  
26 anesthesia. A systematic evaluation of the three methods of intraspinal anesthesia was  
27 performed through a network meta-analysis.  
28

## 29 2. Materials and Methods

30 We followed the recommendations of the Preferred Reporting Items for Systematic Reviews  
31 and Meta-Analyses (PRISMA) [4] to register meta-analyses and systematic reviews to the  
32 PROSPERO database and to the PROSPERO network on November 28, 2022 (registration number:  
33 CRD42022376041). The current network meta-analysis (NMA) is based on the scheme  
34 recommended by the Cochrane Collaboration [5] and follows the preferred reporting items of  
35 the systematic review and meta-analysis guidelines [6].

### 36 2.1. Search strategy

37 We searched PubMed, EMBase, Web of Science, and Cochrane Library databases for all  
38 relevant articles up to September 31, 2022. Keywords: "ultrasound real-time guidance",  
39 "ultrasound-assisted", "landmark palpation", "conventional positioning", "epidural anesthesia,"  
40 "spinal anesthesia," and "combined lumbar and epidural anesthesia. The search was performed  
41 using a combination of subject terms and free words. The complete search strategy can be found  
42 in the supplement.  
43

### 44 2.2. Inclusion and exclusion criteria

45 We included randomized controlled trials (RCTs) and compared two or three methods of  
46 intraspinal anesthesia. The information is as follows: study population: intraspinal anesthesia  
47 including epidural, spinal, and combined lumbar and epidural anesthesia; intervention:  
48 conventional positioning, ultrasound-assisted positioning, or ultrasound real-time guidance;  
49 comparison of interventions: one method of intraspinal anesthesia; outcome indicators: primary  
50  
51  
52  
53  
54  
55  
56  
57  
58  
59  
60

1  
2  
3 outcome was first puncture success rate (defined as needle successfully performing epidural  
4 puncture in one attempt without reorientation); secondary outcomes were first attempt success  
5 rate ( defined as needle reaching the subarachnoid space in one insertion attempt and allowing  
6 for needle reorientation), identification time (time from operator touching the patient's skin to  
7 marking the puncture point on the skin and time from placing the probe on the skin to marking  
8 the puncture point) and puncture time (interval from skin contact with the needle to observation  
9 of cerebrospinal fluid flow from within the puncture needle); study design: randomized  
10 controlled trial.  
11  
12

13 Exclusion criteria were as follows: review articles, case reports, case series, letters to the  
14 editor, reviews, conference proceedings, laboratory science studies, and any other irrelevant  
15 studies, as well as studies that did not report results of interest.  
16

### 17 2.3. Study selection

18 Two authors, Yinzhou Zhang and Junying Wei, searched the database by the above search  
19 strategy, respectively. The type of randomized controlled trial or clinical trial was selected  
20 through the filter of the online database. The retrieved literature was saved and de-duplicated by  
21 the literature management software (NoteExpress). The screened literature was read through  
22 title and abstract one by one, and if the title and abstract matched the criteria, the full text was  
23 evaluated to see if the results of interest were reported. Yinzhou Zhang, Junying Wei, and Jieling  
24 Huang also discussed whether each study should be included or excluded to reach a consensus.  
25 The disagreement about inclusion or exclusion was resolved in a discussion with Yuhui Li and  
26 Wuhua Ma.  
27  
28

### 29 2.4. Data extraction

30 All relevant data from the included studies were extracted and entered into a standardized  
31 form by Yinzhou Zhang and Junying Wei independently and then cross-checked. The  
32 standardized table included the following items: title, first author's name, year of publication,  
33 study design, choice of anesthesia, type of procedure, risk of bias, body mass index, age, number  
34 of subjects, first-pass success rate, first-attempt success rate, time to identification, time to  
35 operation, intervention, and best intervention. Data extracted for age and body mass index were  
36 mean  $\pm$  standard deviation and median (interquartile spacing). When it comes to the  
37 presentation of data for outcome indicators in the study as quartile spacing, we followed the  
38 appropriate method for conversion [7-9] and finally used the mean  $\pm$  standard deviation for  
39 statistical analysis.  
40  
41

### 42 2.5. Study quality

43 Independent assessment was performed by Jie-Ling Huang and Wu-Hua Ma using the Risk  
44 of Bias tool in the Review Manager (version 5.3). Quality was assessed using the following  
45 possible sources of bias: random sequence generation, allocation concealment, participant and  
46 personnel blindness, outcome assessment blindness, incomplete outcome data, and selective  
47 reporting. The methods of each study were rated as "high", "low" or "unclear", reflecting the risk  
48 of bias [5].  
49  
50

### 51 2.6. Statistical analysis

52 Multiple treatment comparison NMA is a meta-analysis generalization method that includes  
53 direct and indirect randomized controlled trial comparisons of treatments. We used STATA 15  
54 software to download the network package for statistical analysis, using RR values for  
55 dichotomous variables effect values and SMD as effect values for continuous variables. The  
56  
57  
58  
59  
60

inconsistency model was used to test for consistency when the p-value was >0.05 and local inconsistency analysis was performed using the node splitting method. Ring inconsistency tests were performed for network plots that formed closed loops, and if the 95% CI did not contain 0 then sensitivity and subgroup analyses were required for large heterogeneity.

A network diagram linking all included studies is formed to indicate the type of intraspinal anesthesia, the number of patients in the different studies, and the number of pairwise comparisons. Nodes show the intraspinal anesthesia being compared, and edges show the direct comparisons available between methods of intraspinal anesthesia. Cumulative probability plots are plotted for each method of intraspinal anesthesia as well as two-by-two comparisons for each intervention. We used cumulative ranking area under the curve (SUCRA) values to present a hierarchy of first-pass success rates and first-attempt success rates for methods of intraspinal anesthesia. SUCRA is a relative ranking measure that statistically ranges from 0 to 100%, and it indicates the likelihood that the therapy will be rated as the best [10]. Higher SUCRA values are considered to be a better outcome for individual interventions.

## 2.7. Patient and Public Involvement

No patients participated in the study

## 3. Results

PubMed and EMBASE databases were searched, and 128 and 359 studies were initially evaluated. Also, we searched Web of science and Cochrane Library databases for 352 and 90 studies each, and a total of 929 publications were retrieved. Randomized controlled trials or clinical trials were screened using online database filters, and 692 studies were withdrawn. After removing duplicates using literature management software, 218 studies remained. The remaining studies were reviewed in detail for title, abstract, and full text; 184 of these studies were not available, and 20 studies were excluded because they did not have controls and 14 studies did not report outcomes of interest (Figure 1).

### 3.1. Research characteristics

The characteristics of the 22 studies are summarized in Table 1 and Table 2. All experiments were two- or three-armed. Of these, 13 studies compared ultrasound-assisted positioning with conventional positioning [11-23], five studies compared ultrasound real-time guidance with conventional positioning [24-28], and three studies compared the application of ultrasound-assisted positioning with real-time positioning to guide intraspinal anesthesia [2,19,3]. One study compared the use of three methods in spinal anesthesia [20]. Table 1 lists the first author and year of publication of the literature, as well as basic information, such as patient type, procedure, patient age, and body mass index, and Table 2 lists the anesthesia method, sample size of the study, intervention, primary outcome indicator (first pass success rate), and better outcome of the intervention. In all included studies, the probe used for ultrasound was a portable low-frequency convex array probe, excluding special puncture probes.

Table 1

| The author  | Time of<br>Public<br>ation | Type of patient | Type of surgery      | Age (& #, *)            | BMI (& #, *)           |
|-------------|----------------------------|-----------------|----------------------|-------------------------|------------------------|
| Karthikeyan | 2018                       | adult           | knee and hip surgery | 65.3±9.7#<br>68.2±10.3& | 30.1±6.4#<br>30.6±4.7& |



|                        |      |                                      |                             |                                  |                                |
|------------------------|------|--------------------------------------|-----------------------------|----------------------------------|--------------------------------|
| Sangeeta Dhangar       | 2018 | maternal                             | cesarean section            | 23.06±3.01#                      | 27.2±3.8#                      |
| Cristian Arzola        | 2015 | maternal                             | childbirth                  | 32.3±5.8#                        | 29±5.1#                        |
| Y. C. Lim              | 2014 | adult                                | lower limb surgery          | 61.1±13.3#                       | 25.4±5.6#                      |
| Chin                   | 2018 | maternal                             | cesarean section            | NM                               | 25.0±5.9                       |
|                        |      |                                      |                             |                                  | 30.2 <sup>a</sup> (27.0-36.5)# |
|                        |      |                                      |                             |                                  | 30.5 <sup>a</sup> (26.9-34.2)& |
| Bingdong Tao           | 2021 | maternal                             | cesarean section            | 32.3±5.2#                        | 28.3±3.0#                      |
| Mohd Anas Khan         | 2022 | orthopedic patient                   | lower limb surgery          | 54.5±12.8#                       | 29.3±4.6#                      |
| Mengzhu Li             | 2019 | obese patients                       | cesarean section            | 29.5±3.9#                        | NM                             |
|                        |      |                                      |                             | 30.1±4.5&                        |                                |
| Sun-Kyung Park         | 2019 | old age patient                      | lower limb surgery          | 71.1±7.2#                        | 25.8±3.1#                      |
|                        |      |                                      |                             | 71.2±6.1&                        | 25.8±3.1&                      |
| Mohamed Mohamed Tawfik | 2017 | maternal                             | cesarean section            | 27.7±4#                          | 29.2±3#                        |
|                        |      |                                      |                             | 26.7±3.8&                        | 29.2±2.9&                      |
| Sun-Kyung Park         | 2020 | anatomic abnormality of lumbar spine | lower limb surgery          | 70.5±8.8#                        | 26.1±3.2#                      |
|                        |      |                                      |                             | 66.5±13.2&                       | 25.9±2.9&                      |
| Bo Qu                  | 2020 | old age patient                      | hip surgery                 | 83.3±6.7#                        | 21.6±3.6#                      |
|                        |      |                                      |                             | 82.3±7.1&                        | 20.6±3.0&                      |
| Xiu Ni                 | 2021 | obese patients                       | cesarean section            | 31.8±4.8#                        | 33.5±2.1#                      |
|                        |      |                                      |                             | 31.4±4.2&                        | 33.0±2.1&                      |
| Bertam Tanya Mital     | 2017 | adult                                | lower limb surgery          | NM                               | NM                             |
|                        | 2021 | children                             | chest and abdominal surgery | 2.4±1.3*                         | NM                             |
|                        |      |                                      |                             | 3.0±1.7&                         |                                |
| Jatuporn Pakpirom      | 2020 | adult                                | chest and abdominal surgery | 60.0 <sup>a</sup> (51.0-67.0)    | 23.4±4.0*                      |
|                        |      |                                      |                             | *                                | 22.8±3.5&                      |
|                        |      |                                      |                             | 58.5 <sup>a</sup> (53.75-70.25)& |                                |
| Jindi Jiang            | 2021 | overweight mothers                   | childbirth                  | 29.2±3.1*                        | 35.6±2.0*                      |
|                        |      |                                      |                             | 28.4±3.4&                        | 35.2±2.4&                      |
| Hesham                 | 2017 | anatomic abnormality of lumbar spine | knee and hip surgery        | 69±10*                           | 34±11*                         |
|                        |      |                                      |                             | 70±10&                           | 33±8&                          |
| Luying Chen            | 2021 | old age patient                      | hip surgery                 | 82.7±6.6*                        | 21.9±3.1*                      |
|                        |      |                                      |                             | 84.5±6.2#                        | 21.3±3.4#                      |
| Yasser Mohamed         | 2020 | maternal                             | childbirth                  | 25.4±5.1*                        | 37.9±4.3*                      |
|                        |      |                                      |                             | 26.8±5.65#                       | 38.1±4.2#                      |



|                     |      |                |                    |                                                                            |                                                                      |
|---------------------|------|----------------|--------------------|----------------------------------------------------------------------------|----------------------------------------------------------------------|
| Parli Raghavan Ravi | 2021 | obese patients | lower limb surgery | 58.5 <sup>a</sup> (50.3, 65.8)<br>*<br>59.5 <sup>a</sup> (52.3, 65.8)<br># | 34.9 <sup>a</sup> (33.1, 36.35)*<br>34.9 <sup>a</sup> (33.1, 36.40)# |
| Deepak Bhardwaj     | 2022 | adult          | lower limb surgery | 39.66±13.27&<br>42.88±12.72#<br>43.6±15.24*                                | 22.8±2.8&<br>22.4±3.4#<br>23.9±3.0*                                  |

<sup>a</sup>:median(interquartile range) NM: no mention  
&:landmark group #: ultrasound assisted group \*:real time group  
E:Epidural anesthesia S:Spinal anesthesia CSE:Combined spinal and epidural anesthesia

Table 2

| The author       | Time of Publication | Method of anesthesia (E, S, CSE) | Sample size(&,#,*) | intervention                          | first pass success rate (%) | Effect Estimate (better) |
|------------------|---------------------|----------------------------------|--------------------|---------------------------------------|-----------------------------|--------------------------|
| Karthik eyan     | 2018                | S                                | 59#<br>60&         | Landmark vs<br>ultrasound<br>assisted | 43#<br>22&                  | ND                       |
| Sangeeta Dhanger | 2018                | S                                | 50#<br>50&         | Landmark vs<br>ultrasound<br>assisted | 18#<br>74&                  | ultrasound<br>assisted   |
| Cristina Arzola  | 2015                | E                                | 60#<br>68&         | Landmark vs<br>ultrasound<br>assisted | 50#<br>60&                  | ND                       |
| Y. C. Lim        | 2014                | S                                | 85#<br>85&         | Landmark vs<br>ultrasound<br>assisted | 7#<br>15&                   | ND                       |
| Chin             | 2018                | CSE                              | 105#<br>110&       | Landmark vs<br>ultrasound<br>assisted | 38.2#<br>63.8&              | ultrasound<br>assisted   |
| Bingdong Tao     | 2021                | CSE                              | 64#<br>64&         | Landmark vs<br>ultrasound<br>assisted | 68.8#<br>93.8&              | ultrasound<br>assisted   |
| Mohd Anas Khan   | 2022                | CSE                              | 50#<br>50&         | Landmark vs<br>ultrasound<br>assisted | 60#<br>86&                  | ultrasound<br>assisted   |
| Mengzhu Li       | 2019                | CSE                              | 40#<br>40&         | Landmark vs<br>ultrasound<br>assisted | 52.5#<br>87.5&              | ultrasound<br>assisted   |
| Sun-Kyung Park   | 2019                | S                                | 40#<br>40&         | Landmark vs<br>ultrasound<br>assisted | 17.5#<br>65.0&              | ultrasound<br>assisted   |

|                                                                                       |      |     |     |             |       |            |
|---------------------------------------------------------------------------------------|------|-----|-----|-------------|-------|------------|
| Mohamed                                                                               | 2017 | CSE | 53# | Landmark vs | 60#   | ND         |
| Mohamed                                                                               |      |     | 55& | ultrasound  | 58.5& |            |
| Tawfik                                                                                |      |     |     | assisted    |       |            |
| Sun-Kyu                                                                               | 2020 | S   | 22# | Landmark vs | 9.1#  | ultrasound |
| ng Park                                                                               |      |     | 22& | ultrasound  | 50&   | assisted   |
|                                                                                       |      |     |     | assisted    |       |            |
| Bo Qu                                                                                 | 2020 | CSE | 40# | Landmark vs | 20#   | ultrasound |
|                                                                                       |      |     | 40& | ultrasound  | 70&   | assisted   |
|                                                                                       |      |     |     | assisted    |       |            |
| Xiu Ni                                                                                | 2021 | CSE | 40# | Landmark vs | 40#   | ultrasound |
|                                                                                       |      |     | 40& | ultrasound  | 72.5& | assisted   |
|                                                                                       |      |     |     | assisted    |       |            |
| Bertam                                                                                | 2017 | S   | 30* | Landmark vs | 47*   | real time  |
|                                                                                       |      |     | 30& | real time   | 30&   |            |
| Tanya                                                                                 | 2021 | E   | 23* | Landmark vs | 82.6* | real time  |
| Mital                                                                                 |      |     | 22& | real time   | 40.9& |            |
| Jatupor                                                                               | 2020 | E   | 48* | Landmark vs | 68.6* | real time  |
| n                                                                                     |      |     | 48& | real time   | 35.4& |            |
| Pakpiro                                                                               |      |     |     |             |       |            |
| m                                                                                     |      |     |     |             |       |            |
| Jindi                                                                                 | 2021 | E   | 30* | Landmark vs | 56.7* | real time  |
| Jiang                                                                                 |      |     | 30& | real time   | 30&   |            |
| Hesham                                                                                | 2017 | S   | 14* | Landmark vs | 72.2* | ND         |
|                                                                                       |      |     | 18& | real time   | 83.3& |            |
| Luying                                                                                | 2021 | S   | 57* | ultrasound  | 31.6* | ultrasound |
| Chen                                                                                  |      |     | 57# | assisted vs | 63.2# | assisted   |
|                                                                                       |      |     |     | real time   |       |            |
| Yasser                                                                                | 2020 | E   | 50* | ultrasound  | 90*   | real time  |
| Mohamed                                                                               |      |     | 50# | assisted vs | 74#   |            |
|                                                                                       |      |     |     | real time   |       |            |
| Parli                                                                                 | 2021 | S   | 40* | ultrasound  | 40*   | real time  |
| Raghava                                                                               |      |     | 40# | assisted vs | 10#   |            |
| n Ravi                                                                                |      |     |     | real time   |       |            |
| Deepak                                                                                | 2022 | S   | 50& | Landmark vs | 82&   | ND         |
| Bhardwa                                                                               |      |     | 50# | ultrasound  | 78#   |            |
| j                                                                                     |      |     | 50* | assisted vs | 80*   |            |
|                                                                                       |      |     |     | real time   |       |            |
| ND:no difference                                                                      |      |     |     |             |       |            |
| &:landmark group #: ultrasound assisted group *:real time group                       |      |     |     |             |       |            |
| E:Epidural anesthesia S:Spinal anesthesia CSE:Combined spinal and epidural anesthesia |      |     |     |             |       |            |

### 3.2. Risk of bias assessment

The quality indicators of the included studies are shown in Figure 2. All studies were generated using a randomized sequence, and 12 of them had a hidden allocation. Thirteen of the

1  
2  
3 studies did not specify blinding of subjects. One study had a high risk of bias in terms of blinding  
4 the operator, which can be explained by the difficulty of blinding in the operation. Most of the  
5 studies did not have incomplete outcome data, but five of them had unspecified risks. All studies  
6 did not report outcomes selectively.  
7

### 8 3.3. Synthesis of results 9

10 For all results for each specific data, we give network plots, forest plots for individual  
11 studies, forest plots for two-by-two comparisons, and cumulative ranking curves. The results is  
12 shown in figures 1S to 7S. The results of inconsistency model detection, consistency analysis, local  
13 inconsistency analysis, ring inconsistency detection, and funnel plots can be found in the  
14 Supplementary file. The heterogeneity of the study is small from the model detection as well as  
15 the funnel plot.  
16

### 17 3.4. First pass success rate 18

19 The success rate of first pass of the needle was recorded in 19 two-arm studies and one  
20 three-arm study, which were pooled for analysis [2,3,11-17,19-27,29,30]. In all studies,  
21 conventional positioning was the most frequently referenced (Figure 1SA). In the present study,  
22 the puncture success rate in the ultrasound-assisted and real-time guidance groups appeared to  
23 be higher than that in the conventional localization group (Figure 1SB). However, there was no  
24 significant difference between the ultrasound-assisted group and the real-time guidance group  
25 (Figure 1SC). The probability of SUCRA for conventional localization, assisted localization, and  
26 real-time guidance was calculated by plotting the cumulative ranking graph (Figure 1SD).  
27 According to the SUCRA data, the highest first puncture success rate was achieved with real-time  
28 guidance (82.8%), followed by ultrasound-assisted (67.1%), and finally conventional localization  
29 (0.1%). The funnel diagram is shown in figure 1SE.  
30  
31

### 32 3.5. First attempt rate 33

34 A total of 16 trials provided data on first-attempt pass rates [2,3,11,12,14,18-22,24-28,30].  
35 The network node diagram is shown in Figure 2SA. The forest plot results showed that the use of  
36 ultrasound was associated with first attempt pass rates (Figure 2SB). However, there was no  
37 significant difference between ultrasound-assisted and real-time guidance (Figure 2SC).  
38 Cumulative ranking plots showed that ultrasound-assisted first attempt pass rate was the highest  
39 (75.3%), followed by real-time guidance (74.6%) and conventional positioning (0.1%) (Figure  
40 2SD). The funnel diagram is shown in Figure 2SE.  
41  
42

### 43 3.6. Identification time 44

45 Network plots, forest plots for individual studies are shown in figure 3SA and figure  
46 3SB. Meta-analysis results [2,3,11-12,17-19,21-23,26-27,30] showed that the conventional  
47 localization method had the shortest localization time (Figure 3SD), but there was no significant  
48 difference between ultrasound-assisted and real-time guided puncture localization time (Figure  
49 3SC). The funnel diagram is shown in Figure 3SE.  
50

### 51 3.7. Duration of spinal anesthesia 52

53 A total of nine studies, eight two-arm studies and one three-arm study  
54 [3,11,12,14,18,19,21,28,30], were collected to compare the entire spinal anesthesia procedure,  
55 from puncture needle contact with the skin to cerebrospinal fluid flow. Network plots, forest  
56 plots for individual studies are shown in figure 4SA and figure 4SB. The combined analysis showed  
57 that ultrasound-assisted surgery time was the shortest (Figure 4SD), and there was no significant  
58 difference between the real-time guidance group and the conventional localization group (Figure  
59  
60

1  
2  
3 4SC).The funnel diagram is shown in Figure 4SE.

#### 4 3.8.Subgroup analysis

5  
6 In the first subgroup, we included 9 studies of obese adults and pregnant women (obese  
7 or not). The results of first pass success rates [3,12,13,15, 16,20,23,27,29] and first attempt  
8 success rates [3,12,18,20,27] are analyzed. For the first pass success rate, network plots(Figure  
9 5SA), forest plots for individual studies(Figure 5SB), forest plots for two-by-two  
10 comparisons(Figure 5SC), cumulative ranking curves(Figure 5SD) and funnel diagram(Figure 5SE)  
11 are shown.For the first puncture success rate, network plots(Figure 6SA), forest plots for  
12 individual studies(Figure 6SB), forest plots for two-by-two comparisons(Figure 6SC), cumulative  
13 ranking curves(Figure 6SD) and funnel diagram(Figure 6SE) are shown.

14  
15 In a second subgroup analysis, we included patients with a mean age over 70 years,  
16 including lumbar anatomical abnormalities (previous lumbar spine surgery or scoliosis)  
17 [2,19,21,22,28].Network plots, forest plots for individual studies are shown in figure 7SA and  
18 figure 7SB. The meta-analysis and combined results showed that the first attempt pass rate  
19 appeared to be higher in the ultrasound-assisted group (Figure 7SC), and the cumulative ranking  
20 chart also showed that ultrasound assistance was the most recommended (Figure 7SD).The  
21 funnel diagram is shown in Figure 7SE.

#### 22 Discussion

23  
24 In recent years, there has been increasing interest in ultrasound guidance for lumbar,  
25 epidural, or combined lumbar and epidural anesthesia [31-33]. Studies support the use of this  
26 technique to improve puncture success and reduce complications [34-35]. The National Institute  
27 for Health and Clinical Excellence (NICE) in the UK has published guidelines [36] suggesting that  
28 ultrasound can be used both as a preoperative assessment tool and to perform punctures in real  
29 time.

30  
31 The two main indicators of the difficulty of intraspinal anesthesia are the number of needle  
32 transfers required for successful puncture and the time required for the entire procedure.  
33 Multiple needle punctures are an independent predictor of complications, such as penetration of  
34 the dura, injury to blood vessels, and sensory abnormalities [37]. Ideal intraspinal anesthesia  
35 requires a single successful puncture [24]. Minimizing the number of attempts can help reduce  
36 the risk of complications and improve patient satisfaction [38]. Previous studies have shown that  
37 pre-puncture ultrasound scanning can improve puncture success and reduce the number of  
38 punctures [39]. The real-time guidance technique is characterized by real-time observation of the  
39 needle trajectory during puncture, which improves the puncture success rate [24,40-42]. This is  
40 consistent with our analysis.

41  
42 However, the analysis showed no significant difference between ultrasound-assisted and  
43 real-time guidance in terms of first puncture success rate and first attempt success rate.  
44 However, subgroup analysis revealed that the real-time guidance technique was more  
45 advantageous for maternal and obese populations. Ultrasound-assisted techniques are more  
46 recommended for older patients and those with abnormal spinal anatomy.

47  
48 We analyze the reasons for this discrepancy. Pregnant and obese patients have difficulty  
49 achieving the ideal puncture position during intraspinal anesthesia, and difficulties in palpation  
50 may lead to an increased number of punctures, resulting in patient discomfort or puncture  
51 failure [43]. During pregnancy, the anterior lumbar protrusion increases and the pelvis enlarges  
52 and rotates, resulting in a deeper and narrower epidural space and a narrower "safety zone"  
53  
54  
55  
56  
57  
58  
59  
60

1  
2  
3 between the ligamentum flavum and the dura [44]. These individuals are generally younger,  
4 have softer lumbar ligaments and a clear muscle-fat demarcation, and the anterior-posterior  
5 complex can be clearly visualized under ultrasound, which can significantly reduce the number of  
6 needle transfers and is suitable for real-time guidance techniques [34,45]. However, there are  
7 difficulties in real-time puncture for elderly patients. Due to vertebral and ligamentous  
8 hyperplasia and narrowing of the vertebral space in elderly patients, the normal ultrasound  
9 probe is more likely to block the puncture needle path, thus affecting the observation of the  
10 real-time trajectory of the puncture needle. The advantage of ultrasound-assisted localization is  
11 that it can shorten the anesthesia operation time. Studies have shown that real-time guidance  
12 techniques are not superior to ultrasound-assisted localization because real-time guidance  
13 requires a longer operative time, especially in elderly patients, which can decrease satisfaction  
14 scores [2].

15  
16 Of course, we cannot ignore the other factors that influenced our results. The puncture  
17 paths used by the investigators were not entirely consistent. According to previous studies [46],  
18 the paramedian puncture path is superior to the median position because it avoids the  
19 supraspinous and interspinous ligaments, whereas ligamentous calcification can make puncture  
20 more difficult for the operator and increase the number of attempts. Not to be overlooked is the  
21 experience of the operator. The operators in the included literature were almost always  
22 anesthesiologists skilled in the application of ultrasound techniques for intraspinal anesthesia.  
23 The seniority of the anesthesiologist is also a factor in the success rate, and its effect may  
24 influence the puncture success rate and thus exaggerate the advantages of ultrasound-guided  
25 techniques [47]. In addition, the real-time ultrasound guidance technique is difficult and requires  
26 the operator to hold the probe and ensure image stability while observing the needle trajectory.  
27 This is also a challenge for anesthesiologists with years of experience in ultrasound-assisted  
28 localization. This technical difference also influenced our results. On the other hand, the choice  
29 of ultrasound probe can also affect real-time guided puncture. Due to the common  
30 low-frequency convex array probe, the contact surface of the probe does not completely fit the  
31 skin and the curved housing of the probe blocks the angle of the needle during the puncture.  
32 Recently, TranD was performed using a new puncture probe [45]. The probe is equipped with an  
33 epidural needle holder on the side, which allows adjustment of the needle angle in the plane of  
34 the probe. Based on the pre-positioned vertebral space and the pre-set needle entry angle, the  
35 operator only needs to pay attention to the depth of needle insertion to complete the puncture.  
36 This method keeps the needle in the same plane as the probe so that the needle trajectory is  
37 always visible.

38  
39 This study also has some limitations. Due to the difficulty of real-time guidance techniques,  
40 there are fewer studies in this area and contain smaller sample sizes than assisted localization,  
41 which can also affect our analysis. Therefore, our results cannot be extrapolated to other related  
42 studies.

#### 43 Conclusion

44  
45 This study showed a significant advantage of ultrasound guidance technique in improving  
46 the first puncture success rate of intraspinal anesthesia. In addition, subgroup analysis showed  
47 that real-time ultrasound guidance had a significant advantage in terms of first puncture success  
48 rate. Ultrasound-assisted techniques are more appropriate for pregnant and obese patients, and  
49 ultrasound-assisted techniques are more appropriate for older patients with anatomical  
50  
51  
52  
53  
54  
55  
56  
57  
58  
59  
60

1  
2  
3 abnormalities of the lumbar spine. Current research evidence is insufficient, mainly because  
4 study designs vary and real-time guidance techniques are difficult and currently less studied.  
5 Future studies should focus on real-time ultrasound-guided techniques and expand the  
6 application of visualization techniques in intraspinal anesthesia.  
7  
8  
9

10 Acknowledgements : The authors would like to thank the teachers of the Department of  
11 Anesthesiology, the First Affiliated Hospital of Guangzhou University of Chinese Medicine for  
12 their help.

13 Contributors:Yinzhou Zhang, Jieling Huang, Junying Wei, Wuhua Ma and Yuhui Li were involved  
14 in the design and conception of the research scheme.Yinzhou Zhang and Junying Wei will screen  
15 the title, abstract and full text.If disagreement arises on inclusion or exclusion, it will be resolved  
16 through discussion with other authors (Jieling Huang,Wuhua Ma and/or Yuhui Li).Yinzhou Zhang  
17 and Junying Wei will extract data from the article independently, and third party reviewers  
18 (Jieling Huang and/or Wuhua Ma) will check the integrity and correctness of the extracted data  
19 in the results evaluation.All authors drafted and revised this research protocol and approved it  
20 for publication.  
21  
22

23 Funding:This work was fully supported by the Department of Anesthesiology, the First Affiliated  
24 Hospital of Guangzhou University of Chinese Medicine.

25 Competing interests: None declared.

26 Data availability statement: No additional data available.

27 Provenance and peer review : Not commissioned; externally peer reviewed.

28 Ethics and dissemination: There were no human participants in this study and there is no ethics  
29 statement.  
30

31 PROSPERO registration number:CRD42022376041  
32  
33

### 34 Figure explanation

35 Fig.1.Flow diagram

36 Fig.2.Consensus risk-of-bias assessment of the included studies.

37 Green = low risk; yellow = unclear; red =high risk.

38 Fig.1S: Results of first pass success rate

39 A:Network plots(The width of the lines is proportional to the number of trials comparing every  
40 pair of treatments, and the size of every node is proportional to the number of randomized  
41 participants. 1: Traditional positioning,2:Ultrasound assistance, 3: Real-time guidance)

42 B:Forest plot for all included studies(1: Traditional positioning,2:Ultrasound assistance, 3:  
43 Real-time guidance)

44 C:Two-comparison forest diagram for all included studies(LAN:Traditional  
45 positioning,ULT:Ultrasound assistance, REA: Real-time guidance)

46 D:Cumulative ranking curve of all included studies(landmark:Traditional  
47 positioning,ultrasound:Ultrasound assistance, real: Real-time guidance)

48 E:funnel plots(A:Traditional positioning,B:Ultrasound assistance, C: Real-time guidance)

49 Fig.2S: Results of first attempt rate

50 Fig.3S: Results of identify time

51 Fig.4S: Results of procedure time of spinal anesthesia

52 Fig.5S: Results of subgroup 1 first pass rate  
53  
54  
55  
56  
57  
58  
59  
60

1  
2  
3 Fig.6S: Results of subgroup 1 first attempt rate

4 Fig.7S: Results of subgroup 2 first attempt rate

5  
6  
7 Reference:

8 [1].Tran D, Kamani AA, Lessoway VA, Peterson C, Hor KW, Rohling RN.Preinsertion paramedian  
9 ultrasound guidance for epidural anesthesia. *Anesth Analg* 2009; 109: 661 – 7

10 [2].Chen L, Huang J, Zhang Y, Qu B, Wu X, Ma W, Li Y. Real-Time Ultrasound-Guided Versus  
11 Ultrasound-Assisted Spinal Anesthesia in Elderly Patients With Hip Fractures: A Randomized  
12 Controlled Trial. *Anesth Analg*. 2022 Feb 1;134(2):400-409.

13 [3].Ravi PR, Naik S, Joshi MC, Singh S. Real-time ultrasound-guided spinal anaesthesia vs pre-  
14 procedural ultrasound-guided spinal anaesthesia in obese patients. *Indian J Anaesth*. 2021  
15 May;65(5):356-361.

16 [4].Salanti G. Indirect and mixed-treatment comparison, network, or multiple-treatments  
17 meta-analysis: many names, many benefits, many concerns for the next generation evidence  
18 synthesis tool. *Res Synth Methods* 2012;3:80–97.

19 [5].Higgins JPT, Green S. *Cochrane Collaboration. Cochrane handbook for systematic reviews of*  
20 *interventions*. Chichester, England; Hoboken, NJ: Wiley-Blackwell; 2008.

21 [6].Hutton B, Salanti G, Caldwell DM, Chaimani A, Schmid CH, Cameron C, et al. The PRISMA  
22 extension statement for reporting of systematic reviews incorporating network meta-analyses of  
23 health care interventions: checklist and explanations. *Ann Intern Med* 2015;162:777 – 84.

24 [7].J. Shi, D. Luo, H. Weng, X. Zeng, L. Lin, H. Chu and T. Tong\* (2020), "Optimally estimating the  
25 sample standard deviation from the five-number summary", *Research Synthesis Methods*, 11:  
26 641-654.

27 [8].D. Luo, X. Wan, J. Liu and T. Tong\* (2018), "Optimally estimating the sample mean from the  
28 sample size, median, mid-range and/or mid-quartile range", *Statistical Methods in Medical*  
29 *Research*, 27: 1785-1805.

30 [9].X. Wan, W. Wang, J. Liu and T. Tong\* (2014), "Estimating the sample mean and standard  
31 deviation from the sample size, median, range and/or interquartile range", *BMC Medical*  
32 *Research Methodology*, 14: 135.

33 [10].Salanti G, Ades AE, Ioannidis JP. Graphical methods and numerical summaries for presenting  
34 results from multiple-treatment meta-analysis: an overview and tutorial. *J Clin Epidemiol*  
35 2011;64:163–71.

36 [11].Srinivasan KK, Leo AM, Iohom G, Loughnane F, Lee PJ. Pre-procedure ultrasound-guided  
37 paramedian spinal anaesthesia at L5-S1: Is this better than landmark-guided midline approach? A  
38 randomised controlled trial. *Indian J Anaesth*. 2018 Jan;62(1):53-60.

39 [12].Dhanger S, Vinayagam S, Vaidhyanathan B, Rajesh IJ, Tripathy DK. Comparison of landmark  
40 versus pre-procedural ultrasonography-assisted midline approach for identification of  
41 subarachnoid space in elective caesarean section: A randomised controlled trial. *Indian J*  
42 *Anaesth*. 2018 Apr;62(4):280-284.

43 [13].Arzola C, Mikhael R, Margarido C, Carvalho JC. Spinal ultrasound versus palpation for  
44 epidural catheter insertion in labour: A randomised controlled trial. *Eur J Anaesthesiol*. 2015  
45 Jul;32(7):499-505.

46 [14].Lim YC, Choo CY, Tan KT. A randomised controlled trial of ultrasound-assisted spinal  
47 anaesthesia. *Anaesth Intensive Care*. 2014 Mar;42(2):191-8.



- 1  
2  
3 [15].Chin A, Crooke B, Heywood L, Brijball R, Pelecanos AM, Abeypala W. A randomised  
4 controlled trial comparing needle movements during combined spinal-epidural anaesthesia with  
5 and without ultrasound assistance. *Anaesthesia*. 2018 Apr;73(4):466-473.
- 6 [16].Tao B, Liu K, Ding M, Xue H, Li X, Zhao P. Ultrasound increases the success rate of spinal  
7 needle placement through the epidural needle during combined spinal-epidural anaesthesia: A  
8 randomised controlled study. *Eur J Anaesthesiol*. 2021 Mar 1;38(3):251-258.
- 9 [17].Khan MA, Gupta M, Sharma S, Kasaudhan S. A comparative study of ultrasound assisted  
10 versus landmark technique for combined spinal-epidural anaesthesia in patients undergoing  
11 lower limb orthopaedic surgery. *Indian J Anaesth*. 2022 Apr;66(4):272-277.
- 12 [18].Li M, Ni X, Xu Z, Shen F, Song Y, Li Q, Liu Z. Ultrasound-Assisted Technology Versus the  
13 Conventional Landmark Location Method in Spinal Anesthesia for Cesarean Delivery in Obese  
14 Parturients: A Randomized Controlled Trial. *Anesth Analg*. 2019 Jul;129(1):155-161.
- 15 [19].Park SK, Yoo S, Kim WH, Lim YJ, Bahk JH, Kim JT. Ultrasound-assisted vs. landmark-guided  
16 paramedian spinal anaesthesia in the elderly: A randomised controlled trial. *Eur J Anaesthesiol*.  
17 2019 Oct;36(10):763-771.
- 18 [20].Tawfik MM, Atallah MM, Elkhaboutly WS, Allakkany NS, Abdelkhalik M. Does  
19 Preprocedural Ultrasound Increase the First-Pass Success Rate of Epidural Catheterization Before  
20 Cesarean Delivery? A Randomized Controlled Trial. *Anesth Analg*. 2017 Mar;124(3):851-856.
- 21 [21].Park SK, Bae J, Yoo S, Kim WH, Lim YJ, Bahk JH, Kim JT. Ultrasound-Assisted Versus  
22 Landmark-Guided Spinal Anesthesia in Patients With Abnormal Spinal Anatomy: A Randomized  
23 Controlled Trial. *Anesth Analg*. 2020 Mar;130(3):787-795.
- 24 [22].Qu B, Chen L, Zhang Y, Jiang M, Wu C, Ma W, Li Y. Correction to: Landmark-guided versus  
25 modified ultrasound-assisted Paramedian techniques in combined spinal-epidural anesthesia for  
26 elderly patients with hip fractures: a randomized controlled trial. *BMC Anesthesiol*. 2020 Oct  
27 23;20(1):268.
- 28 [23].Ni X, Li MZ, Zhou SQ, Xu ZD, Zhang YQ, Yu YB, Su J, Zhang LM, Liu ZQ. Accuro  
29 ultrasound-based system with computer-aided image interpretation compared to traditional  
30 palpation technique for neuraxial anesthesia placement in obese parturients undergoing  
31 cesarean delivery: a randomized controlled trial. *J Anesth*. 2021 Aug;35(4):475-482.
- 32 [24].Chong SE, Mohd Nikman A, Saedah A, Wan Mohd Nazaruddin WH, Kueh YC, Lim JA, Shamsul  
33 Kamalrujan H. Real-time ultrasound-guided paramedian spinal anaesthesia: evaluation of the  
34 efficacy and the success rate of single needle pass. *Br J Anaesth*. 2017 May 1;118(5):799-801.
- 35 [25].Mital T, Kamal M, Kumar M, Kumar R, Bhatia P, Singariya G. Comparison of landmark and  
36 real-time ultrasound-guided epidural catheter placement in the pediatric population: a  
37 prospective randomized comparative trial. *Anesth Pain Med (Seoul)*. 2021 Oct;16(4):368-376.
- 38 [26].Pakpirom J, Thatsanapornsathit K, Kovitwanawong N, Petsakul S, Benjhawaleemas P,  
39 Narunart K, Boonchuduang S, Karmakar MK. Real-time ultrasound-guided versus anatomic  
40 landmark-based thoracic epidural placement: a prospective, randomized, superiority trial. *BMC  
41 Anesthesiol*. 2022 Jun 25;22(1):198.
- 42 [27].Jindi Jiang, Yujie Xu, Mingfeng He. Real-time ultrasound-guided vs. anatomical  
43 landmark-guided paramedian epidural anesthesia in overweight parturients undergoing  
44 analgesic labor: a randomized controlled trial. *Signa Vitae*. 2021. 17(6);66-73.
- 45 [28].Elsharkawy H, Maheshwari A, Babazade R, Perlas A, Zaky S, Mounir-Soliman L. Real-time  
46 ultrasound-guided spinal anesthesia in patients with predicted difficult anatomy. *Minerva*  
47  
48  
49  
50  
51  
52  
53  
54  
55  
56  
57  
58  
59  
60



1  
2  
3 Anesthesiol. 2017 May;83(5):465-473.

4 [29].Yasser Mohamed Mohamed Osman.Comparing between ultrasound-assisted epidural  
5 catheter placement using Accuro and the use of ultrasound real time with acoustic  
6 puncture-assisted device to confirm epidural space end point, Egyptian Journal of  
7 Anaesthesia.2020,36:1, 140-146  
8

9  
10 [30].Bhardwaj D, Thakur L, Sharma S, Rana S, Gupta B, Sharma C. Comparative evaluation of  
11 three techniques for paramedian subarachnoid block: Point-of-care preprocedural ultrasound  
12 assisted, real-time ultrasound guided and landmark based. Indian J Anaesth. 2022 Mar;66(Suppl  
13 2):S102-S107.  
14

15 [31]. Nassar M, Abdelazim IA. Pre-puncture ultrasound guided epidural insertion before vaginal  
16 delivery. J Clin Monit Comput 2015;29:573-7.

17 [32]. Rasoulia A, Lohser J, Najafi M, Rafii- Tari H, Tran D, Kamani AA, et al. Utility of prepuncture  
18 ultrasound for localization of the thoracic epidural space. Can J Anaesth 2011;58:815-23.

19 [33]. Hurdle MF. Ultrasound-Guided Spinal Procedures for Pain: A Review. Phys Med Rehabil Clin  
20 N Am 2016;27:673-86.  
21

22 [34].Grau T, Leipold RW, Conradi R, Martin E, Motsch J. Efficacy of ultrasound imaging in  
23 obstetric epidural anesthesia. J Clin Anesth 2002; 14: 169-75.

24 [35].Grau T, Leipold RW, Conradi R, Martin E, Motsch J. Ultrasound imaging facilitates localization  
25 of the epidural space during combined spinal and epidural anesthesia. Reg Anesth Pain Med  
26 2001; 26: 64-7.  
27

28 [36].National Institute of Health and Clinical Excellence. Ultrasound Guided Regional Nerve Block  
29 (IPG285).January 2013.  
30

31 [37].Chin KJ, Ramlogan R, Arzola C, Singh M, Chan V. The utility of ultrasound imaging in  
32 predicting ease of performance of spinal anaesthesia in an orthopedic patient population. Reg  
33 Anesth Pain Med 2013;38:34-8.  
34

35 [38]. Vogt M, van Gerwen DJ, Lubbers W, et al. Optimal point of insertion and needle angle in  
36 neuraxial blockade using a midline approach: a study in computed tomography scans of adult  
37 patients. Reg Anesth Pain Med 2017; 42:600 – 608.  
38

39 [39].Kim H, Won D, Chang JE, et al. Ultrasound assessment of the anatomic landmarks for spinal  
40 anesthesia in elderly patients with hip fracture: a prospective observational study. Medicine  
41 (Baltimore). 2019;98:e16388.  
42

43 [40].Karmakar MK, Li X, Ho AM, Kwok WH, Chui PT. Real-time ultrasound-guided paramedian  
44 epidural access:evaluation of a novel in-plane technique. Br J Anaesth.2009;102:845 – 854.

45 [41].Conroy PH, Luyet C, McCartney CJ, McHardy PG. Real-time ultrasound-guided spinal  
46 anaesthesia: a prospective observational study of a new approach. Anesthesiol Res Pract.  
47 2013;2013:525818.  
48

49 [42].Liu Y, Qian W, Ke XJ, Mei W. Real-time ultrasound-guided spinal anesthesia using a new  
50 paramedian transverse approach. Curr Med Sci. 2018;38:910 – 913.  
51

52 [43].Shaikh F, Brzezinski J, Alexander S, Arzola C, Jose CA, Carvalho JCA, et al. Ultrasound imaging  
53 for lumbar punctures and epidural catheterisations: systematic review and meta-analysis. BMJ  
54 2013;346:f1720.  
55

56 [44].Celleno D, Gollo E, Uskok M. Analgesia anestesia terapia intensiva in ostetricia. Torino:  
57 Edizioni Minerva Medica; 2006.  
58

59 [45].Tran D, Kamani AA, Al-Attas E, et al. Single-operator real-time ultrasound-guidance to aim  
60

1  
2  
3 and insert lumbar epidural needle. *Canad J Anesth* 2010;57(4):313 – 21.

4 [46].Park SK, Cheun H, Kim YW, Bae J, Yoo S, Kim WH, Lim YJ, Kim JT. Ultrasound-assisted spinal  
5 anesthesia: A randomized comparison between midline and paramedian approaches. *J Clin*  
6 *Anesth*. 2022 Sep;80:110823.

7  
8 [47].Perna P, Gioia A, Ragazzi R, Volta CA, Innamorato M. Can pre-procedure neuroaxial  
9 ultrasound improve the identification of the potential epidural space when compared with  
10 anatomical landmarks? A prospective randomized study. *Minerva Anesthesiol*. 2017  
11 Jan;83(1):41-49.  
12  
13  
14  
15  
16  
17  
18  
19  
20  
21  
22  
23  
24  
25  
26  
27  
28  
29  
30  
31  
32  
33  
34  
35  
36  
37  
38  
39  
40  
41  
42  
43  
44  
45  
46  
47  
48  
49  
50  
51  
52  
53  
54  
55  
56  
57  
58  
59  
60

For peer review only

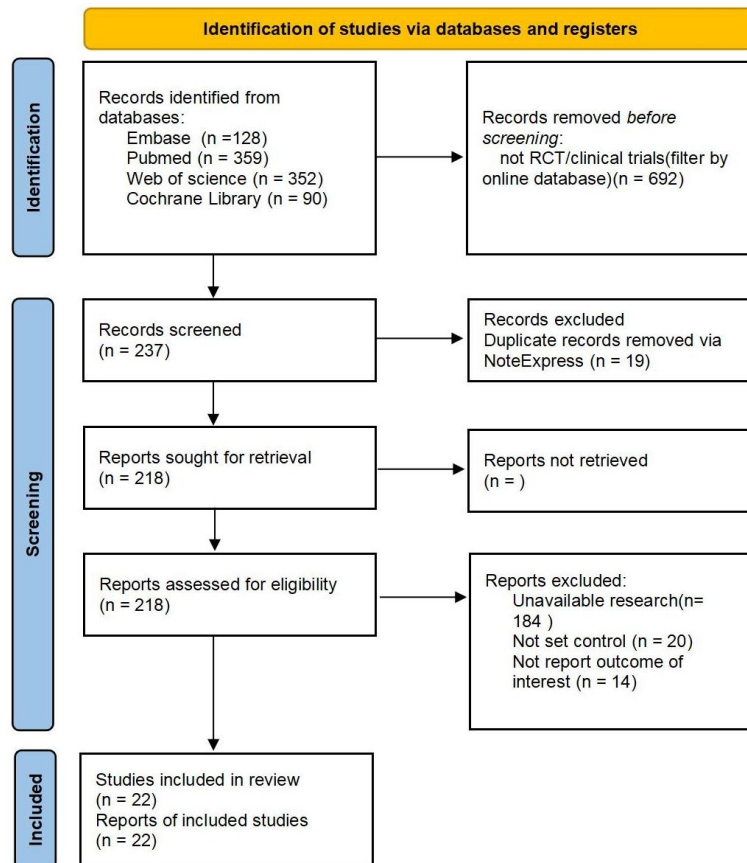

Fig.1.Flow diagram

239x229mm (144 x 144 DPI)

|                            | Random sequence generation (selection bias) | Allocation concealment (selection bias) | Blinding of participants and personnel (performance bias) | Blinding of outcome assessment (detection bias) | Incomplete outcome data (attrition bias) | Selective reporting (reporting bias) | Other bias |
|----------------------------|---------------------------------------------|-----------------------------------------|-----------------------------------------------------------|-------------------------------------------------|------------------------------------------|--------------------------------------|------------|
| A. Chin 2018               | +                                           | +                                       | ?                                                         | +                                               | ?                                        | +                                    | ?          |
| Bertam 2017                | ?                                           | ?                                       | ?                                                         | ?                                               | +                                        | +                                    | ?          |
| Bingdong Tao2021           | +                                           | +                                       | +                                                         | +                                               | ?                                        | +                                    | ?          |
| Bo Qu2020                  | +                                           | +                                       | ?                                                         | +                                               | +                                        | +                                    | ?          |
| Cristian Arzola 2015       | +                                           | ?                                       | +                                                         | ?                                               | +                                        | +                                    | ?          |
| Deepak Bhardwaj 2022       | +                                           | +                                       | +                                                         | ?                                               | +                                        | +                                    | ?          |
| Hesham2017                 | +                                           | +                                       | ?                                                         | +                                               | ?                                        | +                                    | ?          |
| Jatuporn Pakpirom2020      | +                                           | +                                       | +                                                         | +                                               | ?                                        | +                                    | ?          |
| Jindi Jiang2021            | +                                           | +                                       | +                                                         | +                                               | +                                        | +                                    | +          |
| Karthikeyan 2018           | +                                           | +                                       | ?                                                         | ?                                               | +                                        | +                                    | ?          |
| Luying Chen2021            | +                                           | ?                                       | ?                                                         | +                                               | +                                        | +                                    | ?          |
| Mengzhu Li2019             | +                                           | +                                       | +                                                         | +                                               | +                                        | +                                    | ?          |
| Mohamed Mohamed Tawfik2017 | +                                           | +                                       | +                                                         | +                                               | ?                                        | +                                    | ?          |
| Mohd Anas Khan2022         | +                                           | +                                       | +                                                         | +                                               | +                                        | +                                    | ?          |
| Parli Raghavan Ravi2021    | +                                           | ?                                       | ?                                                         | +                                               | +                                        | +                                    | ?          |
| Sangeeta Dhanger 2018      | +                                           | +                                       | ?                                                         | +                                               | +                                        | +                                    | ?          |
| Sun-Kyung Park2019         | +                                           | +                                       | ?                                                         | +                                               | +                                        | +                                    | ?          |
| Sun-Kyung Park2020         | +                                           | +                                       | ?                                                         | +                                               | +                                        | +                                    | ?          |
| Tanya Mital2021            | +                                           | +                                       | ?                                                         | +                                               | +                                        | +                                    | ?          |
| Xiu Ni 2021                | +                                           | +                                       | +                                                         | ?                                               | +                                        | +                                    | ?          |
| Y. C. Lim 2014             | +                                           | +                                       | ?                                                         | ?                                               | +                                        | +                                    | ?          |
| Yasser Mohamed 2020        | +                                           | ?                                       | ?                                                         | ?                                               | +                                        | +                                    | ?          |

Fig.2.Consensus risk-of-bias assessment of the included studies.

146x353mm (72 x 72 DPI)

**Search strategy**

Embase ( Performed on 31 September 2022 )

|    |                                                                                                                                                   |
|----|---------------------------------------------------------------------------------------------------------------------------------------------------|
| #1 | 'real time ultrasound guided' OR 'ultrasound assisted' OR 'landmark palpation' OR 'traditional positioning'                                       |
| #2 | 'spinal anesthesia'/exp OR 'spinal anesthesia' OR 'epidural anesthesia'/exp OR 'epidural anesthesia' OR 'combined spinal and epidural anesthesia' |
| #3 | #1 AND #2 AND [controlled clinical trial]/lim                                                                                                     |

PubMed ( Performed on 31 September 2022 )

|    |                                                                                                     |
|----|-----------------------------------------------------------------------------------------------------|
| #1 | real time ultrasound guided OR ultrasound assisted OR landmark palpation OR traditional positioning |
| #2 | spinal anesthesia OR epidural anesthesia OR combined spinal and epidural anesthesia                 |
| #3 | #1 AND #2 (Filters applied: Randomized Controlled Trial)                                            |

Web of science ( Performed on 31 September 2022 )

|    |                                                                                                          |
|----|----------------------------------------------------------------------------------------------------------|
| #1 | TS=(real time ultrasound guided OR ultrasound assisted OR landmark palpation OR traditional positioning) |
| #2 | TS=(spinal anesthesia OR epidural anesthesia OR combined spinal and epidural anesthesia)                 |
| #3 | #1 AND #2 and Clinical Trial                                                                             |

Cochrane Library ( Performed on 31 September 2022 )

|    |                                                                                                               |
|----|---------------------------------------------------------------------------------------------------------------|
| #1 | ("real time ultrasound guided" OR "ultrasound assisted" OR "landmark palpation" OR "traditional positioning") |
| #2 | ("spinal anesthesia" OR "epidural anesthesia" OR "combined spinal and epidural anesthesia")                   |
| #3 | #1 AND #2 in Trials(search limit)                                                                             |

**Inconsistency analysis, local inconsistency test, consistency analysis, ring inconsistency detection of each outcome index****First pass**

Inconsistency analysis

Chi2 (3) =1.82 Prob &gt; chi2 = 0.6113

local inconsistency test ( node-splitting method )

| Side | Direct Coef. | Std. Err. | Indierect Coef. | Std. Err. | Difference Coef. | Std. Err. | P>  z | tau   |
|------|--------------|-----------|-----------------|-----------|------------------|-----------|-------|-------|
| AB   | 0.488        | 0.162     | 0.596           | 0.45      | -0.108           | 0.481     | 0.822 | 0.511 |
| AC   | 0.526        | 0.262     | 0.719           | 0.375     | -0.194           | 0.455     | 0.671 | 0.518 |
| BC   | 0.099        | 0.287     | 0.074           | 0.340     | 0.026            | 0.466     | 0.954 | 0.517 |

consistency analysis

|     | Coef. | Std. Err. | z    | P>  z | [95% Conf. Interval] |
|-----|-------|-----------|------|-------|----------------------|
| A-B | 0.498 | 0.148     | 3.36 | 0.001 | 0.207,0.788          |
| A-C | 0.584 | 0.208     | 2.81 | 0.005 | 0.176,0.992          |

## ring inconsistency detection

| Loop  | IF    | self  | z_value | P_value | CI_95       | Loop_Heterog_tau2 |
|-------|-------|-------|---------|---------|-------------|-------------------|
| A-B-C | 0.083 | 0.667 | 0.125   | 0.901   | (0.00,1.39) | 0.228             |

**First attempt**

## Inconsistency analysis

Chi2 (3) =1.92 Prob > chi2 = 0.5887

## local inconsistency test (node-splitting method)

| Side | Direct Coef. | Std. Err. | Indierect Coef. | Std. Err. | Difference Coef. | Std. Err. | P>  z | tau   |
|------|--------------|-----------|-----------------|-----------|------------------|-----------|-------|-------|
| AB   | 0.412        | 0.134     | 0.449           | 0.345     | -0.037           | 0.371     | 0.920 | 0.365 |
| AC   | 0.369        | 0.166     | 0.592           | 0.320     | -0.223           | 0.359     | 0.534 | 0.364 |
| BC   | 0.037        | 0.237     | -0.034          | 0.234     | 0.071            | 0.333     | 0.830 | 0.367 |

## consistency analysis

|     | Coef. | Std. Err. | z    | P>  z | [95% Conf. Interval] |
|-----|-------|-----------|------|-------|----------------------|
| A-B | 0.415 | 0.120     | 3.44 | 0.001 | 0.179,0.651          |
| A-C | 0.413 | 0.144     | 2.87 | 0.004 | 0.131,0.695          |

## ring inconsistency detection

| Loop  | IF    | self  | z_value | P_value | CI_95       | Loop_Heterog_tau2 |
|-------|-------|-------|---------|---------|-------------|-------------------|
| A-B-C | 0.126 | 0.319 | 0.395   | 0.693   | (0.00,0.75) | 0.106             |

**Identify time**

## Inconsistency analysis

Chi2 (3) =6.42 Prob > chi2 = 0.0928

## local inconsistency test (node-splitting method)

| Side | Direct Coef. | Std. Err. | Indierect Coef. | Std. Err. | Difference Coef. | Std. Err. | P>  z | tau   |
|------|--------------|-----------|-----------------|-----------|------------------|-----------|-------|-------|
| AB   | 1.528        | 0.568     | 5.956           | 1.717     | -4.427           | 1.809     | 0.014 | 1.678 |
| AC   | 3.139        | 1.145     | 0.512           | 1.497     | 2.627            | 1.885     | 0.163 | 1.941 |
| BC   | -0.949       | 1.076     | 2.273           | 1.455     | -3.222           | 1.810     | 0.075 | 1.851 |

## consistency analysis

|     | Coef. | Std. Err. | z    | P>  z | [95% Conf. Interval] |
|-----|-------|-----------|------|-------|----------------------|
| A-B | 1.977 | 0.644     | 3.07 | 0.002 | 0.715,3.204          |
| A-C | 2.174 | 0.943     | 2.30 | 0.021 | 0.176,4.023          |

## ring inconsistency detection

| Loop  | IF    | seIF  | z_value | P_value | CI_95       | Loop_Heterog_tau2 |
|-------|-------|-------|---------|---------|-------------|-------------------|
| A-B-C | 2.378 | 1.745 | 1.363   | 0.173   | (0.00,5.80) | 2.322             |

**Time of procedure spinal**

## Inconsistency analysis

Chi2 (3) =7.30 Prob > chi2 = 0.0629

## local inconsistency test (node-splitting method)

| Side | Direct Coef. | Std. Err. | Indierect Coef. | Std. Err. | Difference Coef. | Std. Err. | P> z  | tau   |
|------|--------------|-----------|-----------------|-----------|------------------|-----------|-------|-------|
| AB   | -0.790       | 0.356     | 0.657           | 1.360     | -1.447           | 1.405     | 0.303 | 0.913 |
| AC   | 1.401        | 0.628     | -0.323          | 0.864     | 1.724            | 1.065     | 0.106 | 0.834 |
| BC   | 1.342        | 0.710     | 1.844           | 1.027     | -0.501           | 1.247     | 0.688 | 0.975 |

## consistency analysis

|     | Coef.  | Std. Err. | z     | P> z  | [95% Conf. Interval] |
|-----|--------|-----------|-------|-------|----------------------|
| A-B | -0.697 | 0.348     | -2.01 | 0.045 | -1.378,-0.016        |
| A-C | 0.806  | 0.557     | 1.45  | 0.148 | -0.286,1.899         |

## ring inconsistency detection

| Loop  | IF    | seIF  | z_value | P_value | CI_95       | Loop_Heterog_tau2 |
|-------|-------|-------|---------|---------|-------------|-------------------|
| A-B-C | 0.890 | 1.119 | 0.796   | 0.426   | (0.00,3.08) | 0.932             |

**subgroup analysis****Obesity/Maternity****First pass**

## Inconsistency analysis

Chi2 (3) =0.29 Prob > chi2 = 0.5896

## local inconsistency test (node-splitting method)

| Side | Direct Coef. | Std. Err. | Indierect Coef. | Std. Err. | Difference Coef. | Std. Err. | P> z  | tau   |
|------|--------------|-----------|-----------------|-----------|------------------|-----------|-------|-------|
| AB   | 0.454        | 0.195     | 0.076           | 0.665     | 0.378            | 0.698     | 0.588 | 0.435 |
| AC   | 0.636        | 0.541     | 1.012           | 0.441     | -0.376           | 0.698     | 0.590 | 0.435 |
| BC   | 0.559        | 0.389     | 0.182           | 0.575     | 0.377            | 0.698     | 0.589 | 0.435 |

## consistency analysis

|     | Coef. | Std. Err. | z    | P> z  | [95% Conf. Interval] |
|-----|-------|-----------|------|-------|----------------------|
| A-B | 0.419 | 0.165     | 2.54 | 0.011 | 0.096,0.743          |
| A-C | 0.845 | 0.310     | 2.73 | 0.006 | 0.238,1.452          |

## ring inconsistency detection

| Loop  | IF    | self  | z_value | P_value | CI_95       | Loop_Heterog_tau2 |
|-------|-------|-------|---------|---------|-------------|-------------------|
| A-B-C | 0.257 | 0.732 | 0.351   | 0.726   | (0.00,1.69) | 0.094             |

**First attempt**

## Inconsistency analysis

Chi2 (3) =1.47 Prob > chi2 = 0.2260

## local inconsistency test (node-splitting method)

| Side | Direct Coef. | Std. Err. | Indierect Coef. | Std. Err. | Difference Coef. | Std. Err. | P> z  | tau   |
|------|--------------|-----------|-----------------|-----------|------------------|-----------|-------|-------|
| AB   | 0.545        | 0.325     | -0.529          | 0.825     | 1.074            | 0.887     | 0.226 | 0.539 |
| AC   | 0.251        | 0.555     | 1.325           | 0.692     | -1.074           | 0.887     | 0.226 | 0.539 |
| BC   | 0.780        | 0.610     | -0.294          | 0.643     | 1.074            | 0.887     | 0.226 | 0.539 |

## consistency analysis

|     | Coef. | Std. Err. | z    | P> z  | [95% Conf. Interval] |
|-----|-------|-----------|------|-------|----------------------|
| A-B | 0.403 | 0.322     | 1.25 | 0.210 | -0.227,1.033         |
| A-C | 0.678 | 0.462     | 1.47 | 0.142 | -0.227,1.583         |

## ring inconsistency detection

| Loop  | IF    | self  | z_value | P_value | CI_95       | Loop_Heterog_tau2 |
|-------|-------|-------|---------|---------|-------------|-------------------|
| A-B-C | 1.072 | 0.890 | 1.204   | 0.228   | (0.00,2.82) | 0.272             |

**Elderly/Abnormal Spinal Anatomy****First attempt**

## Inconsistency analysis

Chi2 (3) =0.33 Prob > chi2 = 0.5674

## local inconsistency test (node-splitting method)

| Side | Direct Coef. | Std. Err. | Indierect Coef. | Std. Err. | Difference Coef. | Std. Err. | P> z  | tau   |
|------|--------------|-----------|-----------------|-----------|------------------|-----------|-------|-------|
| AB   | 0.663        | 0.114     | 0.536           | 0.191     | 0.128            | 0.223     | 0.567 | 0.000 |
| AC   | 0.108        | 0.129     | 0.236           | 0.182     | -0.127           | 0.223     | 0.567 | 0.000 |
| BC   | -0.427       | 0.141     | -0.555          | 0.172     | 0.127            | 0.223     | 0.567 | 0.000 |

## consistency analysis

|     | Coef. | Std. Err. | z    | P> z  | [95% Conf. Interval] |
|-----|-------|-----------|------|-------|----------------------|
| A-B | 0.630 | 0.098     | 6.41 | 0.000 | 0.437,0.822          |
| A-C | 0.151 | 0.105     | 1.43 | 0.151 | -0.055,0.357         |

## ring inconsistency detection

| Loop  | IF    | self  | z_value | P_value | CI_95       | Loop_Heterog_tau2 |
|-------|-------|-------|---------|---------|-------------|-------------------|
| A-B-C | 1.072 | 0.890 | 1.204   | 0.228   | (0.00,2.82) | 0.272             |



|       |       |       |       |       |             |       |
|-------|-------|-------|-------|-------|-------------|-------|
| A-B-C | 0.127 | 0.223 | 0.572 | 0.567 | (0.00,0.56) | 0.000 |
|-------|-------|-------|-------|-------|-------------|-------|

A: Traditional positioning B:Ultrasound assistance C: Real-time guidance

Figure 1S

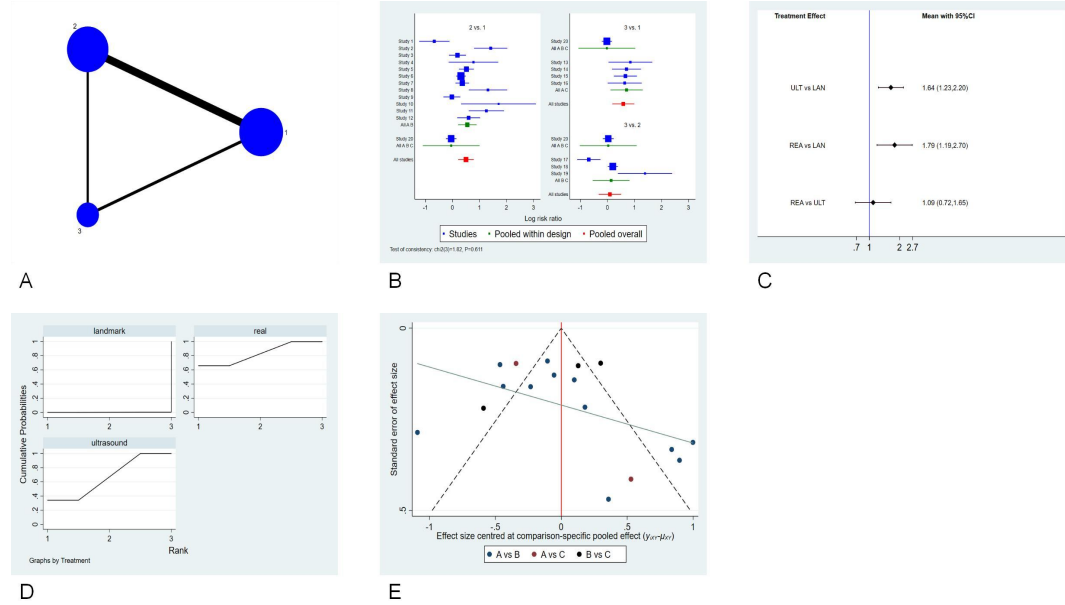

Figure 2S

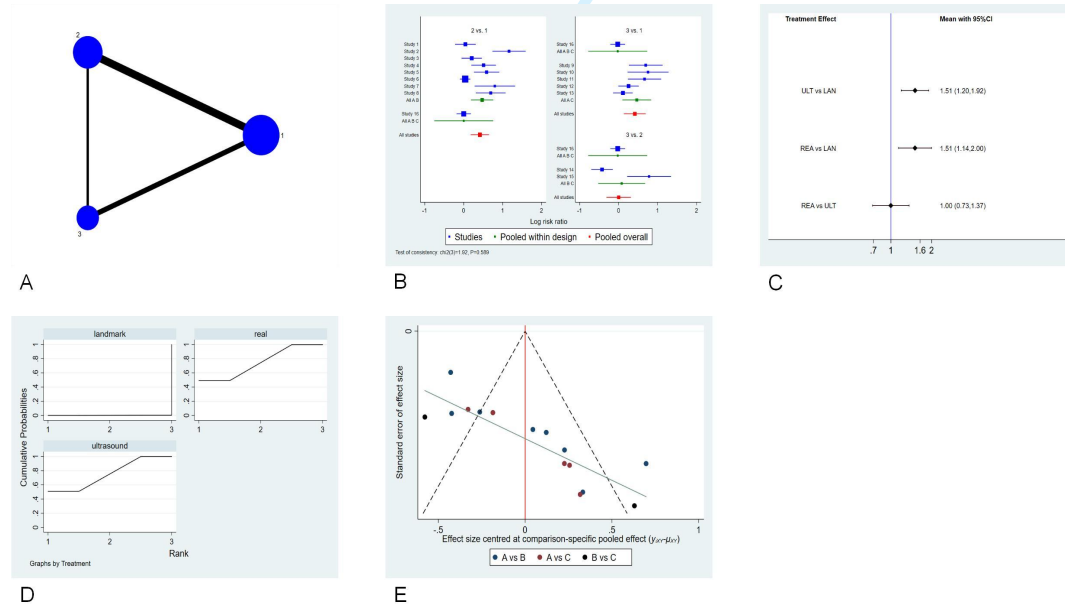

Figure 3S

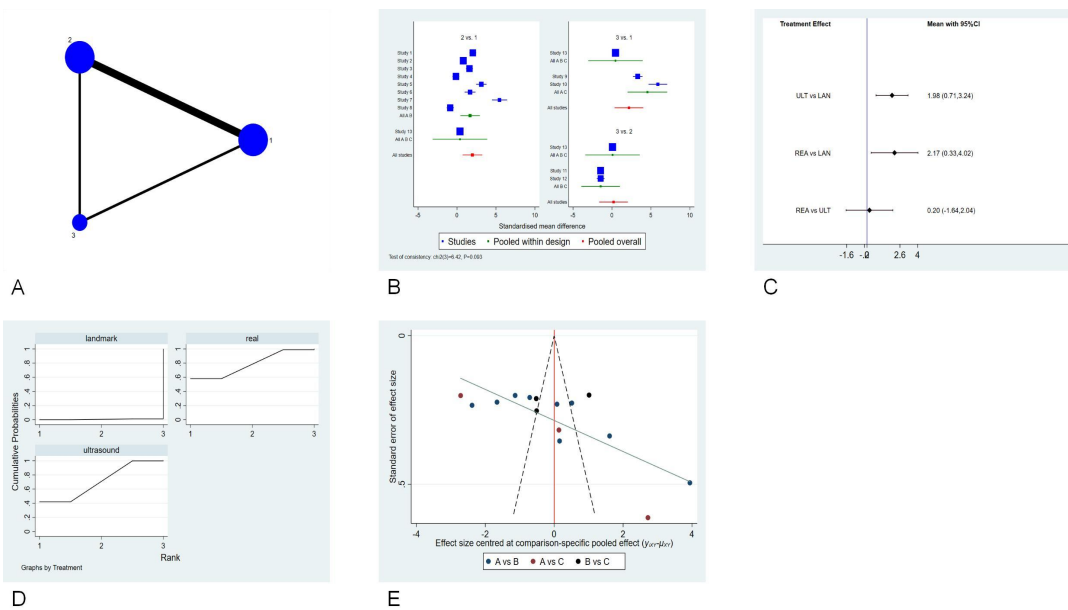

Figure 4S

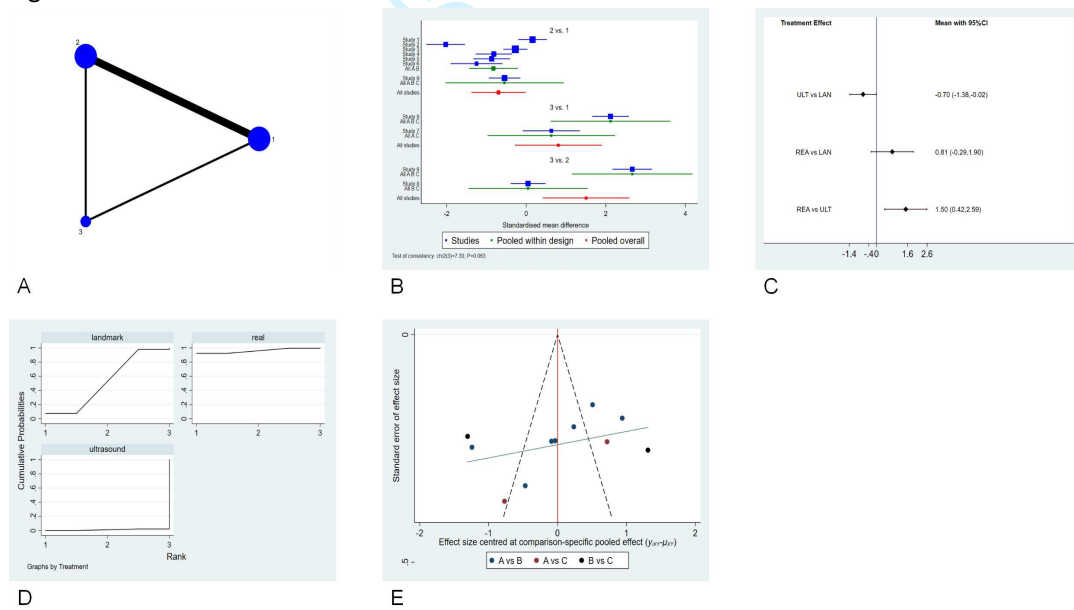

Figure 5S

1  
2  
3  
4  
5  
6  
7  
8  
9  
10  
11  
12  
13  
14  
15  
16  
17  
18  
19  
20  
21  
22  
23  
24  
25  
26  
27  
28  
29  
30  
31  
32  
33  
34  
35  
36  
37  
38  
39  
40  
41  
42  
43  
44  
45  
46  
47  
48  
49  
50  
51  
52  
53  
54  
55  
56  
57  
58  
59  
60

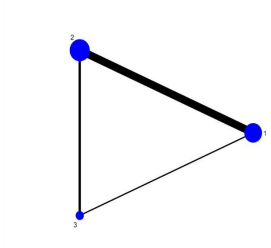

A

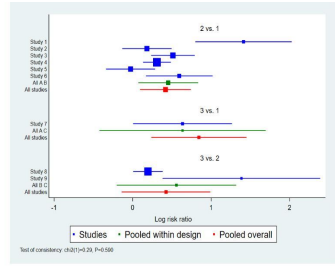

B

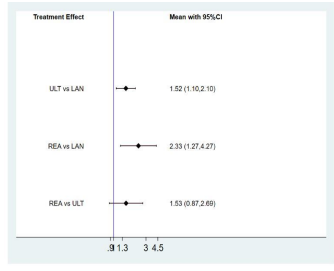

C

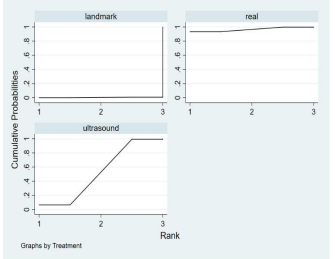

D

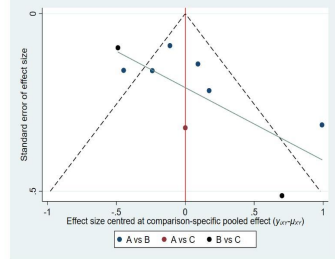

E

Figure 6S

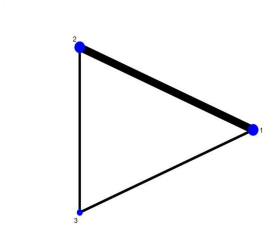

A

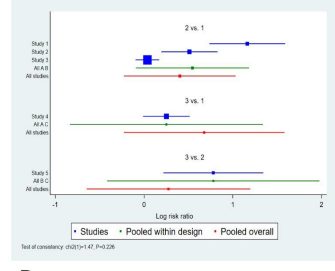

B

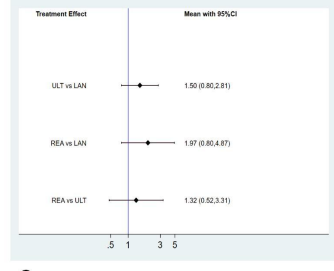

C

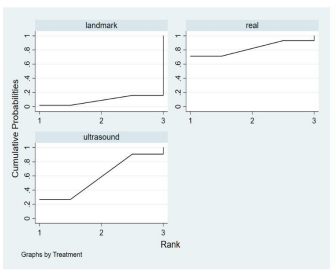

D

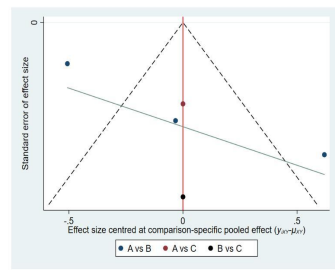

E

Figure 7S

1  
2  
3  
4  
5  
6  
7  
8  
9  
10  
11  
12  
13  
14  
15  
16  
17  
18  
19  
20  
21  
22  
23  
24  
25  
26  
27  
28  
29  
30  
31  
32  
33  
34  
35  
36  
37  
38  
39  
40  
41  
42  
43  
44  
45  
46  
47  
48  
49  
50  
51  
52  
53  
54  
55  
56  
57  
58  
59  
60

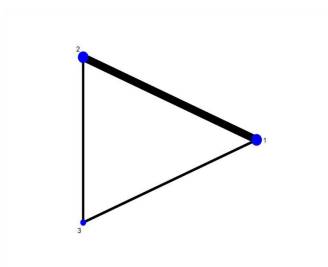

A

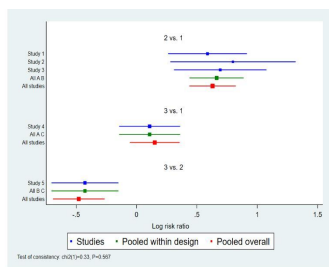

B

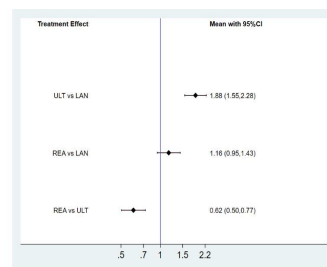

C

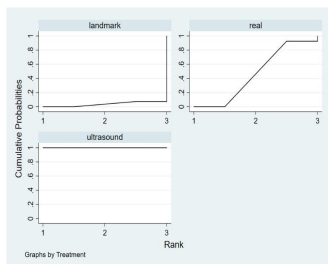

D

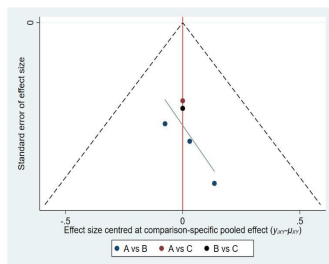

E

peer review only

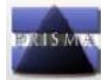

## PRISMA 2020 Checklist

| Section and Topic             | Item # | Checklist item                                                                                                                                                                                                                                                                                       | Location where item is reported |
|-------------------------------|--------|------------------------------------------------------------------------------------------------------------------------------------------------------------------------------------------------------------------------------------------------------------------------------------------------------|---------------------------------|
| <b>TITLE</b>                  |        |                                                                                                                                                                                                                                                                                                      |                                 |
| Title                         | 1      | Identify the report as a systematic review.                                                                                                                                                                                                                                                          | Page1                           |
| <b>ABSTRACT</b>               |        |                                                                                                                                                                                                                                                                                                      |                                 |
| Abstract                      | 2      | See the PRISMA 2020 for Abstracts checklist.                                                                                                                                                                                                                                                         | Page1                           |
| <b>INTRODUCTION</b>           |        |                                                                                                                                                                                                                                                                                                      |                                 |
| Rationale                     | 3      | Describe the rationale for the review in the context of existing knowledge.                                                                                                                                                                                                                          | Page1                           |
| Objectives                    | 4      | Provide an explicit statement of the objective(s) or question(s) the review addresses.                                                                                                                                                                                                               | Page1                           |
| <b>METHODS</b>                |        |                                                                                                                                                                                                                                                                                                      |                                 |
| Eligibility criteria          | 5      | Specify the inclusion and exclusion criteria for the review and how studies were grouped for the syntheses.                                                                                                                                                                                          | Page2                           |
| Information sources           | 6      | Specify all databases, registers, websites, organisations, reference lists and other sources searched or consulted to identify studies. Specify the date when each source was last searched or consulted.                                                                                            | Page2                           |
| Search strategy               | 7      | Present the full search strategies for all databases, registers and websites, including any filters and limits used.                                                                                                                                                                                 | Page3                           |
| Selection process             | 8      | Specify the methods used to decide whether a study met the inclusion criteria of the review, including how many reviewers screened each record and each report retrieved, whether they worked independently, and if applicable, details of automation tools used in the process.                     | Page3                           |
| Data collection process       | 9      | Specify the methods used to collect data from reports, including how many reviewers collected data from each report, whether they worked independently, any processes for obtaining or confirming data from study investigators, and if applicable, details of automation tools used in the process. | Page3                           |
| Data items                    | 10a    | List and define all outcomes for which data were sought. Specify whether all results that were compatible with each outcome domain in each study were sought (e.g. for all measures, time points, analyses), and if not, the methods used to decide which results to collect.                        | Page3                           |
|                               | 10b    | List and define all other variables for which data were sought (e.g. participant and intervention characteristics, funding sources). Describe any assumptions made about any missing or unclear information.                                                                                         | Page3                           |
| Study risk of bias assessment | 11     | Specify the methods used to assess risk of bias in the included studies, including details of the tool(s) used, how many reviewers assessed each study and whether they worked independently, and if applicable, details of automation tools used in the process.                                    | Page3                           |
| Effect measures               | 12     | Specify for each outcome the effect measure(s) (e.g. risk ratio, mean difference) used in the synthesis or presentation of results.                                                                                                                                                                  | Page3                           |
| Synthesis methods             | 13a    | Describe the processes used to decide which studies were eligible for each synthesis (e.g. tabulating the study intervention characteristics and comparing against the planned groups for each synthesis (item #5)).                                                                                 | Page4                           |
|                               | 13b    | Describe any methods required to prepare the data for presentation or synthesis, such as handling of missing summary statistics, or data conversions.                                                                                                                                                | Page3                           |
|                               | 13c    | Describe any methods used to tabulate or visually display results of individual studies and syntheses.                                                                                                                                                                                               |                                 |
|                               | 13d    | Describe any methods used to synthesize results and provide a rationale for the choice(s). If meta-analysis was performed, describe the model(s), method(s) to identify the presence and extent of statistical heterogeneity, and software package(s) used.                                          | Page3                           |
|                               | 13e    | Describe any methods used to explore possible causes of heterogeneity among study results (e.g. subgroup analysis, meta-regression).                                                                                                                                                                 | Page3                           |
|                               | 13f    | Describe any sensitivity analyses conducted to assess robustness of the synthesized results.                                                                                                                                                                                                         |                                 |
| Reporting bias assessment     | 14     | Describe any methods used to assess risk of bias due to missing results in a synthesis (arising from reporting biases).                                                                                                                                                                              | Page7                           |
| Certainty assessment          | 15     | Describe any methods used to assess certainty (or confidence) in the body of evidence for an outcome.                                                                                                                                                                                                | Page4                           |



## PRISMA 2020 Checklist

| Section and Topic                              | Item # | Checklist item                                                                                                                                                                                                                                                                       | Location where item is reported |
|------------------------------------------------|--------|--------------------------------------------------------------------------------------------------------------------------------------------------------------------------------------------------------------------------------------------------------------------------------------|---------------------------------|
| <b>RESULTS</b>                                 |        |                                                                                                                                                                                                                                                                                      |                                 |
| Study selection                                | 16a    | Describe the results of the search and selection process, from the number of records identified in the search to the number of studies included in the review, ideally using a flow diagram.                                                                                         | Fig 1                           |
|                                                | 16b    | Cite studies that might appear to meet the inclusion criteria, but which were excluded, and explain why they were excluded.                                                                                                                                                          |                                 |
| Study characteristics                          | 17     | Cite each included study and present its characteristics.                                                                                                                                                                                                                            | Table1、 2                       |
| Risk of bias in studies                        | 18     | Present assessments of risk of bias for each included study.                                                                                                                                                                                                                         | Fig 2                           |
| Results of individual studies                  | 19     | For all outcomes, present, for each study: (a) summary statistics for each group (where appropriate) and (b) an effect estimate and its precision (e.g. confidence/credible interval), ideally using structured tables or plots.                                                     | supplemental material           |
| Results of syntheses                           | 20a    | For each synthesis, briefly summarise the characteristics and risk of bias among contributing studies.                                                                                                                                                                               | supplemental material           |
|                                                | 20b    | Present results of all statistical syntheses conducted. If meta-analysis was done, present for each the summary estimate and its precision (e.g. confidence/credible interval) and measures of statistical heterogeneity. If comparing groups, describe the direction of the effect. | supplemental material           |
|                                                | 20c    | Present results of all investigations of possible causes of heterogeneity among study results.                                                                                                                                                                                       |                                 |
|                                                | 20d    | Present results of all sensitivity analyses conducted to assess the robustness of the synthesized results.                                                                                                                                                                           | supplemental material           |
| Reporting biases                               | 21     | Present assessments of risk of bias due to missing results (arising from reporting biases) for each synthesis assessed.                                                                                                                                                              | supplemental material           |
| Certainty of evidence                          | 22     | Present assessments of certainty (or confidence) in the body of evidence for each outcome assessed.                                                                                                                                                                                  | supplemental material           |
| <b>DISCUSSION</b>                              |        |                                                                                                                                                                                                                                                                                      |                                 |
| Discussion                                     | 23a    | Provide a general interpretation of the results in the context of other evidence.                                                                                                                                                                                                    | Page9                           |
|                                                | 23b    | Discuss any limitations of the evidence included in the review.                                                                                                                                                                                                                      | Page10                          |
|                                                | 23c    | Discuss any limitations of the review processes used.                                                                                                                                                                                                                                | Page10                          |
|                                                | 23d    | Discuss implications of the results for practice, policy, and future research.                                                                                                                                                                                                       | Page10                          |
| <b>OTHER INFORMATION</b>                       |        |                                                                                                                                                                                                                                                                                      |                                 |
| Registration and protocol                      | 24a    | Provide registration information for the review, including register name and registration number, or state that the review was not registered.                                                                                                                                       | Page11                          |
|                                                | 24b    | Indicate where the review protocol can be accessed, or state that a protocol was not prepared.                                                                                                                                                                                       |                                 |
|                                                | 24c    | Describe and explain any amendments to information provided at registration or in the protocol.                                                                                                                                                                                      |                                 |
| Support                                        | 25     | Describe sources of financial or non-financial support for the review, and the role of the funders or sponsors in the review.                                                                                                                                                        | Page11                          |
| Competing interests                            | 26     | Declare any competing interests of review authors.                                                                                                                                                                                                                                   | Page11                          |
| Availability of data, code and other materials | 27     | Report which of the following are publicly available and where they can be found: template data collection forms; data extracted from included studies; data used for all analyses; analytic code; any other materials used in the review.                                           | supplemental material           |

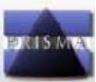

# PRISMA 2020 Checklist

- 1
- 2
- 3
- 4
- 5
- 6
- 7
- 8
- 9
- 10
- 11
- 12
- 13
- 14
- 15
- 16
- 17
- 18
- 19
- 20
- 21
- 22
- 23
- 24
- 25
- 26
- 27
- 28
- 29
- 30
- 31
- 32
- 33
- 34
- 35
- 36
- 37
- 38
- 39
- 40
- 41
- 42
- 43
- 44
- 45
- 46
- 47

From: Page MJ, McKenzie JE, Bossuyt PM, Boutron I, Hoffmann TC, Mulrow CD, et al. The PRISMA 2020 statement: an updated guideline for reporting systematic reviews. *BMJ* 2021;372:n71. doi: 10.1136/bmj.n71

For more information, visit: <http://www.prisma-statement.org/>

For peer review only

# BMJ Open

## Comparison of ultrasound-guided and traditional localization in intraspinal anesthesia: a systematic review and network meta-analysis

|                                 |                                                                                                                                                                                                                                                                                                                                                                                                                                                                                                                                                                                                                                                                                                                                                    |
|---------------------------------|----------------------------------------------------------------------------------------------------------------------------------------------------------------------------------------------------------------------------------------------------------------------------------------------------------------------------------------------------------------------------------------------------------------------------------------------------------------------------------------------------------------------------------------------------------------------------------------------------------------------------------------------------------------------------------------------------------------------------------------------------|
| Journal:                        | <i>BMJ Open</i>                                                                                                                                                                                                                                                                                                                                                                                                                                                                                                                                                                                                                                                                                                                                    |
| Manuscript ID                   | bmjopen-2022-071253.R2                                                                                                                                                                                                                                                                                                                                                                                                                                                                                                                                                                                                                                                                                                                             |
| Article Type:                   | Original research                                                                                                                                                                                                                                                                                                                                                                                                                                                                                                                                                                                                                                                                                                                                  |
| Date Submitted by the Author:   | 09-Oct-2023                                                                                                                                                                                                                                                                                                                                                                                                                                                                                                                                                                                                                                                                                                                                        |
| Complete List of Authors:       | Zhang, Yinzhou; Guangzhou University of Traditional Chinese Medicine First Affiliated Hospital<br>Peng, Mingling; Guangzhou University of Traditional Chinese Medicine First Affiliated Hospital<br>Wei, Junying; Guangzhou University of Traditional Chinese Medicine First Affiliated Hospital<br>Huang, Jieling; Guangzhou University of Traditional Chinese Medicine First Affiliated Hospital<br>Ma, WuHua; Guangzhou University of Traditional Chinese Medicine First Affiliated Hospital, The First Affiliated Hospital of Guangzhou University of Chinese Medicine<br>Li, Yuhui; Guangzhou University of Traditional Chinese Medicine First Affiliated Hospital, The First Affiliated Hospital of Guangzhou University of Chinese Medicine |
| <b>Primary Subject Heading</b>: | Anaesthesia                                                                                                                                                                                                                                                                                                                                                                                                                                                                                                                                                                                                                                                                                                                                        |
| Secondary Subject Heading:      | Anaesthesia                                                                                                                                                                                                                                                                                                                                                                                                                                                                                                                                                                                                                                                                                                                                        |
| Keywords:                       | Ultrasonography, Adult anaesthesia < ANAESTHETICS, Adult surgery < SURGERY                                                                                                                                                                                                                                                                                                                                                                                                                                                                                                                                                                                                                                                                         |
|                                 |                                                                                                                                                                                                                                                                                                                                                                                                                                                                                                                                                                                                                                                                                                                                                    |

SCHOLARONE™  
Manuscripts





I, the Submitting Author has the right to grant and does grant on behalf of all authors of the Work (as defined in the below author licence), an exclusive licence and/or a non-exclusive licence for contributions from authors who are: i) UK Crown employees; ii) where BMJ has agreed a CC-BY licence shall apply, and/or iii) in accordance with the terms applicable for US Federal Government officers or employees acting as part of their official duties; on a worldwide, perpetual, irrevocable, royalty-free basis to BMJ Publishing Group Ltd ("BMJ") its licensees and where the relevant Journal is co-owned by BMJ to the co-owners of the Journal, to publish the Work in this journal and any other BMJ products and to exploit all rights, as set out in our [licence](#).

The Submitting Author accepts and understands that any supply made under these terms is made by BMJ to the Submitting Author unless you are acting as an employee on behalf of your employer or a postgraduate student of an affiliated institution which is paying any applicable article publishing charge ("APC") for Open Access articles. Where the Submitting Author wishes to make the Work available on an Open Access basis (and intends to pay the relevant APC), the terms of reuse of such Open Access shall be governed by a Creative Commons licence – details of these licences and which [Creative Commons](#) licence will apply to this Work are set out in our licence referred to above.

Other than as permitted in any relevant BMJ Author's Self Archiving Policies, I confirm this Work has not been accepted for publication elsewhere, is not being considered for publication elsewhere and does not duplicate material already published. I confirm all authors consent to publication of this Work and authorise the granting of this licence.

Comparison of ultrasound-guided and traditional localization in intraspinal anesthesia: a systematic review and network meta-analysis

Yin-Zhou Zhang 1†, Ming-Ling Peng 1†, Jun-ying Wei 1, Jie-ling Huang 1, Wu-Hua Ma 1, Yu-Hui Li 1\*

1. Department of Anesthesiology, The First Affiliated Hospital of Guangzhou

University of Chinese Medicine. † : Co-first author, \* : Corresponding Author

Corresponding author: Yuhui Li; E-mail: liliuyuhui@126.com

### Abstract

**Objectives:** The optimal puncture technique for neuraxial anesthesia in different populations is unclear. We sought to obtain data from randomized controlled trials comparing the impact of ultrasound-guided technology and traditional positioning technology on the success rate of neuraxial anesthesia.

**Design:** Systematic review and network meta-analysis using study populations, interventions, intervention comparisons, outcome measures and study types.

**Data sources:** PubMed, Embase, Cochrane Library and Web of science were searched until September 31, 2022.

**Eligibility Criteria:** We included randomized controlled trials comparing three types of neuraxial anesthesia: ultrasound-assisted, ultrasound real-time guidance, and conventional positioning to describe which neuraxial anesthesia modality is best for patients and to recommend the appropriate one for different populations.

**Data extraction and synthesis:** Five independent reviewers retrieved, screened, and edited included studies using standardized methods. Assess risk of bias using the Cochrane Collaboration and Evidence Project tools. Network meta-analysis was performed using STATA 15 statistical software.

**Results:** Twenty-two studies containing three different interventions were included. The SUCRA values of first-pass success rates for the three neuraxial anesthesia methods were real-time guidance (82.8%), ultrasound-assisted (67.1%), and traditional positioning (0.1%). Both ultrasound techniques improved first-pass success rates compared with traditional localization, but there was no significant difference between the two. Subgroup analysis showed that the use of real-time ultrasound guidance for neuraxial anesthesia in pregnant and obese patients improved first-pass success rates. Ultrasound-assisted technology can improve first-attempt success rates in older patients with abnormal lumbar spine anatomy.

**Conclusion:** Compared with conventional positioning, ultrasound guidance technology can improve the first-pass success rate of neuraxial anesthesia, but there is no significant difference between ultrasound-assisted and real-time guidance technology. The results of subgroup analysis tell us that the most suitable neuraxial anesthesia method is different for different groups of people.

PROSPERO number: CRD42022376041

### Strengths and limitations of this study:

1. To the best of our knowledge, this is the first study to compare the puncture success rates of three neuraxial anesthesia methods using a frequentist approach.
2. This protocol was created strictly based on the published PRISMA guidelines, and its research

1  
2  
3 results have certain reference value for clinical anesthesiologists.

4 3. Due to the technical difficulty of real-time ultrasound guidance and the lack of evidence from  
5 clinically relevant studies, this may be one of the main limitations of this meta-analysis.  
6

## 7 1. Introduction

8 As a commonly used method of anesthesia, neuraxial anesthesia has traditionally been  
9 performed by manually palpating body markers to determine the puncture site. In recent years,  
10 ultrasound technology has been increasingly used in neuraxial anesthesia [1]. There are currently  
11 two types of ultrasound technologies used for neuraxial anesthesia: ultrasound-assisted  
12 technology and ultrasound real-time guidance technology. Preoperative ultrasound scanning  
13 helps identify puncture points and estimate puncture depth, while ultrasound real-time guidance  
14 technology (puncture under ultrasound visualization) allows for more accurate observation of  
15 the needle's location and trajectory. Some existing studies have compared ultrasound-assisted  
16 technology with traditional localization methods, and some have compared ultrasound real-time  
17 guidance technology with traditional localization methods. However, few studies have compared  
18 these two ultrasound techniques. Chen's study pointed out that ultrasound-assisted neuraxial  
19 anesthesia has a higher first-pass success rate and higher patient satisfaction than real-time  
20 guidance technology in hip surgery in elderly patients [2], while Parli pointed out that in the  
21 proposed operation in obese patients undergoing lower limb surgery, the use of real-time  
22 ultrasound guidance for neuraxial anesthesia shortens the operation time and has a higher  
23 first-pass success rate [3]. There is controversy as to which of these three methods of neuraxial  
24 anesthesia is the most effective. Therefore, we reviewed articles comparing traditional  
25 positioning, ultrasound-assisted, and real-time guidance techniques used in neuraxial anesthesia.  
26 A systematic review of three methods of neuraxial anesthesia was conducted through network  
27 meta-analysis.  
28

## 29 2. Materials and Methods

30 We followed the recommendations of the Preferred Reporting Items for Systematic Reviews  
31 and Meta-Analyses (PRISMA) [4] and registered the meta-analysis and systematic review in the  
32 PROSPERO database and PROSPERO network on November 28, 2022 (registration number:  
33 CRD42022376041). The current network meta-analysis (NMA) is based on the protocol  
34 recommended by the Cochrane Collaboration [5] and follows the Preferred Reporting Items for  
35 Systematic Reviews and Meta-Analyses guidelines [6].

### 36 2.1. Search strategy

37 We searched the PubMed, Embase, Web of Science, and Cochrane Library databases for all  
38 relevant articles up to September 31, 2022. Keywords: “ultrasound real-time guidance” ,  
39 “ultrasound-assisted” , “landmark palpation” , “traditional positioning” , “epidural  
40 anesthesia” , “spinal anesthesia” and “combined spinal and epidural anesthesia” .  
41 Searches were conducted using a combination of subject headings and free words. The complete  
42 search strategy can be found in the supplement.  
43

### 44 2.2. Inclusion and exclusion criteria

45 We included randomized controlled trials (RCTs) comparing two or three methods of  
46 neuraxial anesthesia. The information is as follows: Study population: neuraxial anesthesia,  
47 including epidural anesthesia, spinal anesthesia, and combined spinal and epidural anesthesia;  
48 intervention: traditional positioning, ultrasound-assisted positioning, and ultrasound real-time  
49 guidance; intervention comparison: a neuraxial anesthesia method ; Outcome measures: The  
50  
51  
52  
53  
54  
55  
56  
57  
58  
59  
60

1  
2  
3 primary outcome was first-pass success rate (defined as the needle successfully achieving  
4 epidural puncture in one attempt without reorientation); the secondary outcome was  
5 first-attempt success rate (defined as the needle reaching the epidural space in one insertion  
6 attempt and allows for needle reorientation), recognition time (the time from operator contact  
7 with the patient's skin to marking the puncture site on the skin and the time from placing the  
8 probe on the skin to marking the puncture site), and puncture time (from skin contact with  
9 needle to cerebrospinal fluid time interval between outflows); study design: randomized  
10 controlled trial.  
11  
12

13 Exclusion criteria were as follows: review articles, case reports, case series, letters to the  
14 editor, reviews, conference proceedings, laboratory science studies and any other irrelevant  
15 studies, as well as studies that did not report the results of interest.  
16  
17

### 18 2.3. Study selection

19 Two authors, Yinzhou Zhang and Junying Wei, respectively searched the database according  
20 to the above search strategy. The type of randomized controlled trial or clinical trial was selected  
21 through filters in online databases. The retrieved documents were saved and deduplicated  
22 through document management software (NoteExpress). The titles and abstracts of the selected  
23 literature were read one by one, and if the title and abstract met the criteria, the full text was  
24 evaluated to see if the results of interest were reported. Yinzhou Zhang, Junying Wei, and Jieling  
25 Huang also discussed whether each study should be included or excluded to reach consensus.  
26 Disagreements regarding inclusion or exclusion were resolved in discussions with Yuhui Li and  
27 Wuhua Ma.  
28  
29

### 30 2.4. Data extraction

31 All relevant data from the included studies were independently extracted and entered into  
32 standardized forms by Yinzhou Zhang and Junying Wei, and then cross-checked. The  
33 standardized form included the following items: title, author name, publication date, patient  
34 type, surgery type, body mass index, age, anesthesia method, sample size, first pass success rate,  
35 first attempt success rate, identification time, procedure time, intervention method, and the best  
36 way to intervene. Age and body mass index data were extracted as mean  $\pm$  standard deviation  
37 and median (interquartile range). When data from included studies were presented in the form  
38 of interquartile ranges, we followed appropriate methods for transformation [7 - 9] and finally  
39 used mean  $\pm$  standard deviation for statistical analysis.  
40  
41

### 42 2.5. Study quality

43 Jieling Huang and Wuhua Ma conducted independent assessments using the risk of bias tool  
44 in Review Manager (version 5.3). Quality was assessed using the following possible sources of  
45 bias: random sequence generation, allocation concealment, blinding of participants and  
46 personnel, blinding of outcome assessments, incomplete outcome data, and selective reporting.  
47 The methods of each study were rated as “high”, “low” or “unclear”, reflecting the  
48 risk of bias [5].  
49  
50

### 51 2.6. Statistical analysis

52 Multiple treatment comparison is a meta-analytic summary method that includes direct and  
53 indirect comparisons of treatments. We used STATA 15 software to download the network  
54 package for statistical analysis. The effect value of dichotomous variables used RR values, and  
55 the effect value of continuous variables used SMD. When the p value was  $>0.05$ , the  
56 inconsistency model was used to test consistency, and the node splitting method was used for  
57  
58  
59  
60

local inconsistency analysis. Perform a ring inconsistency test on the network diagram that forms a closed loop. If the 95% CI does not include 0, the heterogeneity is large, and sensitivity and subgroup analysis are required.

A network diagram was formed connecting all included studies to indicate the type of neuraxial anesthesia, the number of patients in the different studies, and the number of pairwise comparisons. Nodes show different neuraxial anesthesia methods, and lines show direct comparisons between neuraxial anesthesia methods. Cumulative probability plots for each neuraxial anesthesia method and pairwise comparisons for each intervention were plotted. We used cumulative ranking area under the curve (SUCRA) values to present the effect of neuraxial anesthesia methods on first-pass success rate and first-attempt success rate. SUCRA is a relative ranking metric with a statistical range from 0 to 100% that indicates the likelihood that the therapy will be rated the best [10]. Higher SUCRA values are considered better outcomes for individual interventions.

## 2.7. Patient and Public Involvement

No patients participated in the study

## 3. Results

PubMed and EMBASE databases were searched, and 128 and 359 studies were initially assessed. In addition, we searched the Web of science and Cochrane Library databases and retrieved 352 and 90 studies respectively, yielding a total of 929 publications. Online database filters were used to screen for randomized controlled trials or clinical trials and 692 studies were excluded. After removing duplicates using literature management software, 218 studies remained. Titles, abstracts, and full texts of the remaining studies were reviewed in detail; 184 studies were not available, 20 studies were excluded due to lack of controls, and 14 studies did not report the outcome of interest (Fig. 1 ).

### 3.1. Research characteristics

Tables 1 and 2 summarize the characteristics of the 22 studies. All experiments were two- or three-arm. Among them, 13 studies compared ultrasound-assisted localization with conventional localization [11-23], 5 studies compared ultrasound-assisted localization with conventional localization [24-28], and 3 studies compared ultrasound-assisted localization with real-time guidance in the spinal anesthesia [2,19,3]. One study compared the use of three methods in spinal anesthesia [20]. Table 1 lists the first author and publication year of the literature, as well as basic information such as patient type, surgical method, patient age and body mass index. Table 2 lists the anesthesia method, study sample size, intervention measures, and main outcome indicators (first time passing success rates) and better intervention outcomes. In all included studies, the probes used for ultrasound were portable low-frequency convex array probes, excluding special puncture probes.

Table 1

| The author  | Time of Publication | Type of patient | Type of surgery      | Age (&, #, *)           | BMI (&, #, *)          |
|-------------|---------------------|-----------------|----------------------|-------------------------|------------------------|
| Karthikeyan | 2018                | adult           | knee and hip surgery | 65.3±9.7#<br>68.2±10.3& | 30.1±6.4#<br>30.6±4.7& |
| Sangeeta    | 2018                | maternal        | cesarean section     | 23.06±3.01#             | 27.2±3.8#              |

|                              |      |                                            |                                |                                                                        |                                                                  |
|------------------------------|------|--------------------------------------------|--------------------------------|------------------------------------------------------------------------|------------------------------------------------------------------|
| Dhanger                      |      |                                            |                                | 24.03±3.43&                                                            | 27.2±4.2&                                                        |
| Cristian<br>Arzola           | 2015 | maternal                                   | childbirth                     | 32.3±5.8#<br>32.7±4.7&                                                 | 29±5.1#<br>29.3±6&                                               |
| Y. C. Lim                    | 2014 | adult                                      | lower limb surgery             | 61.1±13.3#<br>63.7±12.6&                                               | 25.4±5.6#<br>25.0±5.9                                            |
| Chin                         | 2018 | maternal                                   | cesarean section               | NM                                                                     | 30.2 <sup>a</sup> (27.0-36.5)#<br>30.5 <sup>a</sup> (26.9-34.2)& |
| Bingdong<br>Tao              | 2021 | maternal                                   | cesarean section               | 32.3±5.2#<br>30.6±3.8&                                                 | 28.3±3.0#<br>28.3±2.2&                                           |
| Mohd Anas<br>Khan            | 2022 | orthopedic<br>patient                      | lower limb surgery             | 54.5±12.8#<br>57.7±13.2&                                               | 29.3±4.6#<br>27.7±3.8&                                           |
| Mengzhu Li                   | 2019 | obese patients                             | cesarean section               | 29.5±3.9#<br>30.1±4.5&                                                 | NM                                                               |
| Sun-Kyung<br>Park            | 2019 | old age patient                            | lower limb surgery             | 71.1±7.2#<br>71.2±6.1&                                                 | 25.8±3.1#<br>25.8±3.1&                                           |
| Mohamed<br>Mohamed<br>Tawfik | 2017 | maternal                                   | cesarean section               | 27.7±4#<br>26.7±3.8&                                                   | 29.2±3#<br>29.2±2.9&                                             |
| Sun-Kyung<br>Park            | 2020 | anatomic<br>abnormality of<br>lumbar spine | lower limb surgery             | 70.5±8.8#<br>66.5±13.2&                                                | 26.1±3.2#<br>25.9±2.9&                                           |
| Bo Qu                        | 2020 | old age patient                            | hip surgery                    | 83.3±6.7#<br>82.3±7.1&                                                 | 21.6±3.6#<br>20.6±3.0&                                           |
| Xiu Ni                       | 2021 | obese patients                             | cesarean section               | 31.8±4.8#<br>31.4±4.2&                                                 | 33.5±2.1#<br>33.0±2.1&                                           |
| Bertam                       | 2017 | adult                                      | lower limb surgery             | NM                                                                     | NM                                                               |
| Tanya<br>Mital               | 2021 | children                                   | chest and abdominal<br>surgery | 2.4±1.3*<br>3.0±1.7&                                                   | NM                                                               |
| Jatuporn<br>Pakpirom         | 2020 | adult                                      | chest and abdominal<br>surgery | 60.0 <sup>a</sup> (51.0-67.0)<br>*<br>58.5 <sup>a</sup> (53.75-70.25)& | 23.4±4.0*<br>22.8±3.5&                                           |
| Jindi<br>Jiang               | 2021 | overweight<br>mothers                      | childbirth                     | 29.2±3.1*<br>28.4±3.4&                                                 | 35.6±2.0*<br>35.2±2.4&                                           |
| Hesham                       | 2017 | anatomic<br>abnormality of<br>lumbar spine | knee and hip surgery           | 69±10*<br>70±10&                                                       | 34±11*<br>33±8&                                                  |
| Luying<br>Chen               | 2021 | old age patient                            | hip surgery                    | 82.7±6.6*<br>84.5±6.2#                                                 | 21.9±3.1*<br>21.3±3.4#                                           |
| Yasser<br>Mohamed            | 2020 | maternal                                   | childbirth                     | 25.4±5.1*<br>26.8±5.65#                                                | 37.9±4.3*<br>38.1±4.2#                                           |
| Parli                        | 2021 | obese patients                             | lower limb surgery             | 58.5 <sup>a</sup> (50.3, 65.8)                                         | 34.9 <sup>a</sup> (33.1, 3                                       |

|                                                                                       |      |       |                    |                                             |                                               |
|---------------------------------------------------------------------------------------|------|-------|--------------------|---------------------------------------------|-----------------------------------------------|
| Raghavan Ravi                                                                         |      |       |                    | *<br>59.5 <sup>a</sup> (52.3, 65.8)<br>#    | 6.35)*<br>34.9 <sup>a</sup> (33.1,<br>36.40)# |
| Deepak Bhardwaj                                                                       | 2022 | adult | lower limb surgery | 39.66±13.27&<br>42.88±12.72#<br>43.6±15.24* | 22.8±2.8&<br>22.4±3.4#<br>23.9±3.0*           |
| <sup>a</sup> :median(interquartile range) NM: no mention                              |      |       |                    |                                             |                                               |
| &:landmark group #: ultrasound assisted group *:real time group                       |      |       |                    |                                             |                                               |
| E:Epidural anesthesia S:Spinal anesthesia CSE:Combined spinal and epidural anesthesia |      |       |                    |                                             |                                               |

Table 2

| The author       | Time of Publication | Method of anesthesia (E, S, CSE) | Sample size(&,#,*) | intervention                    | first pass success rate(%) | Effect Estimate(better) |
|------------------|---------------------|----------------------------------|--------------------|---------------------------------|----------------------------|-------------------------|
| Karthik eyan     | 2018                | S                                | 59#<br>60&         | Landmark vs ultrasound assisted | 43#<br>22&                 | ND                      |
| Sangeeta Dhanger | 2018                | S                                | 50#<br>50&         | Landmark vs ultrasound assisted | 18#<br>74&                 | ultrasound assisted     |
| Cristina Arzola  | 2015                | E                                | 60#<br>68&         | Landmark vs ultrasound assisted | 50#<br>60&                 | ND                      |
| Y. C. Lim        | 2014                | S                                | 85#<br>85&         | Landmark vs ultrasound assisted | 7#<br>15&                  | ND                      |
| Chin             | 2018                | CSE                              | 105#<br>110&       | Landmark vs ultrasound assisted | 38.2#<br>63.8&             | ultrasound assisted     |
| Bingdong Tao     | 2021                | CSE                              | 64#<br>64&         | Landmark vs ultrasound assisted | 68.8#<br>93.8&             | ultrasound assisted     |
| Mohd Anas Khan   | 2022                | CSE                              | 50#<br>50&         | Landmark vs ultrasound assisted | 60#<br>86&                 | ultrasound assisted     |
| Mengzhu Li       | 2019                | CSE                              | 40#<br>40&         | Landmark vs ultrasound assisted | 52.5#<br>87.5&             | ultrasound assisted     |
| Sun-Kyung Park   | 2019                | S                                | 40#<br>40&         | Landmark vs ultrasound assisted | 17.5#<br>65.0&             | ultrasound assisted     |
| Mohamed          | 2017                | CSE                              | 53#                | Landmark vs                     | 60#                        | ND                      |



|                                                                                       |      |     |                   |                                                       |                   |                        |
|---------------------------------------------------------------------------------------|------|-----|-------------------|-------------------------------------------------------|-------------------|------------------------|
| Mohamed Tawfik                                                                        |      |     | 55&               | ultrasound assisted                                   | 58.5&             |                        |
| Sun-Kyung Park                                                                        | 2020 | S   | 22#<br>22&        | Landmark vs<br>ultrasound<br>assisted                 | 9.1#<br>50&       | ultrasound<br>assisted |
| Bo Qu                                                                                 | 2020 | CSE | 40#<br>40&        | Landmark vs<br>ultrasound<br>assisted                 | 20#<br>70&        | ultrasound<br>assisted |
| Xiu Ni                                                                                | 2021 | CSE | 40#<br>40&        | Landmark vs<br>ultrasound<br>assisted                 | 40#<br>72.5&      | ultrasound<br>assisted |
| Bertam                                                                                | 2017 | S   | 30*<br>30&        | Landmark vs<br>real time                              | 47*<br>30&        | real time              |
| Tanya Mital                                                                           | 2021 | E   | 23*<br>22&        | Landmark vs<br>real time                              | 82.6*<br>40.9&    | real time              |
| Jatuporn Pakpirom                                                                     | 2020 | E   | 48*<br>48&        | Landmark vs<br>real time                              | 68.6*<br>35.4&    | real time              |
| Jindi Jiang                                                                           | 2021 | E   | 30*<br>30&        | Landmark vs<br>real time                              | 56.7*<br>30&      | real time              |
| Hesham                                                                                | 2017 | S   | 14*<br>18&        | Landmark vs<br>real time                              | 72.2*<br>83.3&    | ND                     |
| Luying Chen                                                                           | 2021 | S   | 57*<br>57#        | ultrasound<br>assisted vs<br>real time                | 31.6*<br>63.2#    | ultrasound<br>assisted |
| Yasser Mohamed                                                                        | 2020 | E   | 50*<br>50#        | ultrasound<br>assisted vs<br>real time                | 90*<br>74#        | real time              |
| Parli Raghavan Ravi                                                                   | 2021 | S   | 40*<br>40#        | ultrasound<br>assisted vs<br>real time                | 40*<br>10#        | real time              |
| Deepak Bhardwaj                                                                       | 2022 | S   | 50&<br>50#<br>50* | Landmark vs<br>ultrasound<br>assisted vs<br>real time | 82&<br>78#<br>80* | ND                     |
| ND:no difference                                                                      |      |     |                   |                                                       |                   |                        |
| &:landmark group #: ultrasound assisted group *:real time group                       |      |     |                   |                                                       |                   |                        |
| E:Epidural anesthesia S:Spinal anesthesia CSE:Combined spinal and epidural anesthesia |      |     |                   |                                                       |                   |                        |

### 3.2. Risk of bias assessment

The quality indicators of the included studies are shown in Figure 2 . All studies used random sequence generation, 12 of which had allocation concealment. Thirteen of the studies did not specify how participants were blinded. One study had a high risk of bias in blinding the



operator, which could be explained by the difficulty in achieving blinding of the procedure. Most studies had incomplete outcome data, but five of the studies had unspecified risks. None of the studies reported results selectively.

### 3.3. Synthesis of results

For all results for each outcome measure, we present network plots, forest plots for individual studies, forest plots for pairwise comparisons, and cumulative ranking curves. The results are shown in Figures 1S to 7S. Results of inconsistency model detection, consistency analysis, local inconsistency analysis, ring inconsistency detection and funnel plots can be found in the supplementary file. From model testing and funnel plots, the heterogeneity of the study was minimal.

### 3.4. First pass success rate

Nineteen two-arm studies and one three-arm study documented first-pass success rates and were pooled for analysis [2,3,11-17,19-27,29,30]. Across all studies, traditional positioning was the most frequently cited (Figure 1SA). In this study, the puncture success rate of the ultrasound-assisted group and real-time guidance group seemed to be higher than that of the traditional positioning group (Fig. 1SB). However, there was no significant difference between the ultrasound-assisted group and the real-time guidance group (Fig. 1SC). The probabilities of conventional positioning, assisted positioning, and real-time guidance were analyzed by plotting a cumulative ranking graph (Fig. 1SD). According to SUCRA data, the first puncture success rate is highest for real-time guidance (82.8%), followed by ultrasound assistance (67.1%), and finally conventional positioning (0.1%). The funnel plot is shown in Figure 1SE.

### 3.5. First attempt rate

A total of 16 trials provided data on first-attempt success rates [2,3,11,12,14,18-22,24-28,30]. The network node diagram is shown in Figure 2SA. Forest plot results showed that the use of ultrasound was associated with first-attempt success rate (Figure 2SB). However, there was no significant difference between ultrasound-assisted and real-time guidance (Figure 2SC). The cumulative ranking chart shows that ultrasound-assisted first attempt success rate is the highest (75.3%), followed by real-time guidance (74.6%) and traditional positioning (0.1%) (Figure 2SD). The funnel plot is shown in Figure 2SE.

### 3.6. Identification time

The network diagrams and forest diagrams of each study are shown in Figure 3SA and Figure 3SB. The results [2,3,11-12,17-19,21-23,26-27,30] show that the traditional positioning method has the shortest positioning time (Figure 3SD), but the ultrasound-assisted and real-time guided puncture positioning time is not significant. differences (Fig. 3SC). The funnel plot is shown in Figure 3SE.

### 3.7. Duration of spinal anesthesia

A total of nine studies, eight two-arm studies and one three-arm study [3,11,12,14,18,19,21,28,30], were collected to compare the entire operation process from the puncture needle contacting the skin to the outflow of cerebrospinal fluid. The network diagrams and forest diagrams of each study are shown in Figure 4SA and Figure 4SB. Comprehensive analysis showed that the ultrasound-assisted operation time was the shortest (Figure 4SD), and there was no significant difference between the traditional positioning group and the real-time guidance group (Figure 4SC). The funnel plot is shown in Figure 4SE.

### 3.8. Subgroup analysis

1  
2  
3  
4  
5  
6  
7  
8  
9  
10  
11  
12  
13  
14  
15  
16  
17  
18  
19  
20  
21  
22  
23  
24  
25  
26  
27  
28  
29  
30  
31  
32  
33  
34  
35  
36  
37  
38  
39  
40  
41  
42  
43  
44  
45  
46  
47  
48  
49  
50  
51  
52  
53  
54  
55  
56  
57  
58  
59  
60

In the first subgroup, we included 9 studies in obese adults and pregnant women (obese or not). Analyze the results of first pass success rate [3,12,13,15,16,20,23,27,29] and first attempt success rate [3,12,18,20,27]. For first-pass success rate, a network plot (Figure 5SA), a forest plot for a single study (Figure 5SB), a forest plot for pairwise comparisons (Figure 5SC), a cumulative ranking curve (Figure 5SD), and a funnel plot (Figure 5SE) are shown. The network diagram of the first puncture success rate (Fig. 6SA), the forest diagram of a single study (Fig. 6SB), the forest diagram of pairwise comparison (Fig. 6SC), the cumulative ranking curve (Fig. 6SD) and the funnel plot (Fig. 6SE) are as shown in the figure.

In a second subgroup analysis, we included patients with a mean age over 70 years and those with abnormal lumbar anatomy (previous lumbar surgery or scoliosis) [2,19,21,22,28]. The network diagram and forest diagram are shown in Figure 7SA and Figure 7SB. The results of the meta-analysis showed that the first-attempt success rate seemed to be higher in the ultrasound-assisted group (Figure 7SC), and the cumulative ranking chart also showed that ultrasound-assisted was the most recommended (Figure 7SD). The funnel plot is shown in Figure 7SE.

#### 4. Discussion

In recent years, there has been increasing interest in ultrasound guidance for spinal, epidural, or combined spinal-epidural anesthesia [31-33]. Research supports the use of this technique to increase puncture success rates and reduce complications [34-35]. The UK National Institute for Health and Clinical Excellence (NICE) has published guidance [36] recommending that ultrasound can be used both as a preoperative assessment tool and as a live puncture.

Two major indicators of difficulty in neuraxial anesthesia are the number of needle turns required for successful puncture and the time required for the entire procedure. Multiple needle sticks are an independent predictor of complications such as dural penetration, vascular injury, and paresthesias [37]. Ideal neuraxial anesthesia requires a successful puncture [24]. Minimizing the number of attempts can help reduce the risk of complications and improve patient satisfaction [38]. Previous studies have shown that ultrasound scanning before puncture can improve the success rate of puncture and reduce the number of punctures [39]. The characteristic of real-time guidance technology is to observe the needle trajectory in real time during the puncture process, which improves the puncture success rate [24,40-42]. This is consistent with our analysis.

But the analysis showed no significant difference in first-pass and first-attempt success rates between ultrasound-assisted and real-time guidance. However, subgroup analysis showed that real-time guidance technology was more beneficial for pregnant women and obese people. Ultrasound-assisted technology is more recommended for older patients and patients with abnormal spinal anatomy.

Let us analyze the reasons for this difference. It is difficult for pregnant and obese patients to achieve the ideal puncture position during neuraxial anesthesia, and difficulty in palpation may lead to an increase in the number of punctures, resulting in patient discomfort or puncture failure [43]. During pregnancy, lumbar protrusion increases and the pelvis expands and rotates, resulting in a deeper and narrower epidural space and a narrower “safe zone” between the ligamentum flavum and the dura mater [44]. These individuals are generally younger, have soft lumbar ligaments, clear muscle-fat boundaries, and the anterior and posterior complexes are clearly visible under ultrasound, which can significantly reduce the number of needle

1  
2  
3 adjustments and are suitable for real-time guidance technology. [34,45]. However, real-time  
4 puncture is difficult for elderly patients. In elderly patients, due to vertebral body and ligament  
5 hyperplasia and intervertebral space narrowing, ordinary ultrasound probes are more likely to  
6 block the puncture needle path, thus affecting the observation of the puncture needle trajectory.  
7 The advantage of ultrasound-assisted positioning is that it can shorten the anesthesia operation  
8 time. Studies have shown that real-time guidance technology is not superior to  
9 ultrasound-assisted localization because real-time guidance requires longer operation time,  
10 especially in elderly patients, which reduces satisfaction scores [2].

11  
12  
13 Of course, we cannot ignore other factors that influence our results. The puncture paths  
14 used by the researchers were not entirely consistent. According to previous studies [46], the  
15 paramedian puncture route is better than the median position because it avoids the supraspinal  
16 and interspinous ligaments, and ligament calcification will make puncture more difficult for the  
17 operator and increase the number of attempts. The experience of the operator cannot be  
18 ignored either. Operators included in the literature were almost all anesthesiologists skilled in  
19 the use of ultrasound techniques for neuraxial anesthesia. The anesthetist's qualifications are  
20 also a factor that affects the success rate of puncture, and its effect may affect the success rate  
21 of puncture, exaggerating the advantages of ultrasound-guided technology [47]. In addition,  
22 real-time ultrasound guidance technology is difficult, requiring the operator to hold the probe  
23 and ensure image stability while observing the needle trajectory. This is also a challenge for  
24 anesthesiologists with many years of experience in ultrasound-assisted localization. This  
25 technical difference also affects our results. On the other hand, the choice of ultrasound probe  
26 will also affect real-time guidance of puncture. Due to the common low-frequency convex array  
27 probe, the contact surface of the probe does not completely fit the skin, and the curved shell of  
28 the probe blocks the angle of the needle during puncture. Recently, TranD [45] used a new  
29 puncture probe. An epidural needle holder is provided on the side of the probe to adjust the  
30 needle angle in the plane of the probe. According to the pre-positioned intervertebral space and  
31 the pre-set needle insertion angle, the operator only needs to pay attention to the needle  
32 insertion depth to complete the puncture. This method keeps the needle in the same plane as  
33 the probe so that the needle trajectory is always visible.

34  
35  
36 This study also has some limitations. Due to the difficulty of real-time guidance technology,  
37 there are fewer studies in this field and the sample size is smaller than assisted positioning,  
38 which will also affect our analysis. Therefore, our results cannot be extrapolated to other related  
39 studies.

#### 40 41 42 5. Conclusion

43  
44  
45 This study demonstrates that ultrasound guidance technology has significant advantages in  
46 improving the first-pass success rate of neuraxial anesthesia. Furthermore, subgroup analysis  
47 showed that real-time ultrasound guidance had a significant advantage in first-pass success rate.  
48 Ultrasound real-time guidance technology is more suitable for pregnant and obese patients, and  
49 ultrasound-assisted technology is more suitable for elderly patients with abnormal lumbar spine  
50 anatomy. Current research evidence is insufficient, mainly because study designs vary, real-time  
51 guidance techniques are difficult, and there are currently few studies. Future research should  
52 focus on ultrasound real-time guidance technology and expand the application of visualization  
53 technology in neuraxial anesthesia.

54  
55  
56 Acknowledgements : The authors would like to thank the teachers of the Department of  
57  
58  
59  
60

1  
2  
3 Anesthesiology, the First Affiliated Hospital of Guangzhou University of Chinese Medicine for  
4 their help.

5  
6 Contributors:Yinzhou Zhang and Mingling Peng are co-first authors of this manuscript.Yinzhou  
7 Zhang, Jieling Huang, Junying Wei, Wuhua Ma and Yuhui Li were involved in the design and  
8 conception of the research scheme.Yinzhou Zhang and Junying Wei will screen the title, abstract  
9 and full text.If disagreement arises on inclusion or exclusion, it will be resolved through  
10 discussion with other authors (Jieling Huang,Wuhua Ma and/or Yuhui Li).Yinzhou Zhang and  
11 Junying Wei will extract data from the article independently, and third party reviewers (Jieling  
12 Huang and/or Wuhua Ma) will check the integrity and correctness of the extracted data in the  
13 results evaluation.All authors drafted and revised this research protocol and approved it for  
14 publication.

15  
16 Funding:This work was fully supported by the Department of Anesthesiology, the First Affiliated  
17 Hospital of Guangzhou University of Chinese Medicine.

18  
19 Competing interests: None declared.

20  
21 Data availability statement: No additional data available.

22  
23 Provenance and peer review : Not commissioned; externally peer reviewed.

24  
25 Ethics and dissemination: There were no human participants in this study and there is no ethics  
26 statement.

27  
28 PROSPERO registration number:CRD42022376041

29  
30 Figure explanation

31  
32 Fig.1.Flow diagram

33  
34 Fig.2.Consensus risk-of-bias assessment of the included studies.

35  
36 Green = low risk; yellow = unclear; red =high risk.

37  
38 Fig.1S: Results of first pass success rate

39  
40 A:Network plots(The width of the lines is proportional to the number of trials comparing every  
41 pair of treatments, and the size of every node is proportional to the number of randomized  
42 participants. 1: Traditional positioning,2:Ultrasound assistance, 3: Real-time guidance)

43  
44 B:Forest plot for all included studies(1: Traditional positioning,2:Ultrasound assistance, 3:  
45 Real-time guidance)

46  
47 C:Two-comparison forest diagram for all included studies(LAN:Traditional  
48 positioning,ULT:Ultrasound assistance, REA: Real-time guidance)

49  
50 D:Cumulative ranking curve of all included studies(landmark:Traditional  
51 positioning,ultrasound:Ultrasound assistance, real: Real-time guidance)

52  
53 E:funnel plots(A:Traditional positioning,B:Ultrasound assistance, C: Real-time guidance)

54  
55 Fig.2S: Results of first attempt rate

56  
57 Fig.3S: Results of identify time

58  
59 Fig.4S: Results of procedure time of spinal anesthesia

60  
61 Fig.5S: Results of subgroup 1 first pass rate

62  
63 Fig.6S: Results of subgroup 1 first attempt rate

64  
65 Fig.7S: Results of subgroup 2 first attempt rate

66  
67 Reference:

68  
69 [1].Tran D, Kamani AA, Lessoway VA, Peterson C, Hor KW, Rohling RN.Preinsertion paramedian  
70

- 1  
2  
3 ultrasound guidance for epidural anesthesia. *Anesth Analg* 2009; 109: 661 – 7
- 4 [2].Chen L, Huang J, Zhang Y, Qu B, Wu X, Ma W, Li Y. Real-Time Ultrasound-Guided Versus  
5 Ultrasound-Assisted Spinal Anesthesia in Elderly Patients With Hip Fractures: A Randomized  
6 Controlled Trial. *Anesth Analg*. 2022 Feb 1;134(2):400-409.
- 7 [3].Ravi PR, Naik S, Joshi MC, Singh S. Real-time ultrasound-guided spinal anaesthesia vs pre-  
8 procedural ultrasound-guided spinal anaesthesia in obese patients. *Indian J Anaesth*. 2021  
9 May;65(5):356-361.
- 10 [4].Salanti G. Indirect and mixed-treatment comparison, network, or multiple-treatments  
11 meta-analysis: many names, many benefits, many concerns for the next generation evidence  
12 synthesis tool. *Res Synth Methods* 2012;3:80–97.
- 13 [5].Higgins JPT, Green S. Cochrane Collaboration. Cochrane handbook for systematic reviews of  
14 interventions. Chichester, England; Hoboken, NJ: Wiley-Blackwell; 2008.
- 15 [6].Hutton B, Salanti G, Caldwell DM, Chaimani A, Schmid CH, Cameron C, et al. The PRISMA  
16 extension statement for reporting of systematic reviews incorporating network meta-analyses of  
17 health care interventions: checklist and explanations. *Ann Intern Med* 2015;162:777 – 84.
- 18 [7].J. Shi, D. Luo, H. Weng, X. Zeng, L. Lin, H. Chu and T. Tong\* (2020), "Optimally estimating the  
19 sample standard deviation from the five-number summary", *Research Synthesis Methods*, 11:  
20 641-654.
- 21 [8].D. Luo, X. Wan, J. Liu and T. Tong\* (2018), "Optimally estimating the sample mean from the  
22 sample size, median, mid-range and/or mid-quartile range", *Statistical Methods in Medical  
23 Research*, 27: 1785-1805.
- 24 [9].X. Wan, W. Wang, J. Liu and T. Tong\* (2014), "Estimating the sample mean and standard  
25 deviation from the sample size, median, range and/or interquartile range", *BMC Medical  
26 Research Methodology*, 14: 135.
- 27 [10].Salanti G, Ades AE, Ioannidis JP. Graphical methods and numerical summaries for presenting  
28 results from multiple-treatment meta-analysis: an overview and tutorial. *J Clin Epidemiol*  
29 2011;64:163–71.
- 30 [11].Srinivasan KK, Leo AM, Iohom G, Loughnane F, Lee PJ. Pre-procedure ultrasound-guided  
31 paramedian spinal anaesthesia at L5-S1: Is this better than landmark-guided midline approach? A  
32 randomised controlled trial. *Indian J Anaesth*. 2018 Jan;62(1):53-60.
- 33 [12].Dhanger S, Vinayagam S, Vaidhyanathan B, Rajesh IJ, Tripathy DK. Comparison of landmark  
34 versus pre-procedural ultrasonography-assisted midline approach for identification of  
35 subarachnoid space in elective caesarean section: A randomised controlled trial. *Indian J  
36 Anaesth*. 2018 Apr;62(4):280-284.
- 37 [13].Arzola C, Mikhael R, Margarido C, Carvalho JC. Spinal ultrasound versus palpation for  
38 epidural catheter insertion in labour: A randomised controlled trial. *Eur J Anaesthesiol*. 2015  
39 Jul;32(7):499-505.
- 40 [14].Lim YC, Choo CY, Tan KT. A randomised controlled trial of ultrasound-assisted spinal  
41 anaesthesia. *Anaesth Intensive Care*. 2014 Mar;42(2):191-8.
- 42 [15].Chin A, Croke B, Heywood L, Brijball R, Pelecanos AM, Abeyapala W. A randomised  
43 controlled trial comparing needle movements during combined spinal-epidural anaesthesia with  
44 and without ultrasound assistance. *Anaesthesia*. 2018 Apr;73(4):466-473.
- 45 [16].Tao B, Liu K, Ding M, Xue H, Li X, Zhao P. Ultrasound increases the success rate of spinal  
46 needle placement through the epidural needle during combined spinal-epidural anaesthesia: A  
47  
48  
49  
50  
51  
52  
53  
54  
55  
56  
57  
58  
59  
60

- 1  
2  
3 randomised controlled study. *Eur J Anaesthesiol.* 2021 Mar 1;38(3):251-258.
- 4 [17].Khan MA, Gupta M, Sharma S, Kasaudhan S. A comparative study of ultrasound assisted  
5 versus landmark technique for combined spinal-epidural anaesthesia in patients undergoing  
6 lower limb orthopaedic surgery. *Indian J Anaesth.* 2022 Apr;66(4):272-277.
- 7 [18].Li M, Ni X, Xu Z, Shen F, Song Y, Li Q, Liu Z. Ultrasound-Assisted Technology Versus the  
8 Conventional Landmark Location Method in Spinal Anesthesia for Cesarean Delivery in Obese  
9 Parturients: A Randomized Controlled Trial. *Anesth Analg.* 2019 Jul;129(1):155-161.
- 10 [19].Park SK, Yoo S, Kim WH, Lim YJ, Bahk JH, Kim JT. Ultrasound-assisted vs. landmark-guided  
11 paramedian spinal anaesthesia in the elderly: A randomised controlled trial. *Eur J Anaesthesiol.*  
12 2019 Oct;36(10):763-771.
- 13 [20].Tawfik MM, Atallah MM, Elkhaboutly WS, Allakkany NS, Abdelkhalek M. Does  
14 Preprocedural Ultrasound Increase the First-Pass Success Rate of Epidural Catheterization Before  
15 Cesarean Delivery? A Randomized Controlled Trial. *Anesth Analg.* 2017 Mar;124(3):851-856.
- 16 [21].Park SK, Bae J, Yoo S, Kim WH, Lim YJ, Bahk JH, Kim JT. Ultrasound-Assisted Versus  
17 Landmark-Guided Spinal Anesthesia in Patients With Abnormal Spinal Anatomy: A Randomized  
18 Controlled Trial. *Anesth Analg.* 2020 Mar;130(3):787-795.
- 19 [22].Qu B, Chen L, Zhang Y, Jiang M, Wu C, Ma W, Li Y. Correction to: Landmark-guided versus  
20 modified ultrasound-assisted Paramedian techniques in combined spinal-epidural anesthesia for  
21 elderly patients with hip fractures: a randomized controlled trial. *BMC Anesthesiol.* 2020 Oct  
22 23;20(1):268.
- 23 [23].Ni X, Li MZ, Zhou SQ, Xu ZD, Zhang YQ, Yu YB, Su J, Zhang LM, Liu ZQ. Accuro  
24 ultrasound-based system with computer-aided image interpretation compared to traditional  
25 palpation technique for neuraxial anesthesia placement in obese parturients undergoing  
26 cesarean delivery: a randomized controlled trial. *J Anesth.* 2021 Aug;35(4):475-482.
- 27 [24].Chong SE, Mohd Nikman A, Saedah A, Wan Mohd Nazaruddin WH, Kueh YC, Lim JA, Shamsul  
28 Kamalrujan H. Real-time ultrasound-guided paramedian spinal anaesthesia: evaluation of the  
29 efficacy and the success rate of single needle pass. *Br J Anaesth.* 2017 May 1;118(5):799-801.
- 30 [25].Mital T, Kamal M, Kumar M, Kumar R, Bhatia P, Singariya G. Comparison of landmark and  
31 real-time ultrasound-guided epidural catheter placement in the pediatric population: a  
32 prospective randomized comparative trial. *Anesth Pain Med (Seoul).* 2021 Oct;16(4):368-376.
- 33 [26].Pakpirom J, Thatsanapornsathit K, Kovitwanawong N, Petsakul S, Benjhawaleemas P,  
34 Narunart K, Boonchuduang S, Karmakar MK. Real-time ultrasound-guided versus anatomic  
35 landmark-based thoracic epidural placement: a prospective, randomized, superiority trial. *BMC*  
36 *Anesthesiol.* 2022 Jun 25;22(1):198.
- 37 [27].Jindi Jiang, Yujie Xu, Mingfeng He. Real-time ultrasound-guided vs. anatomical  
38 landmark-guided paramedian epidural anesthesia in overweight parturients undergoing  
39 analgesic labor: a randomized controlled trial. *Signa Vitae.* 2021. 17(6);66-73.
- 40 [28].Elsharkawy H, Maheshwari A, Babazade R, Perlas A, Zaky S, Mounir-Soliman L. Real-time  
41 ultrasound-guided spinal anesthesia in patients with predicted difficult anatomy. *Minerva*  
42 *Anesthesiol.* 2017 May;83(5):465-473.
- 43 [29].Yasser Mohamed Mohamed Osman. Comparing between ultrasound-assisted epidural  
44 catheter placement using Accuro and the use of ultrasound real time with acoustic  
45 puncture-assisted device to confirm epidural space end point, *Egyptian Journal of*  
46 *Anaesthesia.* 2020,36:1, 140-146
- 47  
48  
49  
50  
51  
52  
53  
54  
55  
56  
57  
58  
59  
60



- 1  
2  
3 [30].Bhardwaj D, Thakur L, Sharma S, Rana S, Gupta B, Sharma C. Comparative evaluation of  
4 three techniques for paramedian subarachnoid block: Point-of-care preprocedural ultrasound  
5 assisted, real-time ultrasound guided and landmark based. *Indian J Anaesth.* 2022 Mar;66(Suppl  
6 2):S102-S107.  
7  
8 [31]. Nassar M, Abdelazim IA. Pre-puncture ultrasound guided epidural insertion before vaginal  
9 delivery. *J Clin Monit Comput* 2015;29:573-7.  
10  
11 [32]. Rasoulia A, Lohser J, Najafi M, Rafii- Tari H, Tran D, Kamani AA, et al. Utility of prepuncture  
12 ultrasound for localization of the thoracic epidural space. *Can J Anaesth* 2011;58:815-23.  
13  
14 [33]. Hurdle MF. Ultrasound-Guided Spinal Procedures for Pain: A Review. *Phys Med Rehabil Clin*  
15 *N Am* 2016;27:673-86.  
16  
17 [34].Grau T, Leipold RW, Conradi R, Martin E, Motsch J. Efficacy of ultrasound imaging in  
18 obstetric epidural anesthesia. *J Clin Anesth* 2002; 14: 169-75.  
19  
20 [35].Grau T, Leipold RW, Conradi R, Martin E, Motsch J. Ultrasound imaging facilitates localization  
21 of the epidural space during combined spinal and epidural anesthesia. *Reg Anesth Pain Med*  
22 2001; 26: 64-7.  
23  
24 [36].National Institute of Health and Clinical Excellence. Ultrasound Guided Regional Nerve Block  
25 (IPG285).January 2013.  
26  
27 [37].Chin KJ, Ramlogan R, Arzola C, Singh M, Chan V. The utility of ultrasound imaging in  
28 predicting ease of performance of spinal anaesthesia in an orthopedic patient population. *Reg*  
29 *Anesth Pain Med* 2013;38:34-8.  
30  
31 [38]. Vogt M, van Gerwen DJ, Lubbers W, et al. Optimal point of insertion and needle angle in  
32 neuraxial blockade using a midline approach: a study in computed tomography scans of adult  
33 patients. *Reg Anesth Pain Med* 2017; 42:600 – 608.  
34  
35 [39].Kim H, Won D, Chang JE, et al. Ultrasound assessment of the anatomic landmarks for spinal  
36 anesthesia in elderly patients with hip fracture: a prospective observational study. *Medicine*  
37 (Baltimore). 2019;98:e16388.  
38  
39 [40].Karmakar MK, Li X, Ho AM, Kwok WH, Chui PT. Real-time ultrasound-guided paramedian  
40 epidural access:evaluation of a novel in-plane technique. *Br J Anaesth.*2009;102:845 – 854.  
41  
42 [41].Conroy PH, Luyet C, McCartney CJ, McHardy PG. Real-time ultrasound-guided spinal  
43 anaesthesia: a prospective observational study of a new approach. *Anesthesiol Res Pract.*  
44 2013;2013:525818.  
45  
46 [42].Liu Y, Qian W, Ke XJ, Mei W. Real-time ultrasound-guided spinal anesthesia using a new  
47 paramedian transverse approach. *Curr Med Sci.* 2018;38:910 – 913.  
48  
49 [43].Shaikh F, Brzezinski J, Alexander S, Arzola C, Jose CA, Carvalho JCA, et al. Ultrasound imaging  
50 for lumbar punctures and epidural catheterisations: systematic review and meta-analysis. *BMJ*  
51 2013;346:f1720.  
52  
53 [44].Celleno D, Gollo E, Uskok M. Analgesia anestesia terapia intensiva in ostetricia. Torino:  
54 Edizioni Minerva Medica; 2006.  
55  
56 [45].Tran D, Kamani AA, Al-Attas E, et al. Single-operator real-time ultrasound-guidance to aim  
57 and insert alumar epidural needle. *Canad J Anesth* 2010;57(4):313 – 21.  
58  
59 [46].Park SK, Cheun H, Kim YW, Bae J, Yoo S, Kim WH, Lim YJ, Kim JT. Ultrasound-assisted spinal  
60 anesthesia: A randomized comparison between midline and paramedian approaches. *J Clin*  
*Anesth.* 2022 Sep;80:110823.  
[47].Perna P, Gioia A, Ragazzi R, Volta CA, Innamorato M. Can pre-procedure neuroaxial

1  
2  
3 ultrasound improve the identification of the potential epidural space when compared with  
4 anatomical landmarks? A prospective randomized study. *Minerva Anesthesiol.* 2017  
5 Jan;83(1):41-49.  
6  
7  
8  
9  
10  
11  
12  
13  
14  
15  
16  
17  
18  
19  
20  
21  
22  
23  
24  
25  
26  
27  
28  
29  
30  
31  
32  
33  
34  
35  
36  
37  
38  
39  
40  
41  
42  
43  
44  
45  
46  
47  
48  
49  
50  
51  
52  
53  
54  
55  
56  
57  
58  
59  
60

For peer review only





Fig.1.Flow diagram

239x229mm (144 x 144 DPI)

|                            | Random sequence generation (selection bias) | Allocation concealment (selection bias) | Blinding of participants and personnel (performance bias) | Blinding of outcome assessment (detection bias) | Incomplete outcome data (attrition bias) | Selective reporting (reporting bias) | Other bias |
|----------------------------|---------------------------------------------|-----------------------------------------|-----------------------------------------------------------|-------------------------------------------------|------------------------------------------|--------------------------------------|------------|
| A. Chin 2018               | +                                           | +                                       | ?                                                         | +                                               | ?                                        | +                                    | ?          |
| Bertam 2017                | ?                                           | ?                                       | ?                                                         | ?                                               | +                                        | +                                    | ?          |
| Bingdong Tao2021           | +                                           | +                                       | +                                                         | +                                               | ?                                        | +                                    | ?          |
| Bo Qu2020                  | +                                           | +                                       | ?                                                         | +                                               | +                                        | +                                    | ?          |
| Cristian Arzola 2015       | +                                           | ?                                       | +                                                         | ?                                               | +                                        | +                                    | ?          |
| Deepak Bhardwaj 2022       | +                                           | +                                       | +                                                         | ?                                               | +                                        | +                                    | ?          |
| Hesham2017                 | +                                           | +                                       | ?                                                         | +                                               | ?                                        | +                                    | ?          |
| Jatuporn Pakpirom2020      | +                                           | +                                       | +                                                         | +                                               | ?                                        | +                                    | ?          |
| Jindi Jiang2021            | +                                           | +                                       | +                                                         | +                                               | +                                        | +                                    | +          |
| Karthikeyan 2018           | +                                           | +                                       | ?                                                         | ?                                               | +                                        | +                                    | ?          |
| Luying Chen2021            | +                                           | ?                                       | ?                                                         | +                                               | +                                        | +                                    | ?          |
| Mengzhu Li2019             | +                                           | +                                       | +                                                         | +                                               | +                                        | +                                    | ?          |
| Mohamed Mohamed Tawfik2017 | +                                           | +                                       | +                                                         | +                                               | ?                                        | +                                    | ?          |
| Mohd Anas Khan2022         | +                                           | +                                       | +                                                         | +                                               | +                                        | +                                    | ?          |
| Parli Raghavan Ravi2021    | +                                           | ?                                       | ?                                                         | +                                               | +                                        | +                                    | ?          |
| Sangeeta Dhanger 2018      | +                                           | +                                       | ?                                                         | +                                               | +                                        | +                                    | ?          |
| Sun-Kyung Park2019         | +                                           | +                                       | ?                                                         | +                                               | +                                        | +                                    | ?          |
| Sun-Kyung Park2020         | +                                           | +                                       | ?                                                         | +                                               | +                                        | +                                    | ?          |
| Tanya Mital2021            | +                                           | +                                       | ?                                                         | +                                               | +                                        | +                                    | ?          |
| Xiu Ni 2021                | +                                           | +                                       | +                                                         | ?                                               | +                                        | +                                    | ?          |
| Y. C. Lim 2014             | +                                           | +                                       | ?                                                         | ?                                               | +                                        | +                                    | ?          |
| Yasser Mohamed 2020        | +                                           | ?                                       | ?                                                         | ?                                               | +                                        | +                                    | ?          |

Fig.2.Consensus risk-of-bias assessment of the included studies.

146x353mm (72 x 72 DPI)

**Search strategy**

Embase ( Performed on 31 September 2022 )

|    |                                                                                                                                                   |
|----|---------------------------------------------------------------------------------------------------------------------------------------------------|
| #1 | 'real time ultrasound guided' OR 'ultrasound assisted' OR 'landmark palpation' OR 'traditional positioning'                                       |
| #2 | 'spinal anesthesia'/exp OR 'spinal anesthesia' OR 'epidural anesthesia'/exp OR 'epidural anesthesia' OR 'combined spinal and epidural anesthesia' |
| #3 | #1 AND #2 AND [controlled clinical trial]/lim                                                                                                     |

PubMed ( Performed on 31 September 2022 )

|    |                                                                                                     |
|----|-----------------------------------------------------------------------------------------------------|
| #1 | real time ultrasound guided OR ultrasound assisted OR landmark palpation OR traditional positioning |
| #2 | spinal anesthesia OR epidural anesthesia OR combined spinal and epidural anesthesia                 |
| #3 | #1 AND #2 (Filters applied: Randomized Controlled Trial)                                            |

Web of science ( Performed on 31 September 2022 )

|    |                                                                                                          |
|----|----------------------------------------------------------------------------------------------------------|
| #1 | TS=(real time ultrasound guided OR ultrasound assisted OR landmark palpation OR traditional positioning) |
| #2 | TS=(spinal anesthesia OR epidural anesthesia OR combined spinal and epidural anesthesia)                 |
| #3 | #1 AND #2 and Clinical Trial                                                                             |

Cochrane Library ( Performed on 31 September 2022 )

|    |                                                                                                               |
|----|---------------------------------------------------------------------------------------------------------------|
| #1 | ("real time ultrasound guided" OR "ultrasound assisted" OR "landmark palpation" OR "traditional positioning") |
| #2 | ("spinal anesthesia" OR "epidural anesthesia" OR "combined spinal and epidural anesthesia")                   |
| #3 | #1 AND #2 in Trials(search limit)                                                                             |

**Inconsistency analysis, local inconsistency test, consistency analysis, ring inconsistency detection of each outcome index****First pass**

Inconsistency analysis

Chi2 (3) =1.82 Prob &gt; chi2 = 0.6113

local inconsistency test ( node-splitting method )

| Side | Direct Coef. | Std. Err. | Indierect Coef. | Std. Err. | Difference Coef. | Std. Err. | P>  z | tau   |
|------|--------------|-----------|-----------------|-----------|------------------|-----------|-------|-------|
| AB   | 0.488        | 0.162     | 0.596           | 0.45      | -0.108           | 0.481     | 0.822 | 0.511 |
| AC   | 0.526        | 0.262     | 0.719           | 0.375     | -0.194           | 0.455     | 0.671 | 0.518 |
| BC   | 0.099        | 0.287     | 0.074           | 0.340     | 0.026            | 0.466     | 0.954 | 0.517 |

consistency analysis

|     | Coef. | Std. Err. | z    | P>  z | [95% Conf. Interval] |
|-----|-------|-----------|------|-------|----------------------|
| A-B | 0.498 | 0.148     | 3.36 | 0.001 | 0.207,0.788          |
| A-C | 0.584 | 0.208     | 2.81 | 0.005 | 0.176,0.992          |

## ring inconsistency detection

| Loop  | IF    | self  | z_value | P_value | CI_95       | Loop_Heterog_tau2 |
|-------|-------|-------|---------|---------|-------------|-------------------|
| A-B-C | 0.083 | 0.667 | 0.125   | 0.901   | (0.00,1.39) | 0.228             |

**First attempt**

## Inconsistency analysis

Chi2 (3) =1.92 Prob > chi2 = 0.5887

## local inconsistency test (node-splitting method)

| Side | Direct Coef. | Std. Err. | Indierect Coef. | Std. Err. | Difference Coef. | Std. Err. | P>  z | tau   |
|------|--------------|-----------|-----------------|-----------|------------------|-----------|-------|-------|
| AB   | 0.412        | 0.134     | 0.449           | 0.345     | -0.037           | 0.371     | 0.920 | 0.365 |
| AC   | 0.369        | 0.166     | 0.592           | 0.320     | -0.223           | 0.359     | 0.534 | 0.364 |
| BC   | 0.037        | 0.237     | -0.034          | 0.234     | 0.071            | 0.333     | 0.830 | 0.367 |

## consistency analysis

|     | Coef. | Std. Err. | z    | P>  z | [95% Conf. Interval] |
|-----|-------|-----------|------|-------|----------------------|
| A-B | 0.415 | 0.120     | 3.44 | 0.001 | 0.179,0.651          |
| A-C | 0.413 | 0.144     | 2.87 | 0.004 | 0.131,0.695          |

## ring inconsistency detection

| Loop  | IF    | self  | z_value | P_value | CI_95       | Loop_Heterog_tau2 |
|-------|-------|-------|---------|---------|-------------|-------------------|
| A-B-C | 0.126 | 0.319 | 0.395   | 0.693   | (0.00,0.75) | 0.106             |

**Identify time**

## Inconsistency analysis

Chi2 (3) =6.42 Prob > chi2 = 0.0928

## local inconsistency test (node-splitting method)

| Side | Direct Coef. | Std. Err. | Indierect Coef. | Std. Err. | Difference Coef. | Std. Err. | P>  z | tau   |
|------|--------------|-----------|-----------------|-----------|------------------|-----------|-------|-------|
| AB   | 1.528        | 0.568     | 5.956           | 1.717     | -4.427           | 1.809     | 0.014 | 1.678 |
| AC   | 3.139        | 1.145     | 0.512           | 1.497     | 2.627            | 1.885     | 0.163 | 1.941 |
| BC   | -0.949       | 1.076     | 2.273           | 1.455     | -3.222           | 1.810     | 0.075 | 1.851 |

## consistency analysis

|     | Coef. | Std. Err. | z    | P>  z | [95% Conf. Interval] |
|-----|-------|-----------|------|-------|----------------------|
| A-B | 1.977 | 0.644     | 3.07 | 0.002 | 0.715,3.204          |
| A-C | 2.174 | 0.943     | 2.30 | 0.021 | 0.176,4.023          |

## ring inconsistency detection

| Loop  | IF    | seIF  | z_value | P_value | CI_95       | Loop_Heterog_tau2 |
|-------|-------|-------|---------|---------|-------------|-------------------|
| A-B-C | 2.378 | 1.745 | 1.363   | 0.173   | (0.00,5.80) | 2.322             |

**Time of procedure spinal**

## Inconsistency analysis

Chi2 (3) =7.30 Prob > chi2 = 0.0629

## local inconsistency test (node-splitting method)

| Side | Direct Coef. | Std. Err. | Indierect Coef. | Std. Err. | Difference Coef. | Std. Err. | P> z  | tau   |
|------|--------------|-----------|-----------------|-----------|------------------|-----------|-------|-------|
| AB   | -0.790       | 0.356     | 0.657           | 1.360     | -1.447           | 1.405     | 0.303 | 0.913 |
| AC   | 1.401        | 0.628     | -0.323          | 0.864     | 1.724            | 1.065     | 0.106 | 0.834 |
| BC   | 1.342        | 0.710     | 1.844           | 1.027     | -0.501           | 1.247     | 0.688 | 0.975 |

## consistency analysis

|     | Coef.  | Std. Err. | z     | P> z  | [95% Conf. Interval] |
|-----|--------|-----------|-------|-------|----------------------|
| A-B | -0.697 | 0.348     | -2.01 | 0.045 | -1.378,-0.016        |
| A-C | 0.806  | 0.557     | 1.45  | 0.148 | -0.286,1.899         |

## ring inconsistency detection

| Loop  | IF    | seIF  | z_value | P_value | CI_95       | Loop_Heterog_tau2 |
|-------|-------|-------|---------|---------|-------------|-------------------|
| A-B-C | 0.890 | 1.119 | 0.796   | 0.426   | (0.00,3.08) | 0.932             |

**subgroup analysis****Obesity/Maternity****First pass**

## Inconsistency analysis

Chi2 (3) =0.29 Prob > chi2 = 0.5896

## local inconsistency test (node-splitting method)

| Side | Direct Coef. | Std. Err. | Indierect Coef. | Std. Err. | Difference Coef. | Std. Err. | P> z  | tau   |
|------|--------------|-----------|-----------------|-----------|------------------|-----------|-------|-------|
| AB   | 0.454        | 0.195     | 0.076           | 0.665     | 0.378            | 0.698     | 0.588 | 0.435 |
| AC   | 0.636        | 0.541     | 1.012           | 0.441     | -0.376           | 0.698     | 0.590 | 0.435 |
| BC   | 0.559        | 0.389     | 0.182           | 0.575     | 0.377            | 0.698     | 0.589 | 0.435 |

## consistency analysis

|     | Coef. | Std. Err. | z    | P> z  | [95% Conf. Interval] |
|-----|-------|-----------|------|-------|----------------------|
| A-B | 0.419 | 0.165     | 2.54 | 0.011 | 0.096,0.743          |
| A-C | 0.845 | 0.310     | 2.73 | 0.006 | 0.238,1.452          |

## ring inconsistency detection

| Loop  | IF    | self  | z_value | P_value | CI_95       | Loop_Heterog_tau2 |
|-------|-------|-------|---------|---------|-------------|-------------------|
| A-B-C | 0.257 | 0.732 | 0.351   | 0.726   | (0.00,1.69) | 0.094             |

**First attempt**

## Inconsistency analysis

Chi2 (3) =1.47 Prob > chi2 = 0.2260

## local inconsistency test (node-splitting method)

| Side | Direct Coef. | Std. Err. | Indierect Coef. | Std. Err. | Difference Coef. | Std. Err. | P> z  | tau   |
|------|--------------|-----------|-----------------|-----------|------------------|-----------|-------|-------|
| AB   | 0.545        | 0.325     | -0.529          | 0.825     | 1.074            | 0.887     | 0.226 | 0.539 |
| AC   | 0.251        | 0.555     | 1.325           | 0.692     | -1.074           | 0.887     | 0.226 | 0.539 |
| BC   | 0.780        | 0.610     | -0.294          | 0.643     | 1.074            | 0.887     | 0.226 | 0.539 |

## consistency analysis

|     | Coef. | Std. Err. | z    | P> z  | [95% Conf. Interval] |
|-----|-------|-----------|------|-------|----------------------|
| A-B | 0.403 | 0.322     | 1.25 | 0.210 | -0.227,1.033         |
| A-C | 0.678 | 0.462     | 1.47 | 0.142 | -0.227,1.583         |

## ring inconsistency detection

| Loop  | IF    | self  | z_value | P_value | CI_95       | Loop_Heterog_tau2 |
|-------|-------|-------|---------|---------|-------------|-------------------|
| A-B-C | 1.072 | 0.890 | 1.204   | 0.228   | (0.00,2.82) | 0.272             |

**Elderly/Abnormal Spinal Anatomy****First attempt**

## Inconsistency analysis

Chi2 (3) =0.33 Prob > chi2 = 0.5674

## local inconsistency test (node-splitting method)

| Side | Direct Coef. | Std. Err. | Indierect Coef. | Std. Err. | Difference Coef. | Std. Err. | P> z  | tau   |
|------|--------------|-----------|-----------------|-----------|------------------|-----------|-------|-------|
| AB   | 0.663        | 0.114     | 0.536           | 0.191     | 0.128            | 0.223     | 0.567 | 0.000 |
| AC   | 0.108        | 0.129     | 0.236           | 0.182     | -0.127           | 0.223     | 0.567 | 0.000 |
| BC   | -0.427       | 0.141     | -0.555          | 0.172     | 0.127            | 0.223     | 0.567 | 0.000 |

## consistency analysis

|     | Coef. | Std. Err. | z    | P> z  | [95% Conf. Interval] |
|-----|-------|-----------|------|-------|----------------------|
| A-B | 0.630 | 0.098     | 6.41 | 0.000 | 0.437,0.822          |
| A-C | 0.151 | 0.105     | 1.43 | 0.151 | -0.055,0.357         |

## ring inconsistency detection

| Loop  | IF    | self  | z_value | P_value | CI_95       | Loop_Heterog_tau2 |
|-------|-------|-------|---------|---------|-------------|-------------------|
| A-B-C | 1.072 | 0.890 | 1.204   | 0.228   | (0.00,2.82) | 0.272             |

|       |       |       |       |       |             |       |
|-------|-------|-------|-------|-------|-------------|-------|
| A-B-C | 0.127 | 0.223 | 0.572 | 0.567 | (0.00,0.56) | 0.000 |
|-------|-------|-------|-------|-------|-------------|-------|

A: Traditional positioning B:Ultrasound assistance C: Real-time guidance

Figure 1S

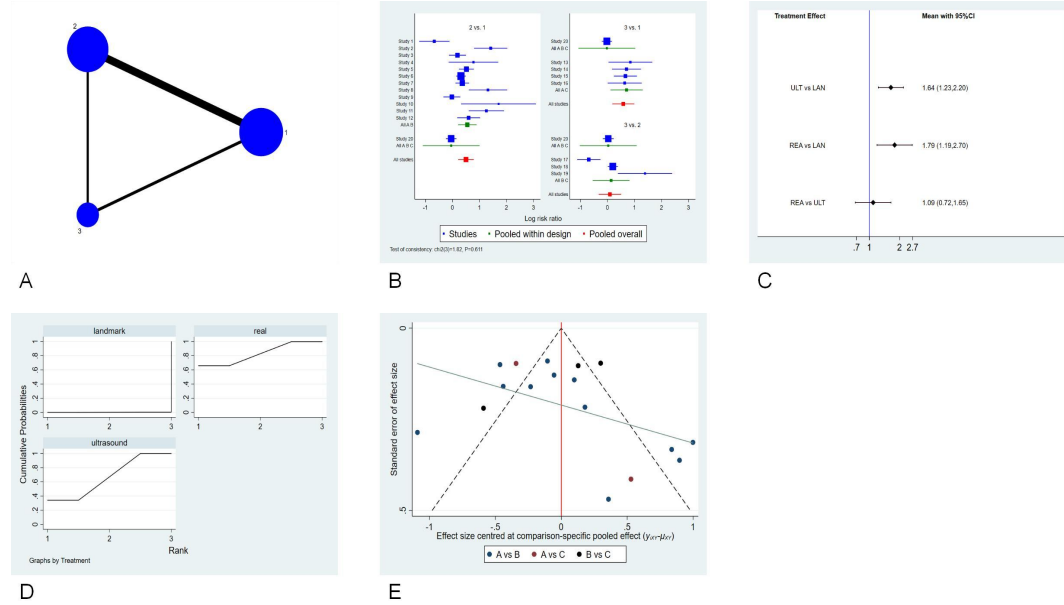

Figure 2S

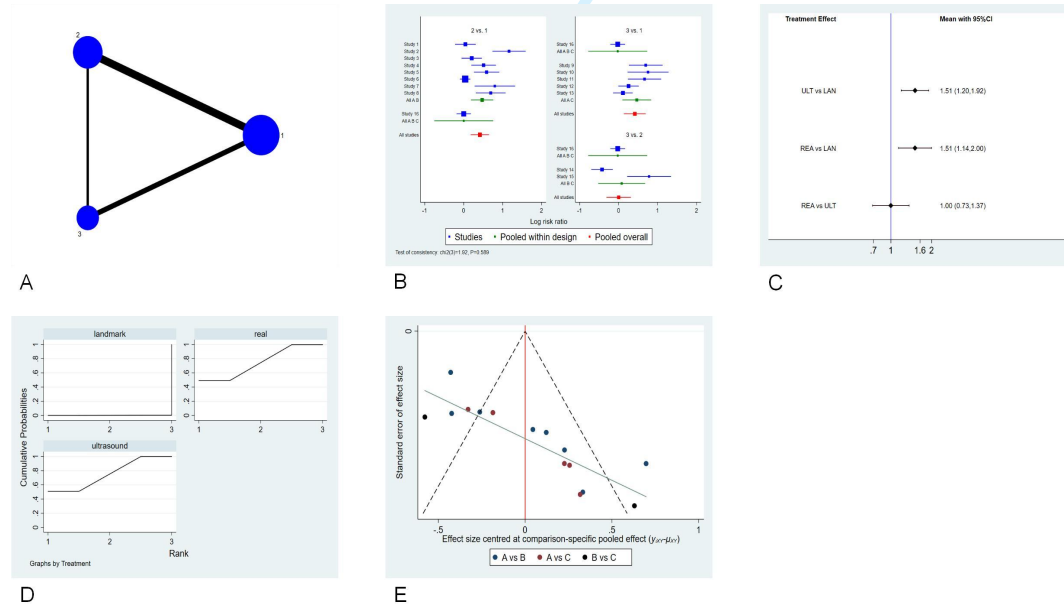

Figure 3S



Figure 4S

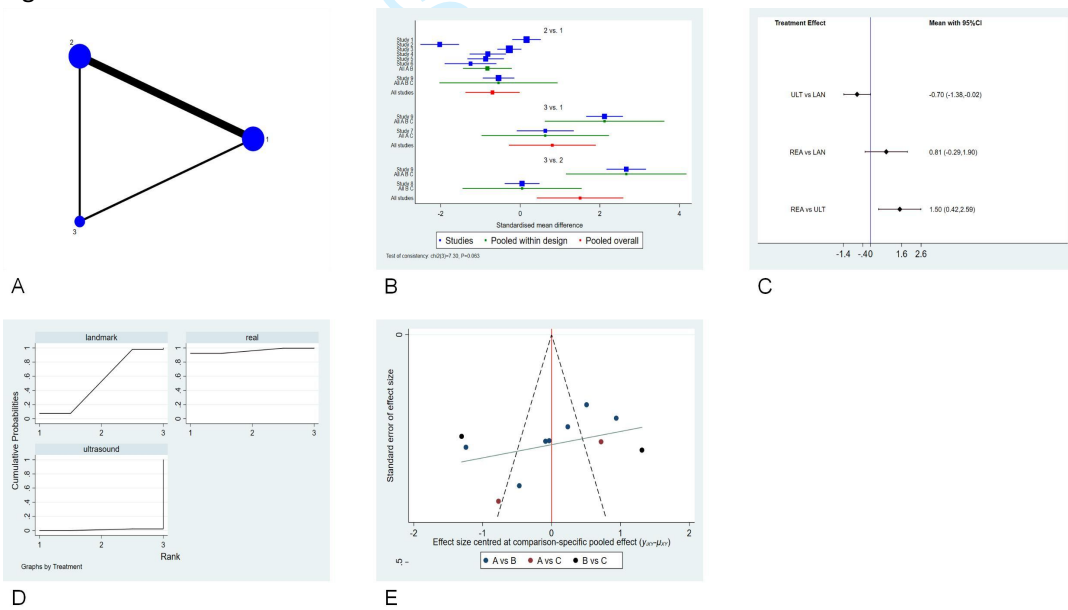

Figure 5S



1  
2  
3  
4  
5  
6  
7  
8  
9  
10  
11  
12  
13  
14  
15  
16  
17  
18  
19  
20  
21  
22  
23  
24  
25  
26  
27  
28  
29  
30  
31  
32  
33  
34  
35  
36  
37  
38  
39  
40  
41  
42  
43  
44  
45  
46  
47  
48  
49  
50  
51  
52  
53  
54  
55  
56  
57  
58  
59  
60

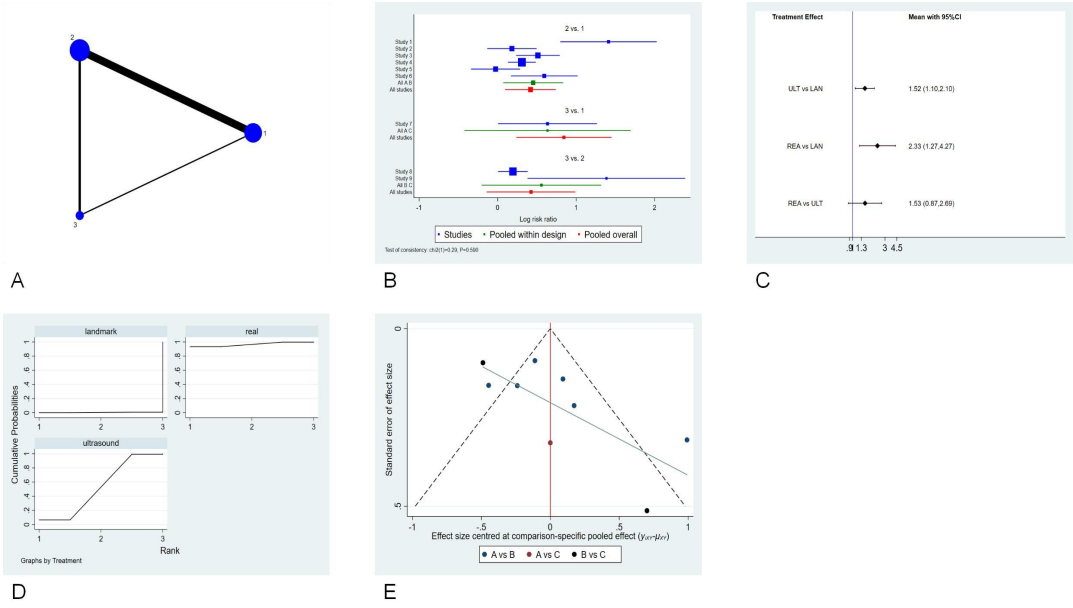

Figure 6S

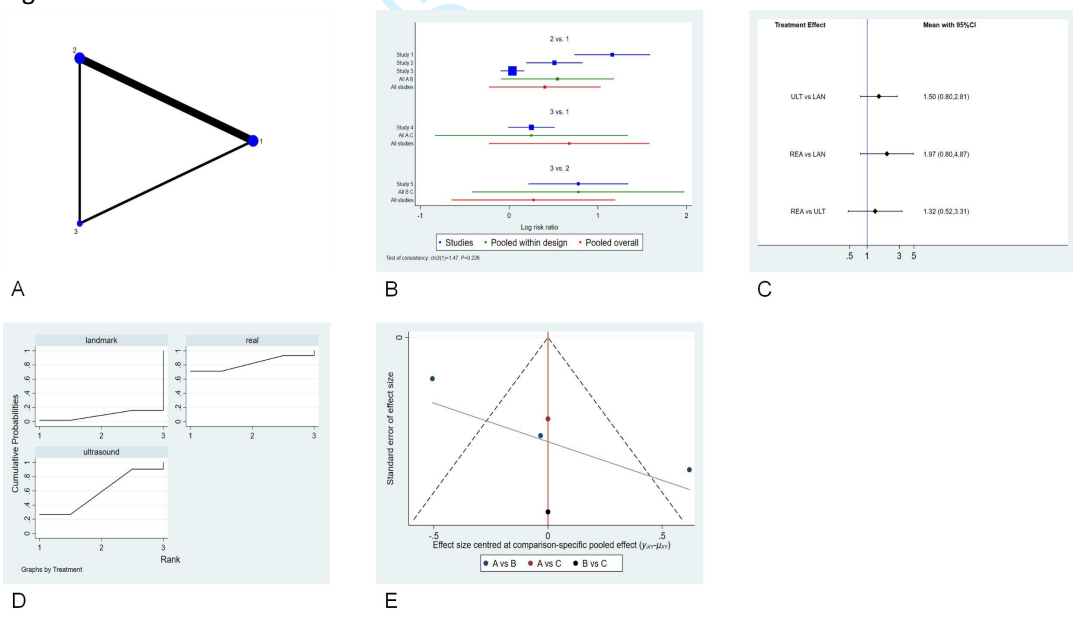

Figure 7S

1  
2  
3  
4  
5  
6  
7  
8  
9  
10  
11  
12  
13  
14  
15  
16  
17  
18  
19  
20  
21  
22  
23  
24  
25  
26  
27  
28  
29  
30  
31  
32  
33  
34  
35  
36  
37  
38  
39  
40  
41  
42  
43  
44  
45  
46  
47  
48  
49  
50  
51  
52  
53  
54  
55  
56  
57  
58  
59  
60



A



B



C



D



E

peer review only



## PRISMA 2020 Checklist

| Section and Topic             | Item # | Checklist item                                                                                                                                                                                                                                                                                       | Location where item is reported |
|-------------------------------|--------|------------------------------------------------------------------------------------------------------------------------------------------------------------------------------------------------------------------------------------------------------------------------------------------------------|---------------------------------|
| <b>TITLE</b>                  |        |                                                                                                                                                                                                                                                                                                      |                                 |
| Title                         | 1      | Identify the report as a systematic review.                                                                                                                                                                                                                                                          | Page1                           |
| <b>ABSTRACT</b>               |        |                                                                                                                                                                                                                                                                                                      |                                 |
| Abstract                      | 2      | See the PRISMA 2020 for Abstracts checklist.                                                                                                                                                                                                                                                         | Page1                           |
| <b>INTRODUCTION</b>           |        |                                                                                                                                                                                                                                                                                                      |                                 |
| Rationale                     | 3      | Describe the rationale for the review in the context of existing knowledge.                                                                                                                                                                                                                          | Page1                           |
| Objectives                    | 4      | Provide an explicit statement of the objective(s) or question(s) the review addresses.                                                                                                                                                                                                               | Page1                           |
| <b>METHODS</b>                |        |                                                                                                                                                                                                                                                                                                      |                                 |
| Eligibility criteria          | 5      | Specify the inclusion and exclusion criteria for the review and how studies were grouped for the syntheses.                                                                                                                                                                                          | Page2                           |
| Information sources           | 6      | Specify all databases, registers, websites, organisations, reference lists and other sources searched or consulted to identify studies. Specify the date when each source was last searched or consulted.                                                                                            | Page2                           |
| Search strategy               | 7      | Present the full search strategies for all databases, registers and websites, including any filters and limits used.                                                                                                                                                                                 | Page3                           |
| Selection process             | 8      | Specify the methods used to decide whether a study met the inclusion criteria of the review, including how many reviewers screened each record and each report retrieved, whether they worked independently, and if applicable, details of automation tools used in the process.                     | Page3                           |
| Data collection process       | 9      | Specify the methods used to collect data from reports, including how many reviewers collected data from each report, whether they worked independently, any processes for obtaining or confirming data from study investigators, and if applicable, details of automation tools used in the process. | Page3                           |
| Data items                    | 10a    | List and define all outcomes for which data were sought. Specify whether all results that were compatible with each outcome domain in each study were sought (e.g. for all measures, time points, analyses), and if not, the methods used to decide which results to collect.                        | Page3                           |
|                               | 10b    | List and define all other variables for which data were sought (e.g. participant and intervention characteristics, funding sources). Describe any assumptions made about any missing or unclear information.                                                                                         | Page3                           |
| Study risk of bias assessment | 11     | Specify the methods used to assess risk of bias in the included studies, including details of the tool(s) used, how many reviewers assessed each study and whether they worked independently, and if applicable, details of automation tools used in the process.                                    | Page3                           |
| Effect measures               | 12     | Specify for each outcome the effect measure(s) (e.g. risk ratio, mean difference) used in the synthesis or presentation of results.                                                                                                                                                                  | Page3                           |
| Synthesis methods             | 13a    | Describe the processes used to decide which studies were eligible for each synthesis (e.g. tabulating the study intervention characteristics and comparing against the planned groups for each synthesis (item #5)).                                                                                 | Page4                           |
|                               | 13b    | Describe any methods required to prepare the data for presentation or synthesis, such as handling of missing summary statistics, or data conversions.                                                                                                                                                | Page3                           |
|                               | 13c    | Describe any methods used to tabulate or visually display results of individual studies and syntheses.                                                                                                                                                                                               |                                 |
|                               | 13d    | Describe any methods used to synthesize results and provide a rationale for the choice(s). If meta-analysis was performed, describe the model(s), method(s) to identify the presence and extent of statistical heterogeneity, and software package(s) used.                                          | Page3                           |
|                               | 13e    | Describe any methods used to explore possible causes of heterogeneity among study results (e.g. subgroup analysis, meta-regression).                                                                                                                                                                 | Page3                           |
|                               | 13f    | Describe any sensitivity analyses conducted to assess robustness of the synthesized results.                                                                                                                                                                                                         |                                 |
| Reporting bias assessment     | 14     | Describe any methods used to assess risk of bias due to missing results in a synthesis (arising from reporting biases).                                                                                                                                                                              | Page7                           |
| Certainty assessment          | 15     | Describe any methods used to assess certainty (or confidence) in the body of evidence for an outcome.                                                                                                                                                                                                | Page4                           |



## PRISMA 2020 Checklist

| Section and Topic                              | Item # | Checklist item                                                                                                                                                                                                                                                                       | Location where item is reported |
|------------------------------------------------|--------|--------------------------------------------------------------------------------------------------------------------------------------------------------------------------------------------------------------------------------------------------------------------------------------|---------------------------------|
| <b>RESULTS</b>                                 |        |                                                                                                                                                                                                                                                                                      |                                 |
| Study selection                                | 16a    | Describe the results of the search and selection process, from the number of records identified in the search to the number of studies included in the review, ideally using a flow diagram.                                                                                         | Fig 1                           |
|                                                | 16b    | Cite studies that might appear to meet the inclusion criteria, but which were excluded, and explain why they were excluded.                                                                                                                                                          |                                 |
| Study characteristics                          | 17     | Cite each included study and present its characteristics.                                                                                                                                                                                                                            | Table1、 2                       |
| Risk of bias in studies                        | 18     | Present assessments of risk of bias for each included study.                                                                                                                                                                                                                         | Fig 2                           |
| Results of individual studies                  | 19     | For all outcomes, present, for each study: (a) summary statistics for each group (where appropriate) and (b) an effect estimate and its precision (e.g. confidence/credible interval), ideally using structured tables or plots.                                                     | supplemental material           |
| Results of syntheses                           | 20a    | For each synthesis, briefly summarise the characteristics and risk of bias among contributing studies.                                                                                                                                                                               | supplemental material           |
|                                                | 20b    | Present results of all statistical syntheses conducted. If meta-analysis was done, present for each the summary estimate and its precision (e.g. confidence/credible interval) and measures of statistical heterogeneity. If comparing groups, describe the direction of the effect. | supplemental material           |
|                                                | 20c    | Present results of all investigations of possible causes of heterogeneity among study results.                                                                                                                                                                                       |                                 |
|                                                | 20d    | Present results of all sensitivity analyses conducted to assess the robustness of the synthesized results.                                                                                                                                                                           | supplemental material           |
| Reporting biases                               | 21     | Present assessments of risk of bias due to missing results (arising from reporting biases) for each synthesis assessed.                                                                                                                                                              | supplemental material           |
| Certainty of evidence                          | 22     | Present assessments of certainty (or confidence) in the body of evidence for each outcome assessed.                                                                                                                                                                                  | supplemental material           |
| <b>DISCUSSION</b>                              |        |                                                                                                                                                                                                                                                                                      |                                 |
| Discussion                                     | 23a    | Provide a general interpretation of the results in the context of other evidence.                                                                                                                                                                                                    | Page9                           |
|                                                | 23b    | Discuss any limitations of the evidence included in the review.                                                                                                                                                                                                                      | Page10                          |
|                                                | 23c    | Discuss any limitations of the review processes used.                                                                                                                                                                                                                                | Page10                          |
|                                                | 23d    | Discuss implications of the results for practice, policy, and future research.                                                                                                                                                                                                       | Page10                          |
| <b>OTHER INFORMATION</b>                       |        |                                                                                                                                                                                                                                                                                      |                                 |
| Registration and protocol                      | 24a    | Provide registration information for the review, including register name and registration number, or state that the review was not registered.                                                                                                                                       | Page11                          |
|                                                | 24b    | Indicate where the review protocol can be accessed, or state that a protocol was not prepared.                                                                                                                                                                                       |                                 |
|                                                | 24c    | Describe and explain any amendments to information provided at registration or in the protocol.                                                                                                                                                                                      |                                 |
| Support                                        | 25     | Describe sources of financial or non-financial support for the review, and the role of the funders or sponsors in the review.                                                                                                                                                        | Page11                          |
| Competing interests                            | 26     | Declare any competing interests of review authors.                                                                                                                                                                                                                                   | Page11                          |
| Availability of data, code and other materials | 27     | Report which of the following are publicly available and where they can be found: template data collection forms; data extracted from included studies; data used for all analyses; analytic code; any other materials used in the review.                                           | supplemental material           |



# PRISMA 2020 Checklist

- 1
- 2
- 3
- 4
- 5
- 6
- 7
- 8
- 9
- 10
- 11
- 12
- 13
- 14
- 15
- 16
- 17
- 18
- 19
- 20
- 21
- 22
- 23
- 24
- 25
- 26
- 27
- 28
- 29
- 30
- 31
- 32
- 33
- 34
- 35
- 36
- 37
- 38
- 39
- 40
- 41
- 42
- 43
- 44
- 45
- 46
- 47

From: Page MJ, McKenzie JE, Bossuyt PM, Boutron I, Hoffmann TC, Mulrow CD, et al. The PRISMA 2020 statement: an updated guideline for reporting systematic reviews. BMJ 2021;372:n71. doi: 10.1136/bmj.n71

For more information, visit: <http://www.prisma-statement.org/>

For peer review only
