# Supplementary material for: Comparison of ultrasound-guided and traditional localisation in intraspinal anesthesia: a systematic review and network meta-analysis
Source: PubMed Central journal article supplement — BMJ Open. 2023 Nov 2;13(11):e071253. doi: 10.1136/bmjopen-2022-071253 (PMC10626869; doi:10.1136/bmjopen-2022-071253), 2023-11-02
Supplement: bmjopen-2022-071253supp001.pdf [file bmjopen-2022-071253supp001.pdf]

**Search strategy**

Embase (Performed on 31 September 2022)

|    |                                                                                                                                                   |
|----|---------------------------------------------------------------------------------------------------------------------------------------------------|
| #1 | 'real time ultrasound guided' OR 'ultrasound assisted' OR 'landmark palpation' OR 'traditional positioning'                                       |
| #2 | 'spinal anesthesia'/exp OR 'spinal anesthesia' OR 'epidural anesthesia'/exp OR 'epidural anesthesia' OR 'combined spinal and epidural anesthesia' |
| #3 | #1 AND #2 AND [controlled clinical trial]/lim                                                                                                     |

PubMed (Performed on 31 September 2022)

|    |                                                                                                     |
|----|-----------------------------------------------------------------------------------------------------|
| #1 | real time ultrasound guided OR ultrasound assisted OR landmark palpation OR traditional positioning |
| #2 | spinal anesthesia OR epidural anesthesia OR combined spinal and epidural anesthesia                 |
| #3 | #1 AND #2 (Filters applied: Randomized Controlled Trial)                                            |

Web of science (Performed on 31 September 2022)

|    |                                                                                                          |
|----|----------------------------------------------------------------------------------------------------------|
| #1 | TS=(real time ultrasound guided OR ultrasound assisted OR landmark palpation OR traditional positioning) |
| #2 | TS=(spinal anesthesia OR epidural anesthesia OR combined spinal and epidural anesthesia)                 |
| #3 | #1 AND #2 and Clinical Trial                                                                             |

Cochrane Library (Performed on 31 September 2022)

|    |                                                                                                               |
|----|---------------------------------------------------------------------------------------------------------------|
| #1 | ("real time ultrasound guided" OR "ultrasound assisted" OR "landmark palpation" OR "traditional positioning") |
| #2 | ("spinal anesthesia" OR "epidural anesthesia" OR "combined spinal and epidural anesthesia")                   |
| #3 | #1 AND #2 in Trials(search limit)                                                                             |

**Inconsistency analysis, local inconsistency test, consistency analysis, ring inconsistency detection of each outcome index****First pass**

Inconsistency analysis

Chi2 (3) =1.82 Prob &gt; chi2 = 0.6113

local inconsistency test (node-splitting method)

| Side | Direct Coef. | Std. Err. | Indierect Coef. | Std. Err. | Difference Coef. | Std. Err. | P>  z | tau   |
|------|--------------|-----------|-----------------|-----------|------------------|-----------|-------|-------|
| AB   | 0.488        | 0.162     | 0.596           | 0.45      | -0.108           | 0.481     | 0.822 | 0.511 |
| AC   | 0.526        | 0.262     | 0.719           | 0.375     | -0.194           | 0.455     | 0.671 | 0.518 |
| BC   | 0.099        | 0.287     | 0.074           | 0.340     | 0.026            | 0.466     | 0.954 | 0.517 |

consistency analysis

|     | Coef. | Std. Err. | z    | P >  z | [95% Conf. Interval] |
|-----|-------|-----------|------|--------|----------------------|
| A-B | 0.498 | 0.148     | 3.36 | 0.001  | 0.207,0.788          |
| A-C | 0.584 | 0.208     | 2.81 | 0.005  | 0.176,0.992          |

## ring inconsistency detection

| Loop  | IF    | self  | z_value | P_value | CI_95       | Loop_Heterog_tau2 |
|-------|-------|-------|---------|---------|-------------|-------------------|
| A-B-C | 0.083 | 0.667 | 0.125   | 0.901   | (0.00,1.39) | 0.228             |

**First attempt**

## Inconsistency analysis

|                                     |
|-------------------------------------|
| Chi2 (3) =1.92 Prob > chi2 = 0.5887 |
|-------------------------------------|

## local inconsistency test (node-splitting method)

| Side | Direct Coef. | Std. Err. | Indierect Coef. | Std. Err. | Difference Coef. | Std. Err. | P >  z | tau   |
|------|--------------|-----------|-----------------|-----------|------------------|-----------|--------|-------|
| AB   | 0.412        | 0.134     | 0.449           | 0.345     | -0.037           | 0.371     | 0.920  | 0.365 |
| AC   | 0.369        | 0.166     | 0.592           | 0.320     | -0.223           | 0.359     | 0.534  | 0.364 |
| BC   | 0.037        | 0.237     | -0.034          | 0.234     | 0.071            | 0.333     | 0.830  | 0.367 |

## consistency analysis

|     | Coef. | Std. Err. | z    | P >  z | [95% Conf. Interval] |
|-----|-------|-----------|------|--------|----------------------|
| A-B | 0.415 | 0.120     | 3.44 | 0.001  | 0.179,0.651          |
| A-C | 0.413 | 0.144     | 2.87 | 0.004  | 0.131,0.695          |

## ring inconsistency detection

| Loop  | IF    | self  | z_value | P_value | CI_95       | Loop_Heterog_tau2 |
|-------|-------|-------|---------|---------|-------------|-------------------|
| A-B-C | 0.126 | 0.319 | 0.395   | 0.693   | (0.00,0.75) | 0.106             |

**Identify time**

## Inconsistency analysis

|                                     |
|-------------------------------------|
| Chi2 (3) =6.42 Prob > chi2 = 0.0928 |
|-------------------------------------|

## local inconsistency test (node-splitting method)

| Side | Direct Coef. | Std. Err. | Indierect Coef. | Std. Err. | Difference Coef. | Std. Err. | P >  z | tau   |
|------|--------------|-----------|-----------------|-----------|------------------|-----------|--------|-------|
| AB   | 1.528        | 0.568     | 5.956           | 1.717     | -4.427           | 1.809     | 0.014  | 1.678 |
| AC   | 3.139        | 1.145     | 0.512           | 1.497     | 2.627            | 1.885     | 0.163  | 1.941 |
| BC   | -0.949       | 1.076     | 2.273           | 1.455     | -3.222           | 1.810     | 0.075  | 1.851 |

## consistency analysis

|     | Coef. | Std. Err. | z    | P >  z | [95% Conf. Interval] |
|-----|-------|-----------|------|--------|----------------------|
| A-B | 1.977 | 0.644     | 3.07 | 0.002  | 0.715,3.204          |
| A-C | 2.174 | 0.943     | 2.30 | 0.021  | 0.176,4.023          |

## ring inconsistency detection

| Loop  | IF    | self  | z_value | P_value | CI_95       | Loop_Heterog_tau2 |
|-------|-------|-------|---------|---------|-------------|-------------------|
| A-B-C | 2.378 | 1.745 | 1.363   | 0.173   | (0.00,5.80) | 2.322             |

**Time of procedure spinal**

## Inconsistency analysis

|                                     |
|-------------------------------------|
| Chi2 (3) =7.30 Prob > chi2 = 0.0629 |
|-------------------------------------|

## local inconsistency test (node-splitting method)

| Side | Direct Coef. | Std. Err. | Indierect Coef. | Std. Err. | Difference Coef. | Std. Err. | P>  z | tau   |
|------|--------------|-----------|-----------------|-----------|------------------|-----------|-------|-------|
| AB   | -0.790       | 0.356     | 0.657           | 1.360     | -1.447           | 1.405     | 0.303 | 0.913 |
| AC   | 1.401        | 0.628     | -0.323          | 0.864     | 1.724            | 1.065     | 0.106 | 0.834 |
| BC   | 1.342        | 0.710     | 1.844           | 1.027     | -0.501           | 1.247     | 0.688 | 0.975 |

## consistency analysis

|     | Coef.  | Std. Err. | z     | P>  z | [95% Conf. Interval] |
|-----|--------|-----------|-------|-------|----------------------|
| A-B | -0.697 | 0.348     | -2.01 | 0.045 | -1.378,-0.016        |
| A-C | 0.806  | 0.557     | 1.45  | 0.148 | -0.286,1.899         |

## ring inconsistency detection

| Loop  | IF    | self  | z_value | P_value | CI_95       | Loop_Heterog_tau2 |
|-------|-------|-------|---------|---------|-------------|-------------------|
| A-B-C | 0.890 | 1.119 | 0.796   | 0.426   | (0.00,3.08) | 0.932             |

**subgroup analysis****Obesity/Maternity****First pass**

## Inconsistency analysis

|                                     |
|-------------------------------------|
| Chi2 (3) =0.29 Prob > chi2 = 0.5896 |
|-------------------------------------|

## local inconsistency test (node-splitting method)

| Side | Direct Coef. | Std. Err. | Indierect Coef. | Std. Err. | Difference Coef. | Std. Err. | P>  z | tau   |
|------|--------------|-----------|-----------------|-----------|------------------|-----------|-------|-------|
| AB   | 0.454        | 0.195     | 0.076           | 0.665     | 0.378            | 0.698     | 0.588 | 0.435 |
| AC   | 0.636        | 0.541     | 1.012           | 0.441     | -0.376           | 0.698     | 0.590 | 0.435 |
| BC   | 0.559        | 0.389     | 0.182           | 0.575     | 0.377            | 0.698     | 0.589 | 0.435 |

## consistency analysis

|     | Coef. | Std. Err. | z    | P>  z | [95% Conf. Interval] |
|-----|-------|-----------|------|-------|----------------------|
| A-B | 0.419 | 0.165     | 2.54 | 0.011 | 0.096,0.743          |
| A-C | 0.845 | 0.310     | 2.73 | 0.006 | 0.238,1.452          |

## ring inconsistency detection

| Loop  | IF    | self  | z_value | P_value | CI_95       | Loop_Heterog_tau2 |
|-------|-------|-------|---------|---------|-------------|-------------------|
| A-B-C | 0.257 | 0.732 | 0.351   | 0.726   | (0.00,1.69) | 0.094             |

**First attempt**

## Inconsistency analysis

Chi2 (3) =1.47 Prob > chi2 = 0.2260

## local inconsistency test (node-splitting method)

| Side | Direct Coef. | Std. Err. | Indirect Coef. | Std. Err. | Difference Coef. | Std. Err. | P> z  | tau   |
|------|--------------|-----------|----------------|-----------|------------------|-----------|-------|-------|
| AB   | 0.545        | 0.325     | -0.529         | 0.825     | 1.074            | 0.887     | 0.226 | 0.539 |
| AC   | 0.251        | 0.555     | 1.325          | 0.692     | -1.074           | 0.887     | 0.226 | 0.539 |
| BC   | 0.780        | 0.610     | -0.294         | 0.643     | 1.074            | 0.887     | 0.226 | 0.539 |

## consistency analysis

|     | Coef. | Std. Err. | z    | P> z  | [95% Conf. Interval] |
|-----|-------|-----------|------|-------|----------------------|
| A-B | 0.403 | 0.322     | 1.25 | 0.210 | -0.227,1.033         |
| A-C | 0.678 | 0.462     | 1.47 | 0.142 | -0.227,1.583         |

## ring inconsistency detection

| Loop  | IF    | self  | z_value | P_value | CI_95       | Loop_Heterog_tau2 |
|-------|-------|-------|---------|---------|-------------|-------------------|
| A-B-C | 1.072 | 0.890 | 1.204   | 0.228   | (0.00,2.82) | 0.272             |

**Elderly/Abnormal Spinal Anatomy****First attempt**

## Inconsistency analysis

Chi2 (3) =0.33 Prob > chi2 = 0.5674

## local inconsistency test (node-splitting method)

| Side | Direct Coef. | Std. Err. | Indirect Coef. | Std. Err. | Difference Coef. | Std. Err. | P> z  | tau   |
|------|--------------|-----------|----------------|-----------|------------------|-----------|-------|-------|
| AB   | 0.663        | 0.114     | 0.536          | 0.191     | 0.128            | 0.223     | 0.567 | 0.000 |
| AC   | 0.108        | 0.129     | 0.236          | 0.182     | -0.127           | 0.223     | 0.567 | 0.000 |
| BC   | -0.427       | 0.141     | -0.555         | 0.172     | 0.127            | 0.223     | 0.567 | 0.000 |

## consistency analysis

|     | Coef. | Std. Err. | z    | P> z  | [95% Conf. Interval] |
|-----|-------|-----------|------|-------|----------------------|
| A-B | 0.630 | 0.098     | 6.41 | 0.000 | 0.437,0.822          |
| A-C | 0.151 | 0.105     | 1.43 | 0.151 | -0.055,0.357         |

## ring inconsistency detection

| Loop | IF | self | z_value | P_value | CI_95 | Loop_Heterog_tau2 |
|------|----|------|---------|---------|-------|-------------------|
|------|----|------|---------|---------|-------|-------------------|

|       |       |       |       |       |             |       |
|-------|-------|-------|-------|-------|-------------|-------|
| A-B-C | 0.127 | 0.223 | 0.572 | 0.567 | (0.00,0.56) | 0.000 |
|-------|-------|-------|-------|-------|-------------|-------|

A: Traditional positioning B:Ultrasound assistance C: Real-time guidance

Figure 1S

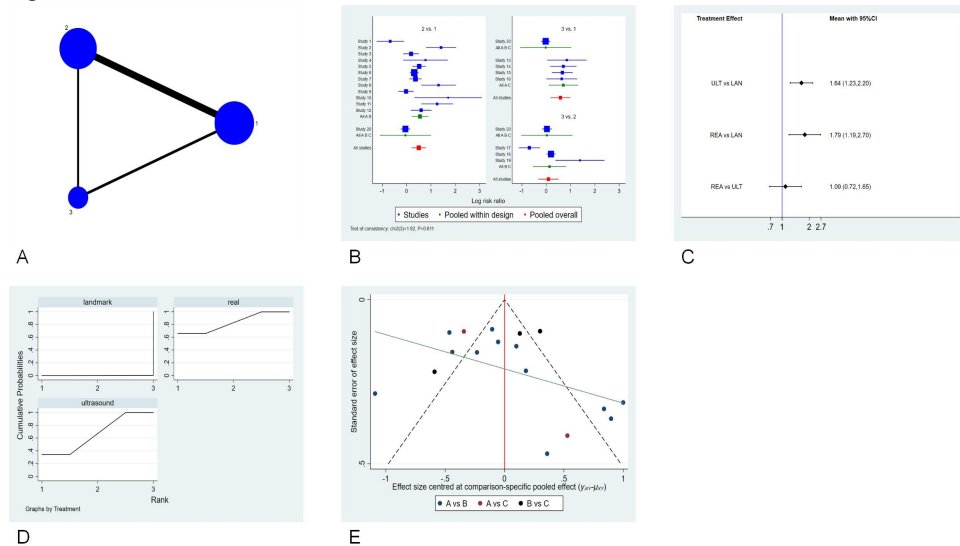

Figure 2S

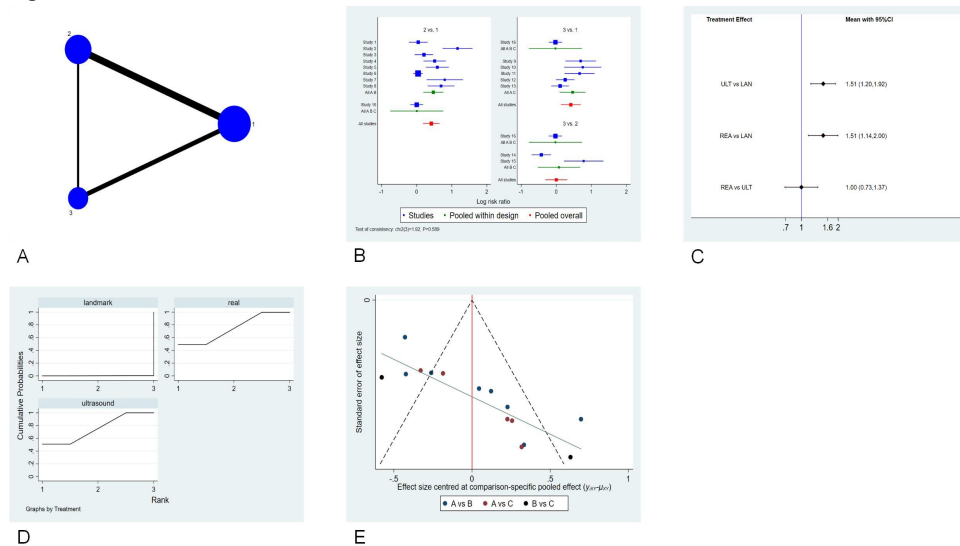

Figure 3S

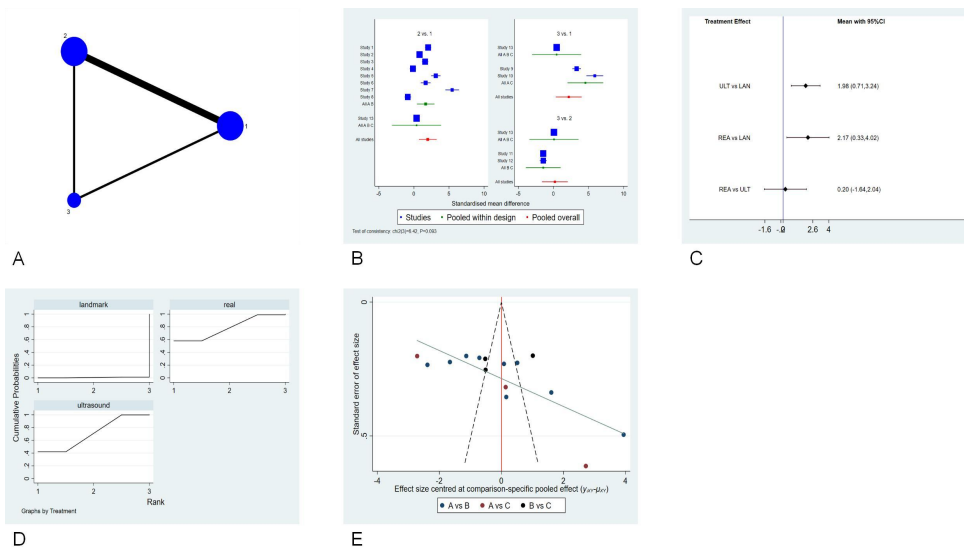

Figure 4S

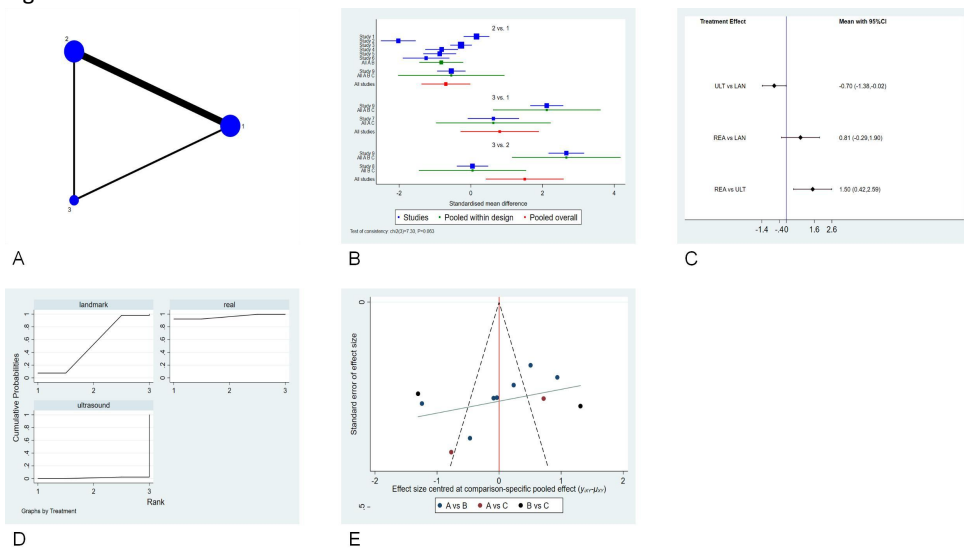

Figure 5S

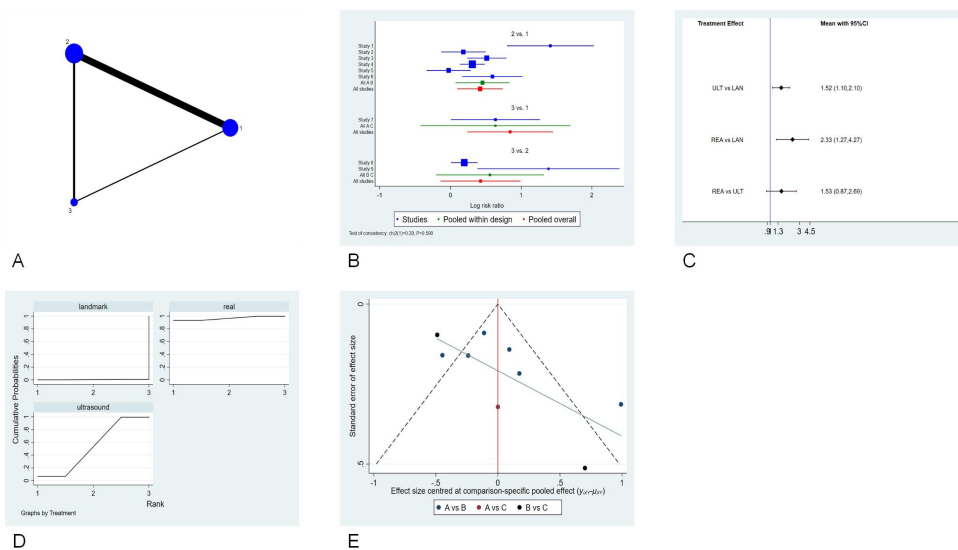

Figure 6S

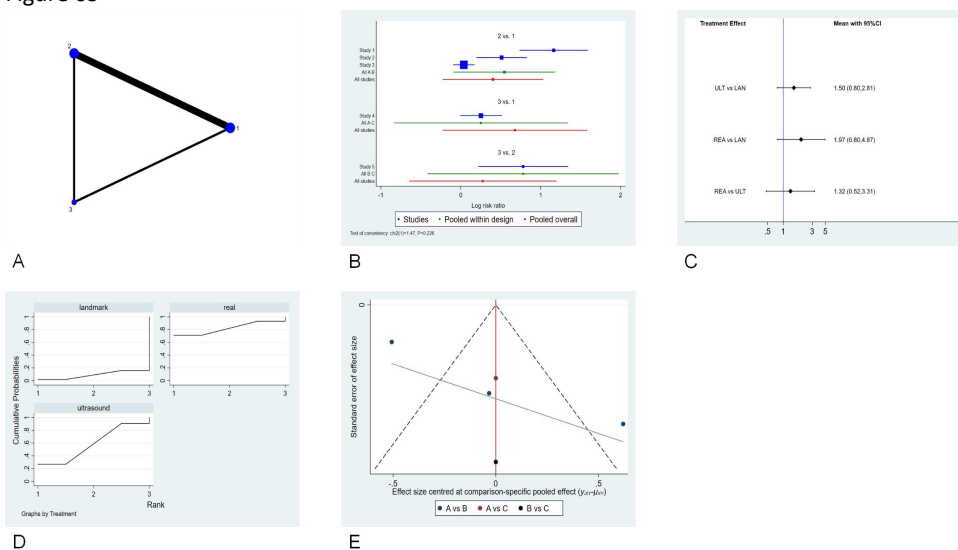

Figure 7S

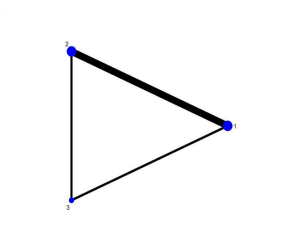

A

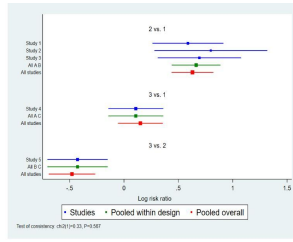

B

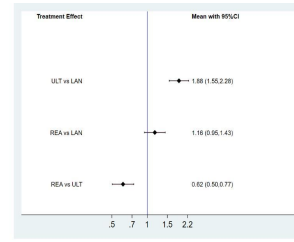

C

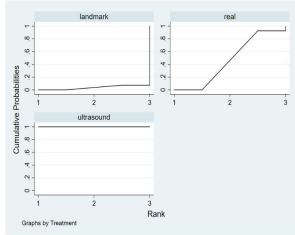

D

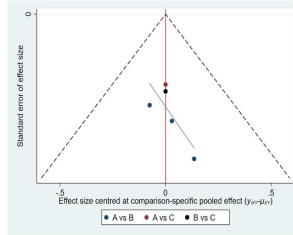

E
